# Supplementary material for: A single-cell transcriptomic atlas of the adult Drosophila ventral nerve cord
Source: eLife. 2020 Apr 21;9:e54074. doi: 10.7554/eLife.54074 (PMC7173974; doi:10.7554/eLife.54074)
Supplement: Figure 1—source data 1. — Table showing the average log-fold change (>0.5) values of cluster-discriminative marker genes, including adjusted p-values (<0.05). pct.1 is the proportion of cells that express the gene in the cluster, pct.2 is the proportion of cells that express the gene in all other clusters. Cell types represented in each cluster are specified where appropriate. To better visualize the data, the intensity of blue in column C reflects average log-fold change values, while the intensity of red in columns D and E reflect the percent cells expressing a given gene inside (pct.1) and outside (pct.2) each cluster. [file elife-54074-fig1-data1.xlsx]

## Sheet: All Cluster Markers
cluster	gene	avg_logFC	pct.1	pct.2	p_val_adj	cluster cell type
0	fkh	1.54403	0.615	0.021	6.02e-131	neuronal
0	HLH4C	1.21253	0.509	0.042	2.02e-40
0	AstA	1.14722	0.152	0.065	0.000734222
0	tey	1.07599	0.422	0.049	1.32e-47
0	CG31221	1.07127	0.899	0.662	5.05e-38
0	VAChT	0.940074	0.759	0.309	2.01e-42
0	oc	0.8558	0.283	0.008	3.5e-209
0	CG42458	0.765942	0.348	0.093	6.82e-15
0	nvy	0.716161	0.363	0.101	2.36e-54
0	CG14762	0.699689	0.573	0.302	7.19e-30
0	ap	0.692549	0.233	0.003	3.62e-221
0	sNPF	0.687156	0.246	0.106	0.0165799
0	Hs3st-A	0.671013	0.758	0.471	3.7e-39
0	MRE23	0.649541	0.218	0.009	5.54e-91
0	Wnt4	0.624449	0.263	0.072	0.0431044
0	CanA-14F	0.599048	0.743	0.522	2.49e-19
0	Rbp9	0.578271	0.692	0.481	2.37e-20
0	CG34354	0.560372	0.515	0.313	5.07e-13
0	ChAT	0.525576	0.395	0.188	2.23e-14
0	kirre	0.503471	0.708	0.495	1.41e-15
1	VGlut	1.78439	0.989	0.331	1.44e-53	neuronal
1	CG42313	0.782445	0.623	0.378	3.29e-35
1	Bx	0.762904	0.681	0.284	1.97e-34
1	CG34355	0.754355	0.373	0.068	4.13e-49
1	Scp2	0.727248	0.701	0.522	0.00904407
1	ey	0.715646	0.279	0.017	8.4e-81
1	CG13287	0.664063	0.223	0.013	9.24e-61
1	tj	0.616716	0.196	0.009	1.06e-59
1	CG12994	0.603082	0.359	0.145	1.25e-20
1	CG17716	0.595135	0.71	0.463	9.26e-24
1	CG10947	0.536405	0.201	0.066	1.28e-19
1	DIP-delta	0.516913	0.545	0.326	1.78e-06
1	CG16833	0.510727	0.424	0.204	6.32e-22
1	CG43373	0.510296	0.192	0.054	2.96e-18
1	beat-IIIb	0.506487	0.596	0.411	3.61e-10
2	mab-21	1.46764	0.712	0.118	1.68e-43	neuronal
2	CG4766	1.30328	0.65	0.104	1.5e-49
2	sv	0.978076	0.344	0.029	3.3e-41
2	salr	0.860234	0.483	0.129	1.36e-19
2	Wnt4	0.827578	0.155	0.074	0.0314989
2	Hs3st-A	0.792397	0.821	0.471	3.95e-49
2	CG14459	0.725747	0.247	0.032	3.11e-53
2	Lim1	0.722286	0.763	0.336	1.01e-21
2	unc-4	0.722261	0.278	0.043	2.72e-37
2	mbl	0.690547	0.97	0.8	1.92e-13
2	Ten-m	0.665423	0.533	0.27	2.21e-36
2	Ubx	0.648988	0.429	0.295	0.00636775
2	CG14509	0.641917	0.724	0.541	3.54e-14
2	pros	0.540658	0.946	0.835	3.09e-12
2	ChAT	0.512061	0.414	0.189	1.7e-11
3	vg	1.35696	0.588	0.046	4.4e-36	neuronal
3	CG8861	1.04902	0.742	0.412	4.35e-37
3	CR45141	1.03085	0.45	0.031	3.74e-87
3	CG4328	0.997876	0.438	0.049	1.47e-40
3	hth	0.730527	0.986	0.842	4.97e-48
3	DIP-beta	0.726522	0.392	0.092	5.19e-24
3	Gad1	0.708638	0.982	0.535	3.35e-11
3	CG14989	0.705943	1	0.817	1.06e-13
3	sens-2	0.669604	0.296	0.03	2.71e-08
3	beat-Ic	0.635042	0.638	0.405	2.74e-18
3	salr	0.606223	0.456	0.13	1.73e-11
3	Lmx1a	0.605893	0.252	0.033	1.55e-16
3	CG18208	0.589431	0.476	0.263	1.2e-15
3	CCAP-R	0.515683	0.194	0.053	1.43e-13
3	Antp	0.514932	0.586	0.555	8.94e-13
4	Abd-B	2.23384	0.683	0.054	2.06e-22	neuronal
4	tra	1.47514	0.575	0.145	1.48e-81
4	abd-A	1.27266	0.62	0.066	1.2e-40
4	Imp	1.13058	0.906	0.312	2.28e-29
4	dsx	1.11995	0.421	0.017	5.95e-78
4	Wnt4	1.11884	0.393	0.07	4.31e-16
4	Cbp53E	1.07243	0.898	0.723	2.26e-40
4	Dh31	1.05267	0.333	0.196	3.55e-05
4	SPR	0.950841	0.442	0.215	2.36e-22
4	iab-8	0.933479	0.294	0.024	1.2e-19
4	bru3	0.879115	0.926	0.693	2.59e-54
4	mamo	0.821904	0.973	0.467	1.15e-09
4	CG31221	0.783758	0.818	0.665	1.41e-23
4	rdgA	0.759891	0.507	0.268	8.52e-21
4	Dop2R	0.740436	0.967	0.773	5.67e-24
4	7B2	0.670615	0.943	0.809	8.75e-63
4	Hsp67Bc	0.66297	0.247	0.109	8.64e-14
4	spab	0.655909	0.294	0.15	3.33e-09
4	Ca-alpha1T	0.620916	0.429	0.217	2.95e-22
4	salr	0.604272	0.305	0.133	1.91e-12
4	Calx	0.602103	0.403	0.181	4.67e-24
4	CG42342	0.593384	0.763	0.473	7.45e-27
4	unc-13-4A	0.592122	0.487	0.232	6.43e-19
4	fru	0.589496	0.446	0.266	2.24e-16
4	CG14762	0.586205	0.53	0.305	1.66e-23
4	jdp	0.58354	0.54	0.359	2.24e-19
4	tna	0.569251	0.894	0.721	2.42e-41
4	jeb	0.56683	0.83	0.606	1.87e-16
4	prim	0.563786	0.466	0.227	5.87e-20
4	CG18208	0.537418	0.466	0.264	1.48e-17
4	dpr18	0.508724	0.505	0.316	3.63e-17
4	Scp2	0.506597	0.603	0.524	4.54e-05
4	Pkc53E	0.501833	0.693	0.563	3.5e-23
4	CG9650	0.500639	0.186	0.052	6.58e-06
5	Sp1	2.49578	0.964	0.041	1.17e-38	neuronal
5	bi	2.09898	0.908	0.083	1.58e-43
5	VGlut	1.85283	0.99	0.333	2.74e-43
5	caup	1.27368	0.671	0.104	2.94e-30
5	svp	0.992985	0.413	0.056	4.4e-34
5	ara	0.978211	0.472	0.079	1.86e-28
5	salr	0.917387	0.56	0.128	1.34e-21
5	Lim3	0.81186	0.367	0.063	3.92e-25
5	mirr	0.794947	0.421	0.126	9.95e-15
5	CG34355	0.726627	0.344	0.069	7.52e-31
5	vvl	0.70982	0.715	0.308	3.03e-14
5	CG30497	0.667898	0.652	0.386	5.21e-21
5	CG42402	0.651636	0.384	0.24	9.46e-16
5	CG32017	0.642438	0.832	0.649	1.31e-21
5	exex	0.639703	0.235	0.014	3.69e-41
5	robo2	0.622034	0.224	0.092	6.78e-15
5	NLaz	0.584678	0.407	0.183	6.68e-08
5	CG1358	0.576649	0.319	0.183	3.55e-34
5	CR32111	0.564819	0.21	0.035	2.65e-33
5	sr	0.543082	0.321	0.158	5.97e-05
5	CG13203	0.540943	0.143	0.009	8.76e-30
5	salm	0.506566	0.226	0.067	4.57e-10
6	VGlut	1.59313	0.994	0.333	3.96e-28	neuronal
6	toy	1.33501	0.686	0.099	5.31e-51
6	E5	1.02086	0.335	0.008	7.55e-86
6	Antp	0.84638	0.722	0.553	3.18e-28
6	CG34355	0.843209	0.38	0.069	7.08e-43
6	kek3	0.824303	0.565	0.263	1.18e-31
6	Ets65A	0.799973	0.401	0.074	3.2e-25
6	CG17716	0.734948	0.762	0.463	2.25e-30
6	CG42313	0.723374	0.684	0.378	3.31e-24
6	ey	0.709586	0.231	0.019	5.38e-42
6	Pvf3	0.616501	0.769	0.564	1.13e-13
6	zld	0.533294	0.584	0.313	3.01e-13
6	ems	0.52217	0.174	0.004	9.82e-101
7	grn	1.1626	0.663	0.157	5.59e-33	neuronal
7	VAChT	1.04146	0.783	0.312	3.61e-44
7	trn	0.84226	0.403	0.17	3.51e-22
7	pros	0.772183	0.991	0.834	7.87e-30
7	vvl	0.698461	0.702	0.308	7.25e-13
7	kek3	0.652772	0.502	0.265	1.14e-19
7	kek1	0.647967	0.835	0.585	3.67e-19
7	Hs3st-A	0.62859	0.768	0.473	2.49e-27
7	Ubx	0.626729	0.476	0.294	1.71e-05
7	HGTX	0.622204	0.219	0.029	1.08e-35
7	Lim1	0.606807	0.715	0.337	5.81e-17
7	CG31221	0.605732	0.856	0.664	2.65e-10
7	luna	0.580747	0.751	0.478	3.72e-15
7	side	0.58038	0.706	0.513	6.06e-17
7	CG12994	0.559387	0.358	0.146	5.95e-12
7	CanA-14F	0.555927	0.7	0.524	4.78e-12
7	ab	0.546862	0.541	0.395	2.09e-10
7	CG43737	0.542149	0.818	0.622	9.25e-21
7	CG7708	0.530927	0.369	0.152	5.32e-16
7	CG14762	0.529334	0.558	0.304	1.06e-14
7	CG12541	0.522689	0.23	0.077	1.42e-14
7	Nos	0.515896	0.185	0.055	0.00579921
8	C15	1.48085	0.533	0.014	1.07e-58	neuronal
8	CG4766	1.38466	0.729	0.103	1.89e-54
8	mab-21	1.26861	0.692	0.12	2.94e-34
8	acj6	1.23269	0.41	0.066	1.9e-11
8	DIP-eta	1.23244	0.306	0.078	7.61e-16
8	Lim3	1.09368	0.515	0.061	9.56e-50
8	PHDP	1.01106	0.37	0.023	1.18e-40
8	CG34367	0.852789	0.324	0.021	3.11e-42
8	CG31221	0.786046	0.868	0.664	5.93e-25
8	fru	0.708835	0.423	0.266	6.45e-12
8	CG32683	0.677954	0.401	0.173	3.83e-18
8	CG14762	0.584428	0.581	0.304	3.68e-21
8	VAChT	0.53742	0.637	0.314	6.29e-10
8	CG42541	0.528791	0.588	0.422	2.02e-09
8	hth	0.515866	0.941	0.843	9.42e-20
9	mab-21	1.29158	0.686	0.12	2.59e-27	neuronal
9	CG4766	1.16568	0.645	0.105	7.19e-33
9	toy	1.0879	0.634	0.101	4.15e-33
9	caup	0.982856	0.52	0.108	1.94e-16
9	CG14989	0.853598	0.998	0.817	6.87e-11
9	CG12594	0.750854	0.384	0.184	3.02e-13
9	salr	0.727314	0.459	0.131	3e-09
9	mirr	0.716505	0.452	0.126	5.15e-10
9	CG42238	0.704207	0.464	0.266	2.37e-45
9	ara	0.695296	0.368	0.081	6.92e-13
9	CG30419	0.649868	0.3	0.092	1.51e-18
9	CG14459	0.599222	0.227	0.033	8.06e-34
9	eIF4A	0.527066	0.85	0.784	4.95e-19
9	CG1814	0.504505	0.543	0.333	2.51e-19
9	Ten-m	0.500037	0.482	0.272	3.98e-12
10	disco	2.26514	0.961	0.01	1.95e-232	neuronal
10	disco-r	2.22028	0.933	0.009	2.18e-268
10	Dh31	1.28182	0.371	0.196	6.6e-19
10	heph	0.986987	0.585	0.338	1.82e-47
10	mamo	0.980717	0.995	0.468	1.91e-31
10	Imp	0.918886	0.952	0.313	6.79e-30
10	CG31221	0.906396	0.864	0.664	3.07e-44
10	jeb	0.836858	0.894	0.605	2.53e-61
10	salr	0.700402	0.392	0.132	3.91e-24
10	spab	0.664259	0.371	0.149	5.24e-13
10	mbl	0.659775	0.972	0.801	4.57e-43
10	rdgA	0.646022	0.465	0.269	1.17e-20
10	VAChT	0.637037	0.721	0.313	4.17e-44
10	CG7708	0.625752	0.484	0.15	3.29e-51
10	CG1607	0.600954	0.417	0.184	7.62e-36
10	Ca-alpha1T	0.572957	0.438	0.218	4.72e-33
10	sm	0.565947	0.977	0.834	5.82e-102
10	CR45312	0.555109	0.412	0.24	6.12e-30
10	unc-13-4A	0.552661	0.438	0.234	3.41e-27
10	CG31345	0.529518	0.505	0.233	1.3e-15
10	CG14762	0.510391	0.604	0.304	7.02e-38
11	CG31345	0.949136	0.715	0.23	1.29e-41	neuronal
11	mamo	0.92333	0.951	0.469	4.69e-26
11	Imp	0.835465	0.868	0.314	5.12e-24
11	sr	0.814753	0.506	0.155	4.2e-29
11	VAChT	0.772138	0.68	0.314	1.58e-64
11	Eip63F-1	0.701547	0.776	0.377	2.94e-34
11	mbl	0.683263	0.948	0.801	5.84e-43
11	CR45223	0.655588	0.268	0.053	1.31e-07
11	CG31221	0.64	0.871	0.664	9.22e-21
11	CG7708	0.636299	0.48	0.15	1.18e-64
11	CG30419	0.572455	0.311	0.092	1.09e-46
11	CG3556	0.562307	0.779	0.445	8.4e-71
11	mt:ND4	0.552456	0.936	0.763	1.08e-83
11	dtn	0.546945	0.532	0.219	5.14e-70
11	pre-rRNA:CR45845	0.518249	0.214	0.099	8.18e-18
11	mt:CoI	0.513081	1	1	2.05e-141
11	Mkp3	0.51104	0.913	0.698	8.39e-105
11	mt:CoII	0.508344	1	0.999	8.47e-140
11	Neb-cGP	0.503635	0.981	0.914	1.54e-100
12	H15	1.61157	0.561	0.037	2.97e-89	neuronal
12	HLH4C	1.5717	0.553	0.045	4.82e-36
12	Hr51	1.24977	0.437	0.016	1.23e-67
12	CG14989	1.14427	1	0.818	1.23e-19
12	CG13408	1.13181	0.292	0.063	2.31e-08
12	DIP-alpha	1.02548	0.304	0.056	1.6e-12
12	mid	1.01259	0.356	0.031	1.5e-76
12	DIP-delta	1.01052	0.629	0.326	7.32e-31
12	Lmpt	0.955916	0.418	0.124	5.35e-18
12	pyr	0.868963	0.287	0.052	9e-21
12	Gad1	0.781771	0.974	0.536	0.000919539
12	sona	0.773499	0.245	0.066	6.34e-18
12	Antp	0.716022	0.933	0.55	1.3e-07
12	Octbeta2R	0.692425	0.485	0.285	3.02e-18
12	beat-VII	0.657653	0.423	0.239	1.07e-06
12	side	0.648563	0.682	0.514	1.75e-08
12	CG34113	0.619807	0.399	0.218	4.91e-15
12	Bx	0.605374	0.525	0.288	1.14e-05
12	Con	0.558408	0.577	0.382	0.00351826
12	5-HT1A	0.542037	0.473	0.322	4.27e-05
12	CG30271	0.534371	0.133	0.021	0.00171067
12	CR44978	0.505968	0.259	0.095	1.99e-10
12	CG32700	0.505006	0.349	0.186	0.0031527
13	VGlut	1.48135	0.998	0.335	4.37e-18	neuronal
13	CG15537	1.39129	0.199	0.056	0.000618424
13	toy	1.32059	0.661	0.101	1.54e-38
13	Ets65A	1.01388	0.477	0.073	3.21e-32
13	grn	0.852944	0.591	0.159	1.83e-09
13	CG34355	0.786409	0.37	0.069	4.23e-31
13	Lim1	0.766956	0.746	0.337	4.82e-13
13	PVRAP	0.757124	0.506	0.216	3.83e-10
13	DIP-theta	0.74268	0.315	0.127	2.2e-06
13	CG31814	0.690068	0.349	0.141	3.35e-08
13	Dr	0.596328	0.228	0.036	1.05e-15
13	hig	0.536821	0.688	0.545	0.000178327
13	zfh2	0.519014	0.249	0.074	4.55e-09
13	CR31451	0.518333	0.99	0.92	9.72e-09
13	Corin	0.516873	0.458	0.284	9.39e-09
13	bnl	0.512137	0.14	0.047	0.0228311
13	CG13739	0.502624	0.637	0.446	0.0371947
14	bi	1.62229	0.811	0.087	3.85e-16	neuronal
14	vvl	0.864731	0.765	0.309	2.07e-10
14	Nlg3	0.842564	0.9	0.641	3.06e-30
14	Ets65A	0.823193	0.368	0.075	6.5e-15
14	Pvf3	0.810401	0.864	0.563	8.37e-13
14	br	0.751171	0.371	0.159	2.41e-07
14	pros	0.732011	0.98	0.835	2.2e-14
14	VAChT	0.709897	0.668	0.315	9.15e-07
14	SoxN	0.699782	0.251	0.074	5.73e-05
14	ChAT	0.685727	0.425	0.19	4.53e-10
14	DIP-gamma	0.659306	0.435	0.248	1.22e-12
14	side	0.655152	0.775	0.512	1.12e-10
14	CG17716	0.560864	0.701	0.465	0.000426308
14	Sema2b	0.549308	0.376	0.206	5.68e-05
14	GluClalpha	0.513884	0.719	0.516	0.0299364
14	jim	0.50525	1	0.981	3.66e-15
15	VGlut	1.84009	1	0.335	1.35e-32	neuronal
15	HLH3B	1.16712	0.416	0.014	5.73e-44
15	mirr	1.14386	0.642	0.124	6.31e-22
15	robo2	1.14281	0.47	0.089	9.16e-37
15	svp	1.01483	0.418	0.057	2.3e-22
15	vvl	0.798764	0.764	0.309	3.2e-13
15	grn	0.797104	0.556	0.16	1.26e-11
15	Bx	0.793661	0.694	0.286	1.24e-23
15	CG34355	0.792445	0.379	0.07	2.47e-35
15	oc	0.650928	0.229	0.012	3.24e-44
15	Sox21a	0.640295	0.21	0.004	9.48e-48
15	PVRAP	0.635065	0.374	0.218	3.19e-07
15	CG1358	0.625579	0.382	0.182	8.51e-15
15	twz	0.619554	0.231	0.06	0.00105874
15	Lim1	0.600373	0.696	0.339	2.02e-11
15	CG33543	0.59823	0.514	0.277	2.93e-07
15	Gyc88E	0.51002	0.231	0.059	9.81e-10
16	Ets21C	1.7126	0.589	0.003	0	neuronal
16	mirr	1.32013	0.771	0.122	3.91e-33
16	SoxN	1.11304	0.461	0.071	7.01e-22
16	vvl	0.976982	0.815	0.308	2.98e-29
16	dpr13	0.904768	0.904	0.518	3.87e-34
16	Ptx1	0.834541	0.349	0.035	7.68e-34
16	PVRAP	0.790117	0.573	0.215	9.19e-17
16	CG30419	0.653893	0.307	0.092	4.62e-19
16	CG3655	0.628267	0.419	0.161	4.24e-12
16	VAChT	0.589744	0.643	0.315	3.99e-10
16	Dr	0.586669	0.258	0.036	4.51e-20
16	br	0.563571	0.32	0.159	0.00188921
16	CR44978	0.55643	0.273	0.095	1.08e-13
16	ChAT	0.544756	0.445	0.19	3.89e-12
16	glob1	0.52451	0.18	0.057	1.98e-11
16	Hs3st-A	0.522652	0.763	0.474	4.3e-17
16	CG33639	0.513531	0.435	0.219	4.94e-11
17	beat-Ia	1.90096	0.781	0.274	5.09e-110	neuronal
17	vg	1.72616	0.786	0.045	5.3e-41
17	Eip63F-1	1.29095	0.726	0.379	1.36e-59
17	D	1.28361	0.501	0.011	5.86e-43
17	CR45141	1.1552	0.525	0.032	3.09e-79
17	CG42674	1.10381	0.876	0.337	2.7e-52
17	tey	1.0932	0.449	0.052	1.51e-31
17	Gad1	1.08675	0.984	0.537	1.38e-23
17	CG14989	1.01953	0.997	0.818	6.39e-23
17	svp	0.920213	0.433	0.057	5.75e-26
17	dpr10	0.894659	0.588	0.214	2.84e-55
17	Gyc88E	0.853021	0.272	0.059	1.16e-25
17	beat-Ic	0.835339	0.76	0.405	1.02e-25
17	CG17839	0.822703	0.575	0.256	4.75e-24
17	Sox21b	0.806062	0.293	0.006	5.29e-132
17	DIP-zeta	0.75629	0.208	0.036	3.54e-18
17	CG32225	0.721001	0.631	0.287	4.11e-34
17	Tina-1	0.666007	0.755	0.457	5.01e-42
17	CG16833	0.657051	0.493	0.205	1.34e-36
17	ths	0.656422	0.435	0.171	1.05e-37
17	CG42458	0.655558	0.332	0.096	4.84e-05
17	cpx	0.643047	1	0.966	1.95e-42
17	CG9328	0.637848	0.916	0.73	2.65e-49
17	VGAT	0.625973	0.596	0.271	4.2e-29
17	pyr	0.604055	0.195	0.053	5.84e-26
17	dpr1	0.599391	0.773	0.457	7.19e-16
17	Cngl	0.580953	0.974	0.883	2.67e-30
17	beat-IV	0.559625	0.301	0.147	1.3e-14
17	CG8861	0.558679	0.681	0.415	4.46e-10
17	CG42238	0.55575	0.491	0.266	3.62e-24
17	CG15236	0.547168	0.317	0.123	2.92e-17
17	Teh2	0.544034	0.71	0.455	4.98e-26
17	CG9813	0.520491	0.673	0.495	6.1e-28
17	CG7582	0.51612	0.623	0.392	8.79e-31
17	SoxN	0.507246	0.301	0.073	4.75e-06
17	shep	0.504924	0.997	0.972	5.37e-29
18	CG13056	1.2435	0.27	0.28	2.37e-19	undefined
19	scro	1.98307	0.784	0.01	2.78e-94	neuronal
19	Fer2	1.49015	0.588	0.029	1.39e-32
19	Mmp2	1.3737	0.628	0.219	8.8e-70
19	Gad1	1.24661	0.986	0.537	4.44e-26
19	Scp2	1.20387	0.732	0.523	7.99e-25
19	mirr	1.06059	0.625	0.125	1.83e-17
19	CG14989	0.972733	1	0.818	1.13e-14
19	vvl	0.931937	0.827	0.308	3.35e-20
19	CG43902	0.913476	0.527	0.187	2.64e-14
19	NK7.1	0.865947	0.403	0.141	3.61e-40
19	CR44754	0.840274	0.121	0.002	0.00222825
19	CG42674	0.789559	0.677	0.34	1.75e-18
19	fz2	0.774423	0.68	0.402	2.17e-34
19	CG12594	0.76262	0.481	0.183	8.08e-10
19	SPR	0.733709	0.38	0.217	1.36e-06
19	fz	0.714477	0.398	0.211	2.47e-15
19	GluRIA	0.664365	0.55	0.293	1.46e-18
19	Dscam2	0.66346	0.83	0.73	3.69e-29
19	igl	0.662916	0.827	0.676	2.26e-08
19	CG42458	0.639891	0.331	0.096	0.00848594
19	mspo	0.623143	0.735	0.464	7.2e-14
19	CG42817	0.596686	0.282	0.133	8.01e-10
19	CG1607	0.590925	0.504	0.288	4.33e-23
19	dpr6	0.583666	0.628	0.406	1.86e-11
19	Ac78C	0.582876	0.207	0.042	3.75e-08
19	nAChRalpha1	0.567155	0.527	0.385	7.82e-10
19	msi	0.559875	0.824	0.75	4.73e-11
19	CG31324	0.553138	0.611	0.411	1.84e-12
19	dati	0.552925	0.749	0.555	1.88e-13
19	Gyc88E	0.548405	0.256	0.059	2.71e-09
19	Trim9	0.542627	0.343	0.15	8.21e-11
19	CG32698	0.533712	0.256	0.138	4.95e-07
19	CR46006	0.528545	0.228	0.09	2.81e-13
19	CG16833	0.522932	0.406	0.206	3.56e-14
20	CG32354	1.46979	0.468	0.021	1.29e-60	neuronal
20	lbl	1.37722	0.529	0.007	2.18e-278
20	vg	1.35338	0.599	0.049	9.58e-20
20	toy	1.15963	0.669	0.102	6.77e-27
20	CR45141	1.04674	0.445	0.034	1.34e-42
20	CG14989	0.85592	1	0.818	1.95e-09
20	DIP-beta	0.781818	0.387	0.094	1.34e-15
20	salr	0.776632	0.407	0.132	4.46e-07
20	pros	0.713727	0.956	0.835	1.38e-15
20	br	0.703224	0.349	0.159	1.38e-09
20	Gad1	0.694562	0.968	0.537	4.19e-05
20	CR31451	0.611024	0.997	0.92	1.98e-29
20	jim	0.610694	1	0.982	1.2e-45
20	mbl	0.55008	0.907	0.802	1.28e-05
20	CG42541	0.549162	0.578	0.423	0.000226645
20	CG32017	0.528651	0.875	0.649	4.47e-11
20	salm	0.519197	0.212	0.068	2.82e-07
21	grn	1.28391	0.698	0.159	3.78e-27	neuronal
21	twz	1.0244	0.282	0.06	2.24e-18
21	br	0.895353	0.452	0.158	2.28e-11
21	tey	0.80297	0.293	0.055	5.15e-10
21	VAChT	0.785273	0.71	0.315	8.37e-13
21	CG8861	0.743161	0.625	0.416	3.85e-08
21	unc-4	0.737428	0.311	0.044	2.48e-24
21	Lim1	0.717483	0.727	0.339	4.15e-12
21	ChAT	0.714824	0.443	0.19	2.72e-16
21	salr	0.692366	0.326	0.134	9e-06
21	igl	0.68843	0.865	0.675	6.28e-14
21	Bx	0.676647	0.663	0.287	5.15e-09
21	dati	0.627529	0.716	0.556	1.81e-19
21	Ace	0.621939	0.78	0.53	3.86e-13
21	hdc	0.61883	0.804	0.662	8.71e-13
21	Hs3st-A	0.590188	0.762	0.474	1.49e-12
21	orb2	0.579182	0.856	0.678	6.86e-09
21	Lmpt	0.53722	0.287	0.127	0.0329905
21	Cadps	0.519275	0.806	0.651	1e-06
21	CG42260	0.517703	0.795	0.651	1.28e-14
21	CG30158	0.504057	0.22	0.098	2.16e-09
21	dpr13	0.501867	0.713	0.521	0.0102113
22	fkh	1.494	0.645	0.027	2.18e-36	neuronal
22	mab-21	1.2834	0.694	0.123	5.54e-24
22	CG45781	1.1947	0.437	0.084	2.79e-17
22	CG44422	1.11912	0.728	0.348	5.41e-44
22	HLH3B	1.08402	0.422	0.015	4.04e-34
22	CG4766	1.00845	0.575	0.108	3.55e-19
22	comm	0.735322	0.407	0.111	1.2e-39
22	CG14989	0.710629	1	0.818	6.46e-06
22	inv	0.707658	0.272	0.01	2e-48
22	Ac78C	0.682177	0.248	0.042	3.42e-14
22	Nos	0.677705	0.232	0.055	5.7e-07
22	MYPT-75D	0.658299	0.639	0.32	3.9e-22
22	Gad1	0.625526	0.976	0.538	0.00610153
22	nvy	0.62487	0.352	0.104	1.18e-22
22	Ubx	0.618029	0.55	0.294	0.00105138
22	tok	0.613844	0.297	0.09	5.34e-21
22	Sytalpha	0.609164	0.407	0.166	1.91e-14
22	VGAT	0.60311	0.557	0.272	3.44e-16
22	CG13739	0.602535	0.771	0.445	5.9e-15
22	en	0.600706	0.242	0.009	1.4e-34
22	CG44153	0.594383	0.309	0.112	1.15e-17
22	Lim1	0.588684	0.728	0.339	2.85e-11
22	grn	0.583878	0.529	0.161	9.86e-05
22	trv	0.572924	0.933	0.712	1.89e-16
22	MRE23	0.572135	0.22	0.012	5.82e-22
22	CG31475	0.563281	0.321	0.166	2.33e-08
22	CG31997	0.561822	0.465	0.272	0.000966648
22	Npc2a	0.561571	0.33	0.132	3.32e-10
22	dati	0.554301	0.856	0.554	7.11e-24
22	orb2	0.547281	0.878	0.678	1.01e-15
22	igl	0.546685	0.832	0.676	2.62e-11
22	hdc	0.53883	0.872	0.661	3.1e-17
22	CG8861	0.51808	0.645	0.416	0.00197924
22	NaCP60E	0.500288	0.93	0.801	3.42e-25
23	CG9686	2.6289	0.323	0.078	6.57e-101	neuronal/glial mixed
23	CG8369	2.49385	0.749	0.143	3.11e-89
23	Adh	2.22402	0.956	0.266	2.05e-73
23	Tsf1	2.21028	0.683	0.105	6.89e-54
23	Ugt35b	2.0524	0.796	0.07	2.8e-32
23	euc	2.01323	0.492	0.06	4.9e-40
23	CG15201	1.98316	0.514	0.061	7.01e-48
23	nrv2	1.96528	0.912	0.209	2.04e-80
23	Obp44a	1.93783	0.37	0.058	2.21e-75
23	CG16743	1.91804	0.646	0.057	1.32e-20
23	CG10433	1.81203	0.693	0.093	8.94e-18
23	CG30197	1.76062	0.614	0.094	2.59e-26
23	CG3940	1.72031	0.683	0.077	9.83e-31
23	CG7607	1.65327	0.439	0.084	5.02e-24
23	CG32521	1.56803	0.655	0.185	4.68e-66
23	Sod3	1.55742	0.614	0.065	6.44e-24
23	CG5895	1.47229	0.517	0.04	8.24e-37
23	MRE16	1.47159	1	0.983	5.91e-87
23	CG31248	1.45393	0.53	0.069	4.59e-42
23	CG14141	1.44876	0.549	0.069	4.76e-17
23	CG9657	1.44765	0.517	0.039	1.02e-20
23	vir-1	1.42103	0.633	0.098	4.35e-16
23	CG1552	1.41438	0.665	0.13	2.19e-15
23	Msr-110	1.39969	0.555	0.055	3.35e-19
23	CG31676	1.35167	0.495	0.063	4.37e-21
23	CG7888	1.30149	0.486	0.046	1.01e-17
23	CG10513	1.29998	0.423	0.038	2.36e-20
23	Gs2	1.2841	0.705	0.14	1.49e-15
23	GstE2	1.26268	0.458	0.052	3.18e-21
23	mnd	1.25092	0.27	0.049	8.09e-46
23	SPARC	1.24876	0.354	0.045	0.00236662
23	CG15209	1.22514	0.351	0.079	1.07e-07
23	GstD1	1.22063	0.458	0.087	2.42e-17
23	CG31706	1.20505	0.279	0.02	3.1e-30
23	bbc	1.20473	0.68	0.29	4.53e-39
23	bnb	1.19368	0.292	0.022	1.03e-40
23	MtnA	1.18992	0.216	0.03	2.07e-14
23	Irk2	1.186	0.401	0.041	4.52e-32
23	Npc2a	1.18349	0.483	0.13	2.47e-32
23	Dbi	1.17912	0.323	0.026	1.09e-30
23	CG1545	1.14414	0.451	0.054	1.12e-14
23	GstD9	1.13409	0.26	0.023	1.43e-16
23	CG6218	1.12108	0.389	0.124	5.31e-55
23	Prip	1.09505	0.219	0.027	3.04e-07
23	Idgf3	1.09466	0.389	0.034	7.06e-19
23	CG14687	1.0799	0.451	0.07	0.00259757
23	Spn43Ab	1.06403	0.304	0.024	8.39e-13
23	CG9377	1.05978	0.26	0.023	7.36e-09
23	GstE12	1.05658	0.401	0.064	1.88e-15
23	apolpp	1.04522	0.188	0.026	9.59e-28
23	CG6357	1.0384	0.37	0.041	1.64e-17
23	hoe1	1.01485	0.379	0.047	5.92e-34
23	zyd	0.995958	0.285	0.02	1.72e-26
23	CG6287	0.989068	0.298	0.027	2.28e-18
23	CG11892	0.977814	0.132	0.037	1.53e-17
23	CAH1	0.969607	0.364	0.056	3.28e-08
23	Idgf6	0.962465	0.176	0.013	7.3e-21
23	Inx3	0.949449	0.313	0.022	6.01e-19
23	CDase	0.943956	0.276	0.012	6.54e-63
23	Cyp4g15	0.935808	0.21	0.025	3.91e-20
23	Obp8a	0.933369	0.226	0.013	4.03e-34
23	Orcokinin	0.921956	0.317	0.292	1.98e-12
23	wrapper	0.919647	0.122	0.006	5.99e-34
23	CG10863	0.916338	0.367	0.125	1.87e-38
23	mfas	0.91507	0.295	0.03	3.63e-19
23	tal-AA	0.914623	0.288	0.031	3.93e-08
23	Pcyt2	0.904378	0.31	0.035	0.00141426
23	CR43259	0.900239	0.248	0.016	1.52e-34
23	CG6356	0.899465	0.191	0.01	1.05e-24
23	CG42235	0.893111	0.176	0.012	1.47e-16
23	CG31663	0.885203	0.31	0.02	3.39e-26
23	CG9507	0.876536	0.232	0.012	3.7e-15
23	Treh	0.876413	0.423	0.138	1.42e-19
23	CG4829	0.868088	0.285	0.03	1.78e-22
23	List	0.863117	0.226	0.014	3.99e-10
23	CG6723	0.857306	0.276	0.025	1.24e-18
23	CG10514	0.854701	0.248	0.038	5.21e-25
23	Cyp9f2	0.853441	0.292	0.037	6.26e-10
23	eEF1alpha1	0.852699	0.715	0.483	3.89e-15
23	CG12730	0.852593	0.326	0.063	5.5e-30
23	dally	0.842661	0.646	0.415	3.8e-25
23	CG15098	0.835088	0.398	0.155	3.11e-15
23	wtrw	0.830961	0.235	0.018	3.28e-32
23	CG12177	0.828078	0.348	0.095	7.78e-32
23	CG5758	0.825607	0.677	0.392	6.51e-22
23	gem	0.82297	0.376	0.08	0.000443739
23	Csas	0.820953	0.282	0.032	3.24e-21
23	Alp4	0.807276	0.172	0.007	3.05e-48
23	CG5254	0.805126	0.238	0.015	8.1e-34
23	CG14688	0.801864	0.26	0.035	1.65e-13
23	CG30285	0.794121	0.235	0.03	1.43e-05
23	RpL22	0.793462	0.73	0.5	1.7e-15
23	Tsp5D	0.775651	0.395	0.059	0.00239271
23	Timp	0.773633	0.232	0.024	0.0509717
23	Gabat	0.773601	0.893	0.717	4.51e-19
23	CG31705	0.766599	0.273	0.05	8.19e-05
23	Picot	0.763806	0.163	0.017	6.54e-20
23	CG17896	0.753089	0.367	0.128	1.2e-28
23	Ssk	0.751457	0.219	0.022	1.7e-21
23	ogre	0.750834	0.304	0.046	0.000237063
23	CG32032	0.744832	0.201	0.019	4.4e-08
23	Inx2	0.740091	0.276	0.032	8.41e-11
23	Cyp28d1	0.7271	0.216	0.025	1.1e-08
23	ced-6	0.725702	0.226	0.019	2.92e-28
23	CG2852	0.723886	0.636	0.581	9.25e-11
23	CG9471	0.715746	0.304	0.118	1.64e-25
23	GstE1	0.711011	0.216	0.029	1.78e-09
23	Cyp28a5	0.709072	0.21	0.02	5.94e-13
23	Sodh-2	0.692076	0.185	0.024	4.01e-25
23	CG40470	0.675304	0.103	0.005	2.68e-36
23	myo	0.670029	0.226	0.045	1.34e-23
23	CG3270	0.66478	0.113	0.008	8.81e-15
23	Past1	0.656811	0.282	0.096	2.58e-21
23	CG5273	0.652882	0.414	0.23	5.83e-12
23	N	0.65021	0.169	0.016	9.49e-09
23	CG44325	0.643529	0.176	0.032	1.21e-05
23	Oatp58Dc	0.642266	0.185	0.01	9.23e-34
23	Pdk	0.639879	0.298	0.119	1.23e-15
23	CG14945	0.639488	0.194	0.014	5.41e-20
23	Taldo	0.63898	0.213	0.049	3.95e-21
23	Got1	0.632382	0.301	0.12	5.63e-13
23	CG13124	0.622686	0.201	0.042	6.53e-15
23	CR45161	0.619672	0.157	0.015	2.06e-06
23	CR44107	0.615979	0.182	0.011	9.88e-22
23	CG17841	0.614485	0.395	0.209	6.49e-07
23	CG12926	0.612446	0.169	0.017	1.63e-21
23	EbpIII	0.605351	0.138	0.01	2.83e-12
23	Mdh1	0.604694	0.533	0.326	6.96e-10
23	RpL41	0.600209	0.972	0.9	1.46e-15
23	CG31869	0.600179	0.154	0.009	6.17e-13
23	Orct	0.594665	0.185	0.015	6.21e-06
23	CG4409	0.58886	0.122	0.011	2.38e-09
23	DNaseII	0.588008	0.179	0.017	0.000142636
23	aay	0.584146	0.223	0.045	2.19e-05
23	bdl	0.575772	0.204	0.027	4.91e-12
23	CG10311	0.574656	0.154	0.014	5.33e-08
23	Mal-A5	0.574269	0.166	0.01	4.12e-22
23	Invadolysin	0.574105	0.266	0.127	1.89e-14
23	nuf	0.564199	0.298	0.137	9.56e-11
23	mgl	0.561816	0.395	0.241	1.82e-10
23	CG11889	0.552479	0.144	0.011	7.33e-15
23	CG6040	0.550595	0.132	0.009	1.34e-07
23	CG31344	0.543933	0.27	0.12	1.74e-09
23	wdp	0.539162	0.163	0.011	2.06e-09
23	santa-maria	0.537001	0.138	0.008	1.71e-18
23	CG11791	0.535852	0.188	0.055	3.16e-07
23	CG31974	0.533237	0.132	0.023	1.64e-05
23	ine	0.529546	0.169	0.017	1.07e-14
23	CG9436	0.524449	0.15	0.016	1.94e-10
23	Proc-R	0.515642	0.147	0.008	7.57e-30
23	CG7084	0.515524	0.135	0.014	4.13e-06
23	CG4302	0.513798	0.129	0.015	0.00549294
23	CR43334	0.507129	0.169	0.092	3.9e-05
23	CG42613	0.507069	0.718	0.651	4.44e-12
23	CG1213	0.506896	0.16	0.013	5.48e-06
23	Gel	0.501341	0.163	0.031	4.42e-16
24	alrm	4.97518	0.978	0.123	0	glial
24	Gat	4.92635	0.997	0.14	0
24	CG9394	4.55893	0.953	0.096	0
24	CG1552	3.90024	0.953	0.127	4.65e-184
24	Gs2	3.69778	0.987	0.136	3.06e-188
24	Eaat1	3.5686	0.969	0.03	0
24	CG15209	3.56396	0.858	0.073	4.01e-116
24	Tsp5D	3.41405	0.881	0.053	0
24	CG13631	3.2355	0.849	0.039	3.08e-260
24	CG7607	3.18135	0.953	0.078	7.23e-185
24	CG14141	3.03556	0.906	0.065	1.03e-130
24	bbc	3.00395	0.965	0.286	0
24	CAH1	2.98432	0.789	0.051	5.68e-104
24	CG1537	2.87493	0.881	0.017	0
24	ogre	2.86401	0.921	0.039	2.34e-226
24	Msr-110	2.85793	0.862	0.051	1.29e-115
24	CG43693	2.81053	0.836	0.027	0
24	CG1545	2.69799	0.855	0.049	3.58e-126
24	vir-1	2.69384	0.912	0.094	7.3e-58
24	CG31705	2.69054	0.796	0.043	5.19e-126
24	tal-AA	2.6625	0.808	0.025	5.11e-173
24	Chd64	2.59456	0.877	0.18	0
24	CG7888	2.56938	0.846	0.042	8.58e-75
24	Treh	2.54006	0.833	0.133	1.55e-298
24	Adgf-D	2.49654	0.777	0.015	0
24	GstD3	2.40709	0.642	0.019	2.61e-196
24	Adh	2.37818	0.953	0.266	8.22e-65
24	GstE2	2.3545	0.786	0.049	8.65e-80
24	MRE16	2.33969	1	0.983	1.02e-214
24	nrv2	2.33643	0.915	0.209	1.6e-87
24	Rh50	2.29167	0.764	0.027	2.9e-19
24	CG3940	2.24696	0.651	0.077	2.22e-41
24	wun2	2.21373	0.717	0.007	0
24	RpL22	2.20583	0.925	0.497	4.45e-235
24	Sod3	2.1804	0.752	0.063	3.17e-41
24	Inx2	2.17972	0.73	0.027	3.49e-173
24	CG14688	2.13066	0.676	0.03	5.59e-162
24	aay	2.11284	0.635	0.04	3.22e-117
24	GstE12	2.08336	0.758	0.06	8.11e-59
24	CR45018	2.06095	0.462	0.013	1.09e-173
24	e	2.0355	0.553	0.005	0
24	GstE1	2.00473	0.579	0.025	1.87e-166
24	CG6465	1.98428	0.601	0.01	0
24	Amph	1.97349	0.871	0.246	4.26e-283
24	Cyp4g15	1.93953	0.61	0.02	1.18e-166
24	CG5273	1.88536	0.748	0.226	8.08e-197
24	Cyp9f2	1.84087	0.619	0.033	3.94e-50
24	CG32982	1.83207	0.893	0.285	6.67e-80
24	mfas	1.81659	0.597	0.027	1.09e-111
24	CG42342	1.76333	0.918	0.473	1.41e-75
24	GstD1	1.76253	0.579	0.086	3.15e-28
24	Dat	1.71404	0.667	0.177	2.45e-68
24	Pdk	1.70515	0.619	0.115	5.16e-166
24	temp	1.69463	0.638	0.144	3.39e-142
24	ninaB	1.68267	0.465	0.011	6.85e-237
24	bdl	1.67517	0.553	0.023	1.2e-153
24	Galphai	1.66471	0.503	0.009	0
24	CG8369	1.64082	0.626	0.145	1.18e-22
24	CG15203	1.62268	0.491	0.008	3.69e-58
24	Irk2	1.59931	0.55	0.039	9.61e-51
24	CR43334	1.59349	0.525	0.088	2.09e-50
24	fok	1.57976	0.786	0.301	9.39e-127
24	CR45161	1.57524	0.478	0.012	2.57e-36
24	htl	1.55969	0.472	0.005	0
24	CG1358	1.54554	0.651	0.18	6.79e-44
24	Csas	1.53105	0.497	0.03	5.4e-72
24	CG31235	1.52782	0.484	0.005	0
24	mnd	1.52684	0.497	0.046	1.43e-62
24	Hexo2	1.50389	0.393	0.009	9.19e-234
24	Pif1A	1.47187	0.61	0.17	6.89e-82
24	CG6723	1.46985	0.469	0.023	2.14e-54
24	CG34367	1.44202	0.39	0.022	2.08e-47
24	repo	1.44139	0.403	0.013	1.67e-91
24	CG42741	1.4374	0.409	0.005	2.11e-203
24	CG4829	1.43513	0.481	0.028	9.2e-58
24	CG14687	1.41643	0.44	0.07	0.000254637
24	GILT3	1.41613	0.437	0.012	7.54e-140
24	Gapdh1	1.41598	0.836	0.559	1.43e-41
24	CG31676	1.40468	0.481	0.063	2.01e-14
24	pdgy	1.4042	0.409	0.022	1.17e-16
24	CR43459	1.39279	0.503	0.099	1.28e-123
24	Tet	1.38085	0.881	0.526	1.13e-97
24	CG6770	1.37158	0.984	0.874	5.56e-95
24	CG17739	1.35742	0.381	0.011	2.73e-48
24	CG31974	1.32384	0.362	0.02	8.53e-41
24	Cyp28a5	1.31223	0.371	0.018	1.45e-48
24	CG13707	1.30765	0.406	0.017	1.83e-107
24	dally	1.2827	0.858	0.413	6.87e-39
24	Got1	1.28095	0.491	0.118	1.49e-54
24	GILT2	1.24974	0.327	0.009	3.17e-167
24	Pino	1.23139	0.412	0.103	4.49e-77
24	CG10365	1.22766	0.349	0.028	1.07e-131
24	Mdh1	1.21763	0.629	0.325	3.12e-35
24	CG12730	1.20254	0.393	0.062	6.37e-45
24	ine	1.18411	0.343	0.015	3.96e-66
24	CG15098	1.18338	0.579	0.153	1.24e-26
24	Eno	1.18012	0.915	0.668	8.39e-21
24	Mob2	1.17659	0.758	0.453	5.56e-35
24	CG32521	1.16461	0.538	0.186	1.6e-19
24	wun	1.13622	0.5	0.153	1.41e-81
24	Rac2	1.13447	0.311	0.013	3.2e-44
24	CG30015	1.12402	0.336	0.052	3.08e-71
24	CG13124	1.1181	0.333	0.041	7.68e-37
24	Cyp28d1	1.1069	0.321	0.024	2.3e-16
24	CG10433	1.09863	0.443	0.096	0.0458156
24	retm	1.07321	0.575	0.271	1.31e-40
24	Lsd-2	1.06557	0.308	0.016	2.09e-16
24	CG32032	1.04448	0.27	0.018	1.73e-14
24	Prosap	1.04135	0.906	0.724	2.76e-74
24	CG17896	1.03707	0.431	0.127	9.82e-45
24	CG17841	1.03152	0.484	0.208	2.65e-14
24	CG10863	1.03109	0.409	0.124	8.57e-29
24	flw	1.02166	0.912	0.783	4.61e-39
24	CG31706	1.01509	0.239	0.021	2.83e-14
24	CG5758	1.01504	0.704	0.392	1.85e-17
24	fng	1.00938	0.267	0.01	2.85e-42
24	wgn	1.0068	0.27	0.004	3.03e-190
24	CG15611	1.00481	0.252	0.004	1.01e-171
24	CG5895	1.00266	0.324	0.042	6.47e-10
24	CG9471	0.992492	0.406	0.116	2.93e-36
24	spir	0.970626	0.582	0.29	3.42e-28
24	RpL41	0.969896	0.978	0.9	3.88e-29
24	Syb	0.946632	0.264	0.018	4.71e-28
24	Spn31A	0.939661	0.226	0.002	1.65e-148
24	CG6357	0.928129	0.283	0.042	2.61e-08
24	zfh2	0.920386	0.321	0.074	9.53e-16
24	cv-c	0.91292	0.201	0.007	2.65e-48
24	Pgk	0.911596	0.682	0.419	2.9e-05
24	CG12991	0.909787	0.664	0.396	1.51e-42
24	fog	0.900847	0.236	0.006	9.29e-66
24	CG4409	0.88672	0.198	0.01	9.61e-28
24	Tpi	0.886116	0.755	0.524	0.00156645
24	l(1)G0193	0.883399	0.336	0.092	3.61e-33
24	Pglym78	0.875982	0.789	0.539	0.00506705
24	ced-6	0.875547	0.245	0.019	2.41e-30
24	pnt	0.87071	0.226	0.006	1.12e-92
24	CG17508	0.8705	0.619	0.408	1.95e-27
24	RapGAP1	0.864766	0.714	0.408	4.37e-11
24	CG5955	0.853204	0.176	0.006	1.08e-68
24	rho	0.849125	0.289	0.1	1.04e-05
24	Adgf-C	0.843281	0.201	0.001	7.01e-106
24	RpL13	0.840536	0.824	0.635	0.00429523
24	N	0.839428	0.233	0.015	4.1e-10
24	CR17025	0.838755	0.176	0.003	4.31e-109
24	CG12177	0.838128	0.292	0.095	3.39e-17
24	RhoGAP18B	0.837378	0.214	0.004	3.66e-113
24	Idgf3	0.829141	0.255	0.035	1.26e-06
24	nkd	0.809797	0.431	0.213	8.46e-18
24	CG7029	0.804957	0.45	0.227	1.53e-13
24	CG12355	0.803354	0.657	0.466	2.49e-11
24	hoe1	0.800692	0.261	0.048	1.57e-11
24	eEF1alpha1	0.795516	0.723	0.483	0.00243172
24	E23	0.794044	0.192	0.004	3.7e-89
24	Ace	0.793667	0.792	0.531	1.73e-10
24	CG5888	0.791919	0.214	0.008	2.26e-81
24	Got2	0.790032	0.384	0.167	2.36e-14
24	CG42265	0.78972	0.434	0.182	5.25e-23
24	mlt	0.788258	0.55	0.367	8.25e-18
24	Synd	0.787316	0.314	0.12	5.92e-21
24	CG6834	0.785358	0.192	0.005	1.03e-84
24	CG14945	0.783887	0.189	0.014	1.33e-17
24	CG10126	0.770713	0.192	0.012	1.45e-37
24	CG12065	0.769186	0.214	0.033	5.78e-19
24	Picot	0.76511	0.204	0.016	3.49e-17
24	myo	0.752192	0.233	0.045	3.86e-22
24	Xbp1	0.751388	0.541	0.352	0.000507923
24	CG42240	0.747213	0.264	0.095	3.03e-13
24	CR18228	0.744609	0.179	0.007	3.77e-67
24	Obp44a	0.740745	0.22	0.06	0.0317004
24	CG11791	0.714421	0.236	0.055	3.1e-08
24	CG34383	0.705096	0.447	0.262	2.12e-06
24	CG5793	0.700755	0.242	0.091	4.52e-09
24	h	0.687584	0.164	0.004	3.07e-29
24	spi	0.677089	0.434	0.276	0.000793131
24	noc	0.677061	0.299	0.145	2.91e-05
24	pum	0.67695	0.991	0.988	4.59e-23
24	CG3376	0.675167	0.151	0.002	1.22e-94
24	Rab9	0.673738	0.179	0.031	4.49e-17
24	CG10654	0.668139	0.365	0.187	5.13e-15
24	S	0.668084	0.283	0.147	1.33e-11
24	cid	0.666974	0.17	0.01	1.44e-31
24	Pdxk	0.660355	0.261	0.086	4.87e-19
24	Usp15-31	0.657601	0.226	0.069	9.8e-22
24	cry	0.645328	0.173	0.01	2.89e-32
24	CG9467	0.638097	0.173	0.042	3.22e-23
24	Taldo	0.633209	0.189	0.049	1.33e-11
24	bnb	0.626841	0.157	0.024	3.99e-06
24	CR42491	0.624533	0.148	0.007	2.53e-73
24	Hnf4	0.615218	0.132	0.007	3.66e-27
24	fray	0.605649	0.186	0.04	1.46e-27
24	CG33941	0.604846	0.192	0.035	1.83e-18
24	stumps	0.603316	0.148	0.003	4.07e-91
24	Dbi	0.60326	0.138	0.028	0.000272738
24	CG32195	0.600449	0.145	0.009	4.01e-25
24	CR31044	0.598982	0.132	0.005	5.95e-30
24	Sodh-2	0.596607	0.154	0.024	3.45e-11
24	whd	0.588145	0.176	0.049	6.58e-13
24	PH4alphaEFB	0.587038	0.296	0.147	1.92e-07
24	CG3091	0.57984	0.132	0.011	2.15e-16
24	Dll	0.577303	0.151	0.003	1.26e-81
24	CG7341	0.570747	0.135	0.011	1.79e-33
24	CG4404	0.569901	0.277	0.139	0.000493359
24	sty	0.569408	0.594	0.437	0.000679101
24	Jheh3	0.563067	0.138	0.005	6.83e-42
24	edl	0.560552	0.107	0.003	9.22e-43
24	GlcAT-P	0.560188	0.491	0.335	0.00261569
24	CG6912	0.556208	0.258	0.139	0.000874682
24	CG7834	0.544178	0.157	0.043	2.36e-06
24	Mes2	0.542426	0.104	0.004	2.32e-48
24	CG42788	0.540468	0.217	0.09	4.32e-09
24	IP3K2	0.539872	0.119	0.002	2.09e-55
24	mrj	0.537015	0.352	0.228	0.0397598
24	regucalcin	0.530625	0.226	0.078	0.00532371
24	kuk	0.529759	0.208	0.104	0.000337931
24	Tctp	0.527022	0.629	0.485	0.0370379
24	CG31344	0.523111	0.223	0.121	0.000516164
24	PGRP-LA	0.519795	0.119	0.008	1.27e-09
24	CG33054	0.514061	0.217	0.109	2.49e-05
24	Galk	0.513621	0.154	0.03	2.05e-25
24	jar	0.513442	0.211	0.085	6.86e-07
24	CG2493	0.512664	0.116	0.007	8.04e-21
24	CR45251	0.511307	0.113	0.006	1.02e-29
24	Cyp12a4	0.509788	0.132	0.007	3.36e-18
24	kibra	0.509527	0.138	0.026	3.75e-20
24	CG5541	0.504796	0.119	0.002	9.83e-72
25	D	1.37837	0.485	0.012	1.46e-40	neuronal
25	beat-Ia	1.19718	0.579	0.277	2.21e-33
25	SoxN	1.06603	0.537	0.071	1.92e-25
25	tey	1.06032	0.505	0.052	4.94e-22
25	CG31814	1.0218	0.489	0.141	7.47e-27
25	Gad1	1.01156	0.961	0.538	7e-15
25	CG17839	0.911426	0.644	0.256	4.11e-27
25	Sox21b	0.860591	0.343	0.006	1.44e-84
25	CG18599	0.855751	0.304	0.003	1.02e-189
25	CG34155	0.817299	0.405	0.127	1.87e-06
25	CG14989	0.782962	0.994	0.818	4.75e-11
25	CR45141	0.750106	0.307	0.036	1.74e-19
25	dpr10	0.718461	0.485	0.216	7.75e-25
25	svp	0.710647	0.34	0.059	2.64e-10
25	Cngl	0.695711	0.994	0.883	8.95e-34
25	CG34351	0.676475	0.443	0.158	4.77e-09
25	GluRIB	0.651068	0.761	0.462	3.28e-23
25	GluRIA	0.630616	0.553	0.293	4.93e-18
25	vg	0.590372	0.298	0.053	0.0243917
25	VGAT	0.574418	0.576	0.272	1.46e-18
25	CG42342	0.573628	0.738	0.475	5.75e-08
25	CG7582	0.568019	0.673	0.392	1.9e-27
25	CG4328	0.559338	0.236	0.055	6.76e-05
25	Fas3	0.510923	0.401	0.172	6.09e-10
25	dpr1	0.510222	0.644	0.459	5.16e-08
25	dpr17	0.504397	0.466	0.294	1.01e-09
26	CG4328	1.2298	0.612	0.05	6.79e-39	neuronal
26	Lmx1a	1.16751	0.521	0.031	1.8e-43
26	Gad1	0.876428	0.971	0.538	3.53e-17
26	Fer3	0.818287	0.388	0.022	2.84e-32
26	CG14989	0.762169	0.997	0.818	1.62e-16
26	CR45223	0.631657	0.243	0.054	0.00439371
26	Imp	0.630479	0.731	0.318	1.26e-06
26	VGAT	0.565794	0.638	0.272	7.28e-32
26	mamo	0.557872	0.874	0.472	2.68e-05
27	CG7191	2.75282	0.235	0.026	5.22e-10	neuronal
27	spab	1.73492	0.614	0.148	2.05e-32
27	CG31221	1.5654	0.974	0.664	1.21e-52
27	rad	1.44295	0.944	0.361	1.18e-50
27	IA-2	1.43546	1	0.875	1.3e-110
27	Ddc	1.4062	0.971	0.485	4.96e-56
27	heph	1.34604	0.928	0.335	8.6e-34
27	otp	1.30324	0.379	0.042	2.6e-15
27	jeb	1.27545	0.967	0.606	8.81e-62
27	Pcd	1.2687	0.863	0.307	2.14e-78
27	Hsp67Bc	1.21755	0.503	0.107	9.4e-19
27	beat-VII	1.20084	0.683	0.237	3.24e-52
27	Hsp26	1.05236	0.454	0.188	2.36e-10
27	Sytbeta	1.03422	0.673	0.186	2.68e-36
27	Dop2R	1.02687	0.977	0.774	6.65e-37
27	jdp	0.993774	0.761	0.357	1.6e-30
27	CG1275	0.967318	0.601	0.197	6.01e-38
27	CG2269	0.964496	0.928	0.626	3.16e-48
27	CG4577	0.942175	0.435	0.206	1.54e-11
27	Con	0.932937	0.81	0.381	1.07e-30
27	Hsp23	0.921445	0.386	0.135	8.58e-09
27	CG14762	0.917602	0.712	0.304	4.69e-31
27	CG43729	0.860599	0.935	0.59	7.77e-43
27	prim	0.857756	0.637	0.227	2.04e-35
27	CG18467	0.841257	0.631	0.243	9.28e-43
27	Rab27	0.791624	0.405	0.091	1.38e-30
27	CG43324	0.789744	0.83	0.483	1.91e-45
27	Eip93F	0.726613	0.435	0.183	7.79e-22
27	Ace	0.706192	0.748	0.531	2.13e-26
27	Dhpr	0.696983	0.493	0.164	5.01e-27
27	Phm	0.693929	0.578	0.251	4.33e-35
27	bma	0.679187	0.337	0.075	3.61e-15
27	CG42541	0.667783	0.755	0.421	3.15e-14
27	FK506-bp2	0.663536	0.739	0.49	4.85e-28
27	CG30116	0.645468	0.533	0.243	2.13e-19
27	Hsp27	0.642659	0.229	0.067	6.88e-05
27	unc-4	0.641779	0.284	0.045	8.79e-16
27	Fife	0.640375	0.601	0.245	3.48e-16
27	Bx	0.637412	0.523	0.289	9.6e-09
27	Gyc89Da	0.614992	0.176	0.01	5.38e-11
27	CG33169	0.595217	0.314	0.065	4.46e-32
27	Rgk2	0.59371	0.242	0.043	3.97e-29
27	unc-13-4A	0.593034	0.542	0.234	2.09e-11
27	igl	0.59007	0.856	0.676	8.89e-09
27	Pde9	0.58899	0.869	0.586	7.93e-28
27	CG43222	0.580683	0.637	0.423	5.97e-15
27	bru3	0.576431	0.967	0.694	1.28e-17
27	Pkc53E	0.566002	0.879	0.562	4.23e-21
27	CG12194	0.565884	0.552	0.298	1.72e-26
27	CanB	0.559198	0.938	0.784	8.41e-33
27	Lim1	0.55114	0.578	0.341	2.82e-06
27	CG9368	0.547245	0.363	0.126	2.62e-25
27	Ptx1	0.544622	0.186	0.037	4.34e-11
27	CG4199	0.53908	0.291	0.071	5.97e-25
27	CG32280	0.534863	0.252	0.044	5.07e-26
27	fax	0.533616	0.771	0.516	3.74e-22
27	Adk2	0.53304	0.592	0.344	4e-19
27	CG13995	0.531322	0.415	0.204	9.76e-16
27	7B2	0.522198	0.935	0.81	2.32e-24
27	Hr38	0.519981	0.301	0.167	5.88e-06
27	emc	0.512208	0.65	0.401	9.22e-12
28	toy	1.17342	0.646	0.103	1.78e-29	neuronal
28	mirr	1.16381	0.603	0.126	2.06e-19
28	CG45781	1.13583	0.401	0.085	4.49e-16
28	CG14989	1.13468	0.987	0.819	1.47e-23
28	Wnt4	1.0829	0.205	0.075	1.42e-05
28	salr	1.0113	0.623	0.13	9.78e-20
28	Imp	0.833711	0.815	0.318	5.08e-07
28	CG34351	0.812297	0.348	0.159	1.68e-12
28	mamo	0.783941	0.97	0.471	0.000381515
28	CG4766	0.751546	0.464	0.11	7.44e-12
28	Gad1	0.750935	0.954	0.538	1.04e-08
28	kek1	0.718199	0.884	0.586	5.02e-19
28	kek3	0.714593	0.53	0.266	3.35e-16
28	mab-21	0.709426	0.507	0.125	8.16e-07
28	CG9650	0.703397	0.248	0.052	1.78e-08
28	dve	0.683967	0.185	0.024	7.63e-09
28	Ptx1	0.680118	0.298	0.036	3.56e-25
28	Eip63F-1	0.667681	0.715	0.38	4.69e-10
28	Dop1R2	0.650792	0.235	0.078	1.57e-12
28	CG31808	0.650777	0.914	0.696	8.06e-27
28	salm	0.629024	0.308	0.067	1.23e-12
28	Tet	0.591782	0.785	0.527	1.43e-30
28	skl	0.586667	0.248	0.112	1.95e-08
28	iab-8	0.556822	0.146	0.028	0.0302274
28	cmpy	0.555426	0.487	0.343	4.78e-12
28	Ubx	0.554749	0.434	0.296	1.81e-05
28	beat-IIa	0.554588	0.715	0.454	8.08e-08
28	Dh44-R1	0.553147	0.215	0.06	4.72e-07
28	side	0.549473	0.695	0.514	5.35e-14
28	zfh1	0.522565	0.222	0.057	5.15e-11
28	beat-IIIb	0.509158	0.652	0.412	9.63e-11
29	mamo	1.22601	0.926	0.471	2.66e-05	neuronal
29	CR45223	1.21748	0.256	0.054	4.55e-05
29	Cngl	1.19639	0.987	0.883	1.3e-50
29	Msp300	1.17554	0.956	0.755	2.56e-51
29	Imp	1.14221	0.788	0.318	5.48e-06
29	para	1.01819	1	0.9	4.65e-34
29	sif	0.998539	0.97	0.86	8.87e-44
29	nAChRalpha7	0.962554	0.906	0.69	1.46e-19
29	cac	0.955537	0.855	0.6	3.57e-33
29	NaCP60E	0.952041	0.936	0.801	1.98e-34
29	inaE	0.937816	0.845	0.598	2.11e-35
29	CG10077	0.908317	0.96	0.85	1.14e-12
29	Sh	0.892014	0.997	0.946	7.26e-31
29	pan	0.876559	0.973	0.859	5.46e-38
29	shep	0.870212	0.993	0.972	2.06e-20
29	nAChRalpha5	0.840766	0.869	0.688	3.18e-18
29	mmd	0.840109	0.761	0.522	1.16e-16
29	Lar	0.839007	0.916	0.762	1.1e-29
29	nAChRbeta1	0.829836	0.966	0.889	8.77e-27
29	luna	0.825095	0.66	0.481	6.32e-08
29	Rbp1-like	0.804969	0.838	0.687	0.0053257
29	shakB	0.79907	0.899	0.775	3.95e-13
29	Rdl	0.797514	0.997	0.971	1.57e-23
29	tutl	0.795662	0.808	0.649	2.39e-12
29	cindr	0.789706	0.949	0.859	2.78e-23
29	eag	0.788846	0.545	0.35	5.38e-06
29	Prosap	0.787756	0.889	0.725	6.52e-24
29	Nckx30C	0.781541	0.882	0.729	7.55e-07
29	Nlg3	0.772709	0.771	0.643	3.03e-10
29	DIP-alpha	0.763136	0.165	0.059	0.0526937
29	Cp110	0.760691	0.687	0.502	5.57e-20
29	CG1677	0.746068	0.855	0.703	4.25e-19
29	Syp	0.744921	0.966	0.908	4.54e-13
29	CG42260	0.742072	0.791	0.651	3.71e-13
29	CG43707	0.736851	0.512	0.318	1.99e-13
29	Hk	0.736619	0.976	0.88	1.27e-09
29	CG45263	0.735816	0.785	0.667	0.000162018
29	CR45312	0.734451	0.34	0.241	0.00220012
29	CG34383	0.728848	0.451	0.262	3.54e-09
29	CG17716	0.72872	0.64	0.467	5.43e-05
29	GluClalpha	0.723514	0.653	0.518	2.92e-05
29	SK	0.723185	0.754	0.598	5.11e-10
29	CG42342	0.721094	0.67	0.476	0.0406509
29	sdt	0.713653	0.801	0.666	7.16e-11
29	slo	0.711314	0.926	0.807	2.33e-14
29	CG17816	0.707027	0.68	0.536	0.0317612
29	Ptp99A	0.693105	0.879	0.759	1.76e-07
29	nAChRalpha6	0.69188	0.889	0.812	7.96e-06
29	Octbeta3R	0.683672	0.495	0.324	3.33e-08
29	CG15449	0.681716	0.3	0.144	1.5e-13
29	Syt1	0.681145	0.976	0.904	0.000126068
29	CG42313	0.679916	0.535	0.381	0.0059762
29	Glut1	0.678753	0.529	0.331	5.42e-06
29	kek1	0.67821	0.7	0.588	0.00892954
29	CG4587	0.677935	0.616	0.453	9.98e-06
29	nAChRalpha3	0.669887	0.66	0.526	3.16e-05
29	Ca-alpha1D	0.665596	0.609	0.431	2.12e-10
29	plum	0.662765	0.481	0.34	2.31e-08
29	unc-13	0.659301	0.976	0.924	2.9e-11
29	dysc	0.659036	0.97	0.895	8.32e-13
29	Mkp3	0.657637	0.791	0.701	5.14e-07
29	CG42750	0.656604	0.724	0.59	9.99e-07
29	Rbp	0.649694	0.582	0.424	9.48e-08
29	Myo81F	0.64723	0.205	0.089	0.00211831
29	CG11000	0.643834	0.734	0.579	1.49e-06
29	mura	0.64156	0.488	0.341	0.00019231
29	klar	0.630054	0.616	0.473	3.92e-06
29	pum	0.627646	1	0.988	1.28e-13
29	capu	0.62698	0.559	0.397	3.76e-06
29	ab	0.621593	0.542	0.396	0.007486
29	pre-rRNA:CR45845	0.620559	0.222	0.099	7.91e-11
29	CG31712	0.619485	0.808	0.708	0.001408
29	CG42668	0.615762	0.559	0.395	0.00133181
29	RhoGAP100F	0.609481	0.441	0.264	7.1e-06
29	mei-P26	0.607988	0.99	0.967	5.68e-09
29	nAChRalpha1	0.606965	0.542	0.385	0.00055009
29	Shab	0.592842	0.421	0.29	5.3e-06
29	Rim	0.586895	0.906	0.793	0.000898407
29	Rbfox1	0.578866	0.963	0.881	0.00863092
29	CG42613	0.577284	0.747	0.651	0.00219718
29	Frl	0.572929	0.677	0.53	4.72e-06
29	CR43459	0.567579	0.259	0.102	7.3e-10
29	pico	0.566409	0.471	0.339	8.11e-05
29	Uhg5	0.563809	0.529	0.426	0.000798171
29	dpr6	0.563642	0.532	0.408	0.0262433
29	app	0.550907	0.286	0.16	0.0088299
29	Liprin-gamma	0.55005	0.872	0.809	1.04e-06
29	CG1578	0.548123	0.32	0.2	0.00509453
29	Ten-a	0.546669	0.963	0.918	0.0250548
29	CR45332	0.535508	0.242	0.121	0.00258587
29	CG16791	0.535236	0.552	0.425	0.0111189
29	nrm	0.533691	0.323	0.195	0.00182915
29	CG34113	0.531465	0.343	0.219	0.0169572
29	ths	0.529441	0.306	0.173	0.00657788
29	sbb	0.517713	0.963	0.917	0.00472702
29	CG13284	0.509458	0.202	0.094	0.000927279
30	pb	1.6243	0.686	0.041	7.24e-10	neuronal
30	sr	1.30199	0.642	0.155	4.28e-28
30	CR43716	1.14001	0.25	0.003	6.63e-07
30	Gad1	1.12901	0.983	0.538	1.38e-20
30	tey	0.983508	0.503	0.053	1.18e-21
30	CG4577	0.932189	0.47	0.206	7.62e-07
30	H15	0.880735	0.399	0.041	3.03e-20
30	CG32052	0.879533	0.784	0.337	2.41e-28
30	CG34155	0.878042	0.534	0.126	3.96e-10
30	CG30497	0.868637	0.682	0.388	1.85e-32
30	CG14989	0.855352	1	0.818	9.05e-11
30	CG32017	0.828406	0.916	0.649	1.92e-27
30	CG17839	0.752361	0.463	0.259	1.81e-13
30	trh	0.691179	0.253	0.02	9e-24
30	CG10804	0.69039	0.929	0.588	2.37e-21
30	Hasp	0.686881	0.953	0.872	3.38e-41
30	Hr38	0.639431	0.392	0.166	3.99e-07
30	Ac78C	0.631164	0.22	0.042	4.26e-15
30	DIP-delta	0.603691	0.605	0.328	3.27e-14
30	Cngl	0.598101	0.993	0.883	1.89e-24
30	VGAT	0.587057	0.581	0.272	4.1e-14
30	CG42342	0.582645	0.824	0.474	1.29e-08
30	Fer3	0.580872	0.236	0.024	5.45e-14
30	br	0.580172	0.341	0.16	7.8e-05
30	CG32225	0.573129	0.564	0.289	6.34e-18
30	CG9896	0.570497	0.253	0.085	0.0155099
30	SP1029	0.562189	0.176	0.017	0.0255389
30	DIP-theta	0.550591	0.284	0.128	2.59e-05
30	cpx	0.540868	1	0.966	1.77e-23
30	hig	0.53808	0.743	0.545	1.2e-14
30	RNASEK	0.532491	0.997	0.988	9.57e-33
30	CG2269	0.525079	0.861	0.627	6.66e-07
30	CG9109	0.522801	0.186	0.016	0.0308246
30	CG16833	0.521959	0.395	0.207	6.83e-21
30	CG32544	0.521847	0.527	0.399	1.12e-13
30	Nlg4	0.515217	0.473	0.235	2.22e-14
30	CG14186	0.512529	0.389	0.182	2.74e-15
30	CG1607	0.511499	0.51	0.288	8.34e-16
30	Atox1	0.50257	0.831	0.621	1.66e-19
31	pb	1.65225	0.61	0.042	2.24e-12	neuronal
31	CG1402	1.03362	0.481	0.12	5.13e-19
31	CG14989	1.02379	0.993	0.819	3.94e-31
31	Ets65A	0.998892	0.573	0.074	1.41e-40
31	mamo	0.98584	0.969	0.471	1.69e-14
31	Gad1	0.910232	0.98	0.538	6.18e-27
31	Bx	0.886492	0.675	0.288	4.91e-41
31	DIP-alpha	0.871811	0.231	0.058	2.73e-08
31	beat-VII	0.831037	0.58	0.238	1.39e-31
31	CG43689	0.830045	0.305	0.071	1.38e-07
31	grn	0.821431	0.671	0.16	8.83e-17
31	aop	0.751946	0.624	0.311	2.94e-103
31	dve	0.679306	0.186	0.024	7.63e-06
31	dpr18	0.665002	0.546	0.317	1.69e-19
31	CG8861	0.652406	0.688	0.416	4.37e-12
31	CG9674	0.652355	0.705	0.418	2.26e-61
31	Lim1	0.647288	0.797	0.339	5.74e-18
31	Dr	0.626667	0.308	0.036	4.19e-23
31	CG9650	0.620566	0.224	0.052	2.39e-05
31	mbl	0.583019	0.942	0.802	3.23e-17
31	tna	0.581512	0.956	0.722	2.45e-40
31	CG30419	0.568659	0.268	0.094	5.95e-12
31	Imp	0.567175	0.769	0.318	9.15e-06
31	CG10804	0.563197	0.861	0.588	2.11e-38
31	CG32700	0.553009	0.41	0.186	1.93e-13
31	sm	0.55298	0.949	0.835	1.11e-52
31	Gfrl	0.546529	0.434	0.342	9.13e-41
31	Sox21a	0.51454	0.156	0.006	1.57e-23
32	Hsp26	2.39836	0.963	0.182	6.37e-53	neuronal
32	Hsp23	2.14829	0.834	0.13	5.41e-47
32	Hsp27	1.95212	0.783	0.061	1.96e-48
32	Hsp70Bc	1.84515	0.688	0.049	9.03e-48
32	Hsp68	1.66722	0.62	0.107	1.64e-75
32	Abd-B	1.38065	0.38	0.062	0.00047834
32	Hsp67Bc	1.30868	0.454	0.108	5.55e-23
32	tra	1.08911	0.366	0.151	9.43e-21
32	Dop2R	0.815302	0.939	0.775	1.3e-23
32	DnaJ-1	0.799272	0.525	0.223	3.73e-53
32	Wnt4	0.788823	0.288	0.074	0.000455519
32	jdp	0.788178	0.573	0.36	5.14e-17
32	iab-8	0.747912	0.227	0.027	3.41e-07
32	Cbp53E	0.688427	0.858	0.725	5.28e-12
32	Hr38	0.599215	0.488	0.165	4.12e-08
32	abd-A	0.587367	0.271	0.074	0.00433608
32	CG30497	0.567742	0.685	0.388	4.44e-20
32	bru3	0.555722	0.908	0.695	1.12e-21
32	Imp	0.546676	0.614	0.32	5.05e-05
32	Hsp67Ba	0.546015	0.38	0.132	9.98e-12
32	FK506-bp2	0.522471	0.712	0.491	2.25e-16
32	CG43689	0.521455	0.2	0.072	0.0107768
32	prim	0.513331	0.495	0.228	1.88e-14
32	7B2	0.512121	0.936	0.811	1.75e-19
33	bi	2.24108	0.959	0.088	2.13e-20	neuronal
33	sv	1.49228	0.527	0.03	2.5e-33
33	sNPF	1.45136	0.442	0.106	0.00273964
33	heph	1.32023	0.752	0.338	1.29e-14
33	CG43689	1.28292	0.415	0.069	9.76e-06
33	DIP-beta	1.17488	0.493	0.093	2.52e-15
33	DIP-eta	1.13399	0.466	0.078	6.62e-05
33	Ddc	1.12292	0.871	0.487	1.41e-13
33	Ets65A	1.07748	0.429	0.076	2.99e-16
33	vvl	1.01486	0.714	0.311	1.27e-06
33	side	0.90356	0.806	0.513	1.71e-12
33	rad	0.831415	0.673	0.364	0.0403026
33	dpr6	0.75427	0.595	0.407	1.39e-08
33	Fas3	0.709628	0.388	0.172	8.55e-05
33	St3	0.667055	0.609	0.454	0.000252362
33	Adk2	0.623581	0.476	0.346	0.000154095
33	aop	0.612711	0.463	0.312	0.00118411
33	CG42540	0.590547	0.626	0.435	0.021242
33	CG44838	0.580348	0.561	0.427	0.00373227
33	NK7.1	0.544301	0.293	0.143	0.000943408
33	Nlg4	0.53131	0.34	0.236	0.0523687
34	bi	1.71618	0.848	0.09	1.81e-11	neuronal
34	sv	1.46224	0.557	0.03	3.21e-36
34	Ets65A	1.26728	0.521	0.075	1.4e-29
34	CG2016	1.23527	0.145	0.011	0.000333145
34	SoxN	1.13352	0.44	0.073	9.67e-16
34	CG13287	0.852512	0.262	0.015	3.77e-26
34	CG5107	0.793996	0.216	0.007	6.82e-14
34	luna	0.775391	0.759	0.48	4.71e-10
34	CG17278	0.710459	0.152	0.015	0.0456055
34	CG13229	0.694983	0.213	0.05	3.13e-07
34	dpr6	0.664709	0.596	0.407	4.91e-09
34	ChAT	0.661492	0.426	0.191	1.22e-08
34	VAChT	0.641989	0.617	0.317	0.00081931
34	mspo	0.632119	0.734	0.464	0.000595896
34	Octbeta1R	0.585159	0.23	0.088	0.000167934
34	CG2082	0.555878	0.358	0.234	0.00863245
34	Or63a	0.540751	0.188	0.059	1.82e-05
34	Nlg4	0.526473	0.394	0.236	5.51e-05
35	acj6	2.19954	0.956	0.062	3.42e-19	neuronal
35	otp	1.5447	0.551	0.04	6.62e-20
35	rdgA	1.5229	0.679	0.268	1.51e-23
35	slou	1.50163	0.518	0.017	3.73e-50
35	CG42458	1.45377	0.599	0.094	1.41e-22
35	Sytbeta	1.4469	0.697	0.186	8.94e-46
35	Drep3	1.36033	0.471	0.083	3e-16
35	spab	1.20679	0.533	0.149	3e-06
35	heph	1.14157	0.869	0.337	7.98e-15
35	eys	1.13262	0.814	0.414	1.96e-34
35	Antp	1.11282	0.883	0.552	1.95e-23
35	jeb	1.09688	0.832	0.608	2.8e-19
35	Lim1	0.984325	0.807	0.339	2e-21
35	Pvf3	0.966367	0.865	0.564	8.97e-22
35	CG42750	0.933864	0.828	0.589	2.3e-30
35	CG31221	0.927557	0.942	0.665	8.21e-09
35	mspo	0.913278	0.726	0.464	3.77e-16
35	pdm3	0.886579	0.453	0.177	1.91e-20
35	CG42540	0.83518	0.704	0.435	1.16e-26
35	ct	0.816151	0.405	0.13	1.04e-11
35	CG43795	0.771722	0.274	0.086	1.35e-18
35	unc-4	0.698842	0.27	0.045	1.51e-12
35	Hs3st-A	0.682694	0.69	0.476	1.95e-13
35	CR45312	0.682138	0.504	0.24	5.07e-06
35	Hsromega	0.68129	1	0.99	1.62e-21
35	dpr1	0.679234	0.635	0.459	2.71e-07
35	igl	0.67843	0.872	0.676	2.33e-12
35	CG43658	0.676296	0.38	0.162	3.11e-05
35	RapGAP1	0.676249	0.653	0.409	5.34e-06
35	tna	0.653779	0.923	0.722	1.53e-16
35	CG10089	0.634752	0.266	0.186	6.14e-19
35	Epac	0.626579	0.27	0.073	1.84e-16
35	LpR1	0.625574	0.456	0.292	1.04e-07
35	CG4341	0.625411	0.391	0.204	8.95e-10
35	Sytalpha	0.600593	0.391	0.166	2.12e-05
35	bru1	0.596371	0.303	0.134	5.21e-10
35	scrt	0.591068	0.964	0.816	4.08e-12
35	CG33298	0.590639	0.336	0.14	3.96e-17
35	smal	0.587549	0.299	0.116	1.03e-12
35	Dscam2	0.584786	0.92	0.729	1.31e-15
35	CG8248	0.574677	0.398	0.19	3.97e-10
35	CG14762	0.572172	0.569	0.306	0.00365771
35	cpo	0.566292	0.901	0.764	1.08e-13
35	Fas3	0.56109	0.38	0.172	0.00243638
35	pros	0.556282	0.974	0.835	0.000413999
35	CG3726	0.553103	0.438	0.26	0.00183756
35	roX2	0.534125	0.58	0.476	3.19e-05
35	Rgk1	0.533036	0.401	0.313	0.00392736
35	dpr6	0.532547	0.664	0.406	1.68e-06
35	St3	0.532401	0.657	0.454	1.43e-06
35	FK506-bp2	0.531943	0.646	0.491	0.00734703
35	CG42541	0.521203	0.741	0.421	0.008064
35	beat-VI	0.519244	0.42	0.249	0.000216777
35	CCAP-R	0.510392	0.161	0.055	0.0263583
35	Rbp6	0.506259	0.982	0.91	0.000138466
35	CG32982	0.50196	0.456	0.29	0.00433498
36	twit	3.19987	0.996	0.093	7.66e-67	neuronal
36	CG42394	2.85281	0.989	0.157	7.77e-115
36	Proc	2.84146	1	0.353	1.59e-158
36	CG14274	2.64883	0.963	0.081	3.11e-89
36	rhea	2.16713	0.989	0.162	4.26e-115
36	Gr28b	1.91769	0.125	0.01	2.94e-29
36	AnxB9	1.78748	0.733	0.068	1.71e-59
36	lbm	1.66365	0.747	0.024	1.74e-51
36	Fas2	1.61922	0.927	0.394	1.15e-108
36	SP1173	1.57729	0.813	0.025	6.99e-104
36	CG1402	1.55874	0.927	0.116	3.74e-52
36	CG10527	1.53435	0.648	0.285	9.81e-73
36	nolo	1.51268	0.85	0.186	5.25e-138
36	Tsp42Ef	1.39497	0.696	0.033	2.99e-143
36	CG1572	1.37968	0.641	0.024	3.65e-24
36	CG1648	1.32614	0.659	0.238	5.76e-101
36	cv-2	1.26474	0.516	0.044	6.89e-53
36	mbl	1.2303	1	0.802	2.59e-95
36	foxo	1.21569	0.575	0.015	9.72e-28
36	CG13506	1.16085	0.832	0.206	2.71e-163
36	Aldh	1.1242	0.26	0.029	9.09e-21
36	nord	1.12154	0.59	0.077	6.64e-65
36	Tsp42Ee	1.0412	0.81	0.242	4.82e-213
36	bi	1.00333	0.612	0.093	5.71e-14
36	Atf3	0.995793	0.722	0.134	1.61e-111
36	RapGAP1	0.995543	0.919	0.407	1.45e-104
36	Xrp1	0.954978	0.886	0.311	3.18e-110
36	Trx-2	0.953002	0.963	0.524	4.35e-186
36	CG33543	0.95019	0.853	0.275	1.56e-82
36	vn	0.929243	0.484	0.015	7.55e-111
36	mamo	0.913197	0.989	0.471	1.32e-25
36	CR45223	0.895006	0.462	0.052	3.86e-10
36	beat-Ia	0.876837	0.824	0.275	4.75e-44
36	pix	0.86912	0.864	0.361	2.4e-127
36	CG31345	0.84929	0.703	0.232	2.34e-28
36	Cbp53E	0.839687	0.956	0.724	2.45e-41
36	Imp	0.830372	0.912	0.317	2.94e-22
36	CG11768	0.813521	0.674	0.187	1.59e-69
36	CG8407	0.807414	0.484	0.037	7.25e-133
36	CR31781	0.794957	0.154	0.076	0.000726632
36	CG43737	0.786599	0.982	0.622	1.05e-113
36	Eip63F-1	0.782453	0.85	0.379	1.74e-36
36	vvl	0.775532	0.414	0.314	5.54e-31
36	Nrg	0.774085	0.868	0.436	1.27e-149
36	bru3	0.767662	0.993	0.694	4.15e-70
36	Nmda1	0.759906	0.905	0.479	2.4e-147
36	Vkor	0.756683	0.289	0.018	3.67e-08
36	CG14086	0.751941	0.282	0.008	1.09e-119
36	Abd-B	0.738327	0.227	0.064	0.0418353
36	uzip	0.733253	0.758	0.235	1.15e-138
36	stai	0.730948	1	0.905	6.57e-132
36	CG14207	0.730189	0.791	0.373	3.24e-160
36	Ank2	0.728949	0.952	0.609	9.12e-126
36	abd-A	0.719461	0.432	0.073	9.78e-20
36	AnxB10	0.716273	0.579	0.354	5.34e-90
36	CG42392	0.714261	0.96	0.639	2.53e-115
36	CG1943	0.707767	0.659	0.212	9.53e-115
36	Calr	0.703164	0.883	0.506	1e-104
36	Chmp1	0.70115	0.835	0.378	1.43e-150
36	Dad	0.696227	0.557	0.101	2.21e-129
36	cora	0.679586	0.538	0.13	1.63e-116
36	tsr	0.677063	0.799	0.399	1.13e-115
36	wry	0.653999	0.875	0.517	2.12e-62
36	CG5934	0.643269	0.729	0.263	1.81e-115
36	PHGPx	0.640574	0.842	0.431	6.04e-112
36	CG10098	0.64057	0.806	0.382	3.49e-120
36	CG17816	0.639756	0.912	0.534	5.67e-118
36	CG9947	0.636534	0.681	0.225	6.66e-132
36	CG43689	0.633432	0.41	0.07	2.9e-06
36	beat-VI	0.632945	0.659	0.247	1.18e-47
36	CG8331	0.631728	0.799	0.353	2.28e-100
36	CG31675	0.628481	0.209	0.004	8.68e-12
36	dally	0.619293	0.879	0.413	3.73e-54
36	Cad87A	0.617755	0.502	0.103	8.16e-49
36	babos	0.616558	0.33	0.014	8.73e-56
36	Pka-C3	0.612864	0.198	0.022	0.000600985
36	Wbp2	0.608197	0.714	0.313	1.69e-129
36	Calx	0.604839	0.568	0.181	8.01e-51
36	Appl	0.603939	0.978	0.752	5.56e-120
36	CG14401	0.595364	0.147	0.012	0.00197399
36	CG4502	0.589138	0.648	0.261	2.37e-119
36	CG14322	0.588221	0.392	0.044	7.62e-26
36	CG32944	0.580841	0.516	0.105	3.27e-111
36	betaTub56D	0.572767	0.912	0.7	3.38e-81
36	Con	0.571599	0.707	0.382	9.63e-38
36	CG42817	0.568598	0.549	0.131	1.91e-58
36	Gbp1	0.567732	0.161	0.004	2.37e-36
36	Hsc70-3	0.566111	0.81	0.425	4.97e-80
36	CG14044	0.565593	0.245	0.011	1.64e-25
36	CG7781	0.562946	0.982	0.732	2.37e-149
36	CG18549	0.561663	0.729	0.291	6.09e-87
36	CG17841	0.557976	0.549	0.208	5.98e-67
36	cathD	0.557756	0.824	0.461	5.86e-95
36	skl	0.555095	0.403	0.111	9.2e-32
36	zfh1	0.544203	0.282	0.056	1.72e-39
36	CG3556	0.543463	0.839	0.446	1.78e-74
36	FMRFaR	0.542088	0.498	0.15	9.38e-25
36	Rab2	0.53691	0.934	0.608	6.95e-103
36	CG33995	0.536193	0.919	0.672	5.17e-122
36	Cow	0.530048	0.879	0.481	1.22e-81
36	CG8026	0.529404	0.692	0.323	1.36e-92
36	Dic1	0.529233	0.747	0.321	1.15e-83
36	Ptp36E	0.51996	0.597	0.201	1.65e-85
36	eEF2	0.518602	0.945	0.68	7.16e-89
36	CG5174	0.51853	0.821	0.407	3.73e-96
36	CG9743	0.517606	0.15	0.016	0.00101234
36	elm	0.515147	0.886	0.515	1.27e-92
36	CG7029	0.51434	0.645	0.225	5.08e-76
36	CG3014	0.501861	0.315	0.012	3.67e-83
36	CG10970	0.501312	0.198	0.006	9.86e-44
36	Spn55B	0.501194	0.377	0.063	2.38e-74
37	DIP-eta	2.25732	0.717	0.075	3.26e-39	neuronal
37	grn	1.82387	0.886	0.158	1.29e-43
37	CG31997	1.05136	0.721	0.27	3.33e-14
37	hig	1.04914	0.787	0.545	7.28e-27
37	CG43902	0.972969	0.511	0.188	3.21e-09
37	plum	0.930072	0.673	0.338	3.49e-44
37	CG31221	0.851373	0.989	0.664	9.45e-05
37	VAChT	0.848205	0.75	0.315	7.04e-10
37	beat-IIIb	0.822068	0.724	0.412	1.93e-16
37	zld	0.808918	0.669	0.314	2.11e-21
37	RapGAP1	0.796019	0.743	0.408	3.16e-13
37	dpr10	0.783267	0.467	0.217	7.78e-17
37	kek1	0.764438	0.89	0.586	5.32e-12
37	HGTX	0.731053	0.29	0.03	1.11e-18
37	pdm3	0.704456	0.456	0.177	1.11e-12
37	Lim1	0.674837	0.717	0.34	5.73e-07
37	fred	0.672923	0.46	0.225	5.54e-10
37	CG42339	0.671055	0.283	0.103	2.59e-14
37	CG14762	0.665374	0.607	0.306	6.3e-07
37	dati	0.663648	0.882	0.554	2.85e-17
37	CR44024	0.640294	0.838	0.552	3.75e-17
37	ed	0.622365	0.346	0.145	1.79e-09
37	CG32052	0.593781	0.555	0.34	0.000260034
37	ST6Gal	0.59075	0.213	0.066	7.15e-05
37	CG32264	0.579797	0.908	0.78	3.78e-06
37	ChAT	0.576779	0.423	0.191	6.32e-05
37	beat-IIIa	0.572248	0.327	0.15	2.49e-07
37	CG12484	0.569689	0.309	0.108	3.67e-13
37	CG42342	0.567179	0.794	0.475	0.00248914
37	Fas3	0.565318	0.353	0.173	0.000164459
37	CNMaR	0.541701	0.221	0.049	0.0273677
37	FoxP	0.535718	0.967	0.854	2.19e-20
37	Cngl	0.519091	0.985	0.884	4.83e-06
38	HLH4C	1.52815	0.59	0.047	4.51e-19	neuronal
38	caup	1.48015	0.742	0.108	4.76e-20
38	eve	1.22344	0.41	0.004	9.4e-57
38	ara	1.21226	0.568	0.081	4.31e-21
38	Hr51	1.18048	0.48	0.018	7.93e-28
38	CG14989	0.887161	1	0.819	4.34e-06
38	CR32111	0.808195	0.292	0.036	1.99e-29
38	Gad1	0.778783	0.963	0.539	0.00805959
38	RapGAP1	0.61993	0.609	0.41	3.67e-06
38	AstC-R2	0.6061	0.269	0.107	0.0352569
38	NLaz	0.576635	0.332	0.186	0.0136455
38	CG15765	0.543195	0.661	0.43	0.0307511
38	CG42238	0.529258	0.362	0.268	8.63e-06
38	CCKLR-17D3	0.524344	0.21	0.052	6.23e-08
38	Dat	0.504624	0.387	0.181	1.29e-06
39	kn	1.76984	0.697	0.06	1.88e-13	neuronal
39	caup	1.48588	0.697	0.109	7.21e-17
39	ara	1.27744	0.569	0.081	2.96e-18
39	Lim3	1.19683	0.453	0.065	6.75e-19
39	GluRIB	1.12691	0.678	0.463	6.25e-32
39	CG6154	1.03391	0.472	0.146	1.43e-20
39	zld	0.93109	0.625	0.315	4.62e-15
39	igl	0.888391	0.813	0.676	1.25e-07
39	GluRIA	0.868845	0.483	0.295	1.6e-13
39	CR32111	0.868463	0.285	0.036	1.34e-29
39	CG42458	0.867926	0.375	0.096	0.00315405
39	CG31997	0.86642	0.61	0.271	0.0120108
39	exex	0.865499	0.243	0.015	9.75e-16
39	vvl	0.834205	0.708	0.311	0.0152732
39	LpR1	0.782116	0.521	0.291	4.12e-06
39	rgn	0.740339	0.431	0.2	2.38e-07
39	CG12163	0.733612	0.476	0.281	1.33e-06
39	CG11317	0.693223	0.427	0.236	0.024191
39	Lac	0.675263	0.187	0.022	3.73e-12
39	Rip11	0.627177	0.311	0.161	3.62e-09
39	pdm3	0.554412	0.33	0.179	0.023417
39	Ndae1	0.519759	0.292	0.163	0.000166942
39	CG44837	0.512104	0.247	0.125	0.0102926
40	fru	1.69281	0.739	0.264	2.79e-68	neuronal
40	CG17193	1.31099	0.401	0.06	1.04e-41
40	grn	1.12812	0.681	0.161	3.63e-22
40	TfAP-2	0.897553	0.319	0.007	1.22e-42
40	twz	0.896789	0.272	0.061	6.64e-15
40	bnl	0.855948	0.21	0.047	5.47e-11
40	CG46301	0.812296	0.708	0.393	6.61e-41
40	tra	0.789989	0.315	0.151	8.45e-15
40	unc-4	0.777417	0.354	0.045	8.38e-24
40	Kank	0.731166	0.568	0.33	1.33e-31
40	VAChT	0.688656	0.716	0.316	3.33e-13
40	Dop2R	0.671774	0.949	0.775	7.43e-14
40	Toll-6	0.65592	0.759	0.507	2.76e-24
40	CG31814	0.640841	0.405	0.142	4.05e-13
40	Lim1	0.601904	0.708	0.34	6.45e-12
40	Cat	0.599535	0.152	0.062	1.19e-25
40	Lmpt	0.587725	0.366	0.126	9.39e-07
40	CG11317	0.584316	0.42	0.236	5.21e-10
40	Hs3st-A	0.578661	0.782	0.475	5.42e-20
40	CG8641	0.54558	0.187	0.044	3.89e-14
40	fz2	0.539658	0.541	0.405	6.4e-18
40	CR31451	0.539389	1	0.92	1.04e-26
41	VGlut	1.77647	1	0.339	6.44e-14	neuronal
41	toy	1.47818	0.731	0.104	7.67e-23
41	Drep3	1.35975	0.494	0.084	5.3e-12
41	beat-Ia	1.26788	0.553	0.278	4.14e-12
41	Dr	1.10197	0.34	0.036	6.74e-21
41	msi	1.09385	0.929	0.749	1.21e-41
41	CG32698	1.06282	0.49	0.136	8.41e-13
41	CG30271	1.01154	0.19	0.021	5.85e-08
41	CG3655	1.00861	0.387	0.162	2.8e-18
41	DIP-delta	0.994045	0.526	0.329	8.02e-15
41	NLaz	0.929047	0.478	0.185	1.08e-08
41	Pvf3	0.921034	0.937	0.564	9.39e-11
41	CR44978	0.843329	0.292	0.096	3.47e-13
41	dpr2	0.837198	0.269	0.136	1.93e-15
41	Ets65A	0.831963	0.34	0.077	1.94e-08
41	TyrR	0.828816	0.336	0.121	3.66e-12
41	Lim1	0.827438	0.771	0.34	1.15e-05
41	Rgk1	0.779155	0.569	0.311	6.64e-12
41	CG1688	0.772863	0.383	0.121	1.29e-06
41	jim	0.756527	1	0.982	3.72e-27
41	dati	0.696789	0.85	0.555	1.18e-11
41	PVRAP	0.682716	0.439	0.218	0.0393749
41	CG31814	0.6793	0.34	0.143	0.000460932
41	CG43740	0.648866	0.249	0.07	1.33e-11
41	5-HT1B	0.643095	0.368	0.184	1.11e-05
41	zld	0.622669	0.49	0.316	0.000135714
41	GlcAT-S	0.616933	0.47	0.324	3.02e-07
41	shep	0.612743	0.988	0.972	6.17e-05
41	Lkr	0.603164	0.142	0.023	1.32e-05
41	CG42339	0.600568	0.285	0.103	7.7e-07
41	aop	0.576163	0.486	0.312	7.15e-05
41	zfh2	0.544029	0.209	0.076	0.0531835
41	Pkn	0.540916	0.217	0.1	9.21e-06
41	CG17124	0.540414	0.581	0.476	0.00106508
41	CG11319	0.53815	0.427	0.277	0.016536
41	5-HT2A	0.536507	0.237	0.083	5.23e-08
41	pros	0.524148	0.925	0.836	0.0211153
41	CG44314	0.522118	0.134	0.014	2.41e-14
41	mAChR-A	0.516002	0.407	0.259	0.0414364
42	Imp	1.07731	0.916	0.318	1.7e-16	neuronal
42	mamo	1.03569	0.964	0.472	2.13e-13
42	abd-A	0.916423	0.426	0.073	6.8e-10
42	trn	0.907945	0.542	0.17	2.83e-18
42	CG9650	0.863185	0.323	0.052	5.41e-11
42	CG31221	0.841786	0.861	0.666	4.41e-18
42	Dh31	0.718873	0.219	0.199	0.00312902
42	Lim1	0.714674	0.657	0.341	6.59e-20
42	VAChT	0.7022	0.749	0.316	5.12e-19
42	spab	0.68445	0.339	0.151	0.00032313
42	CG43759	0.681836	0.514	0.233	3.05e-23
42	Dop2R	0.658711	0.932	0.775	2.7e-16
42	tsh	0.657813	0.486	0.191	7.2e-32
42	CG31345	0.640424	0.562	0.234	4.23e-06
42	Hs3st-A	0.629928	0.829	0.474	8.47e-31
42	bru3	0.620697	0.964	0.695	1.21e-18
42	kek1	0.607294	0.853	0.587	1.44e-17
42	CG7708	0.605285	0.442	0.153	7.25e-21
42	Eip63F-1	0.600791	0.677	0.381	3.03e-06
42	beat-IIIc	0.593327	0.629	0.311	7.82e-12
42	Ubx	0.580744	0.434	0.296	5.2e-08
42	Calx	0.578469	0.382	0.183	1.2e-13
42	CG14762	0.572886	0.606	0.306	3.47e-16
42	tna	0.569878	0.94	0.722	5.54e-33
42	ChAT	0.545136	0.494	0.19	1.93e-16
42	CG43222	0.534109	0.701	0.423	1.43e-13
42	CG32052	0.524874	0.641	0.339	1.51e-09
42	Scp2	0.51843	0.59	0.525	0.000969722
43	heph	2.02052	0.928	0.337	3.14e-53	neuronal
43	rad	1.69443	0.956	0.362	4.38e-37
43	Ubx	1.52924	0.761	0.293	1.82e-22
43	Ddc	1.38788	0.98	0.486	2.52e-33
43	beat-VII	1.32988	0.705	0.238	1.59e-38
43	Pcd	1.0865	0.717	0.31	3.28e-27
43	salr	1.01405	0.546	0.132	2.4e-11
43	Hsp67Bc	1.01286	0.39	0.109	9.25e-06
43	Eip93F	1.01017	0.614	0.182	5.58e-14
43	CG13995	0.987089	0.49	0.204	1.11e-39
43	mab-21	0.965768	0.518	0.126	7.51e-07
43	Corin	0.928438	0.554	0.284	1.47e-22
43	Pkc53E	0.920316	0.861	0.563	5.18e-22
43	Adk2	0.906733	0.641	0.344	2.01e-42
43	Pde9	0.874605	0.876	0.587	4.4e-30
43	CG4766	0.868835	0.438	0.111	5.11e-08
43	CG2269	0.867299	0.873	0.627	3.35e-10
43	CG43324	0.841311	0.761	0.484	3.95e-21
43	Con	0.819573	0.757	0.382	2.71e-09
43	CG1275	0.760925	0.466	0.199	3.36e-10
43	CG14459	0.757363	0.279	0.034	4.07e-22
43	Rab27	0.739431	0.351	0.092	1.83e-19
43	crb	0.736828	0.183	0.018	5.17e-16
43	Fife	0.733109	0.562	0.247	1.39e-09
43	Sytbeta	0.722677	0.49	0.189	9.82e-06
43	mirr	0.700403	0.315	0.13	0.0229545
43	Phm	0.685974	0.502	0.252	2.93e-13
43	Ten-m	0.67003	0.518	0.273	3.34e-13
43	IA-2	0.668969	0.984	0.876	3.09e-07
43	pros	0.662713	0.944	0.836	2.91e-05
43	Lim1	0.65495	0.641	0.341	6.09e-05
43	CG17272	0.654499	0.442	0.216	3.44e-13
43	CanB	0.64483	0.904	0.784	1.66e-07
43	CG18467	0.641608	0.478	0.245	4.27e-06
43	CG30116	0.640751	0.45	0.244	5.01e-05
43	CG32280	0.633196	0.247	0.045	4.27e-20
43	sv	0.630706	0.191	0.034	5.67e-05
43	jdp	0.621586	0.657	0.359	0.0511595
43	Bx	0.620553	0.55	0.289	0.000861271
43	bma	0.618846	0.295	0.076	5.87e-07
43	eIF4A	0.610991	0.829	0.784	1.15e-08
43	salm	0.609771	0.275	0.067	8.16e-07
43	NLaz	0.609216	0.351	0.186	0.0161606
43	CG32017	0.609055	0.761	0.651	0.000689061
43	brat	0.601493	0.49	0.259	2.78e-09
43	Dhpr	0.595666	0.359	0.166	3.23e-06
43	nAChRalpha6	0.575178	0.996	0.811	9.92e-06
43	Sesn	0.571265	0.179	0.037	9.09e-14
43	noe	0.566805	1	1	3.77e-16
43	Rgk2	0.532807	0.211	0.043	1.05e-17
43	Tsp66E	0.525741	0.629	0.449	0.000363265
43	Esyt2	0.520409	0.195	0.049	1.24e-11
43	mGluR	0.50239	0.355	0.188	0.000109428
44	Ubx	1.21073	0.799	0.293	1.2e-14	neuronal
44	otp	1.03173	0.43	0.042	2.65e-09
44	mbl	0.933341	0.988	0.802	2.27e-18
44	CG15628	0.907511	0.952	0.791	3.44e-43
44	klu	0.901585	0.402	0.047	1.08e-17
44	Ten-m	0.864029	0.606	0.272	5.89e-32
44	CG14509	0.837045	0.715	0.542	1.53e-33
44	Camta	0.797026	0.446	0.191	2.98e-36
44	CG31997	0.72849	0.542	0.272	1.6e-10
44	tipE	0.727196	0.606	0.321	2.26e-32
44	Hs3st-A	0.708975	0.803	0.475	2.75e-24
44	br	0.608331	0.378	0.16	5.94e-05
44	CG4080	0.554481	0.341	0.16	1.83e-22
44	Pde1c	0.554296	0.45	0.234	1.8e-09
44	Ace	0.550296	0.731	0.532	1.14e-21
44	CG14459	0.546164	0.185	0.035	1.74e-10
44	bxd	0.54298	0.141	0.011	6.31e-13
44	Hk	0.540234	0.952	0.881	7.77e-35
45	rad	1.55802	0.926	0.363	2.15e-38	neuronal
45	Ddc	1.40856	0.992	0.486	7.9e-39
45	CG13408	1.37624	0.333	0.064	4.86e-05
45	CG2269	1.3528	0.963	0.626	3.66e-47
45	CG32017	1.29453	0.971	0.649	5.1e-50
45	Pcd	1.22193	0.798	0.309	5.22e-45
45	CG18467	1.12383	0.671	0.243	1.74e-46
45	unc-13-4A	1.05119	0.65	0.233	4.96e-22
45	beat-VII	1.02331	0.675	0.238	9.4e-23
45	CG4577	1.00519	0.539	0.206	9.62e-07
45	Eip93F	0.980872	0.597	0.182	1.79e-16
45	CG43729	0.944101	0.856	0.592	3.45e-27
45	CG1275	0.940261	0.58	0.198	1.35e-22
45	Corin	0.870687	0.613	0.283	6.97e-33
45	prim	0.829667	0.597	0.228	7.48e-20
45	Nplp1	0.829132	0.7	0.417	0.00302258
45	IA-2	0.803358	0.992	0.876	2.86e-16
45	Rab27	0.787147	0.374	0.092	6.99e-22
45	Fife	0.780086	0.613	0.246	4.92e-13
45	Phm	0.770905	0.556	0.252	1.67e-26
45	Dop2R	0.759465	0.938	0.775	1.6e-07
45	Con	0.74328	0.741	0.382	3.75e-10
45	heph	0.722813	0.683	0.339	5.8e-07
45	7B2	0.68869	0.926	0.811	7.86e-17
45	CG8613	0.654186	0.407	0.193	4.36e-17
45	CG4328	0.651068	0.259	0.055	9.43e-07
45	CG32280	0.615156	0.28	0.044	6.37e-22
45	jdp	0.612006	0.617	0.36	0.00160299
45	CG33169	0.607479	0.272	0.065	4.63e-18
45	Dhpr	0.601883	0.432	0.165	3.72e-11
45	tsh	0.591034	0.387	0.192	5.94e-10
45	Sytbeta	0.588901	0.465	0.189	3.81e-05
45	CG13954	0.58651	0.49	0.27	6.88e-16
45	CG15765	0.566728	0.519	0.432	2.91e-06
45	fax	0.562515	0.774	0.516	1.41e-09
45	CG11317	0.547977	0.399	0.237	0.00249655
45	mAChR-B	0.546139	0.218	0.044	5.59e-14
45	bru3	0.544955	0.979	0.695	0.000478541
45	Ten-a	0.543261	0.992	0.918	1.04e-16
45	svr	0.541401	0.658	0.415	1.27e-10
45	Lmx1a	0.531819	0.21	0.035	0.000388442
45	CG3009	0.528369	0.51	0.385	3.36e-08
45	CG6006	0.527323	0.235	0.058	3.02e-11
45	pdm3	0.524701	0.374	0.178	7.44e-05
45	CG4199	0.519593	0.259	0.072	1.34e-12
45	CG43324	0.519191	0.7	0.485	4.27e-10
45	Cks85A	0.511499	0.251	0.086	2.93e-11
45	CG31475	0.508954	0.321	0.166	2.42e-05
45	Fer3	0.503443	0.156	0.025	0.000211112
45	cmpy	0.501079	0.523	0.343	0.00251886
46	bi	2.03376	0.938	0.09	5.23e-19	neuronal
46	VGlut	1.7987	0.971	0.339	1.12e-19
46	Sp1	1.53472	0.753	0.051	0.000298302
46	svp	1.18879	0.535	0.058	3.36e-21
46	caup	1.03277	0.605	0.11	1.41e-08
46	ara	0.927702	0.403	0.083	4.59e-11
46	Lim3	0.761038	0.37	0.066	1.96e-09
46	cpx	0.682109	1	0.966	1.93e-17
46	CG1358	0.635804	0.313	0.184	0.000848002
46	CG16833	0.635656	0.49	0.206	2.84e-13
46	Teh2	0.583957	0.724	0.456	6.69e-13
46	Tina-1	0.568127	0.708	0.459	3.12e-08
46	hth	0.558711	0.996	0.844	1.38e-07
46	Rack1	0.52491	0.819	0.684	3.72e-10
46	CG34355	0.512267	0.263	0.072	3.01e-06
46	noe	0.512132	1	1	6.97e-27
46	RpL24-like	0.510722	0.868	0.749	2.06e-10
46	RpL5	0.508052	0.996	0.933	4.33e-06
46	shep	0.502273	1	0.972	6.08e-08
47	CG15537	1.88051	0.244	0.056	0.0100305	neuronal
47	HLH4C	1.60789	0.592	0.048	6.14e-14
47	SPR	1.56426	0.563	0.216	7.36e-21
47	Hr51	1.36218	0.479	0.019	5.58e-25
47	Lmpt	1.15218	0.408	0.126	2.86e-08
47	Ptx1	1.08305	0.382	0.036	1.57e-21
47	CG14989	1.07343	0.992	0.819	2.1e-07
47	CG42541	1.03463	0.773	0.421	1.79e-11
47	CG11317	0.986433	0.613	0.235	2e-10
47	Bx	0.913437	0.576	0.289	2.44e-07
47	CG30158	0.816701	0.239	0.098	1.9e-07
47	CG2082	0.790233	0.504	0.233	0.000337931
47	dve	0.77619	0.265	0.024	0.000266916
47	CG4577	0.761546	0.366	0.208	0.000321216
47	heph	0.754797	0.664	0.339	0.00368376
47	CG13229	0.748659	0.176	0.05	2.96e-05
47	CG32017	0.70077	0.857	0.65	1.65e-09
47	Sytalpha	0.689227	0.395	0.167	2.28e-05
47	CG18208	0.636786	0.462	0.266	0.0286505
47	sr	0.633098	0.286	0.16	0.00062589
47	Liprin-gamma	0.588115	0.937	0.808	2.97e-15
47	noe	0.580597	1	1	1.86e-10
47	CG15312	0.56183	0.412	0.257	4.02e-05
47	CG14186	0.552865	0.319	0.183	0.000641764
47	St3	0.537827	0.651	0.454	0.0349098
47	prim	0.524005	0.437	0.23	0.00726036
48	Scp2	1.41537	0.826	0.523	2.07e-36	neuronal
48	Gad1	1.16758	0.992	0.539	1.81e-33
48	DIP-alpha	1.1273	0.479	0.056	2.8e-22
48	Fer2	1.06452	0.61	0.031	1.41e-18
48	Eip63F-1	1.03872	0.877	0.379	7.76e-39
48	Ip259	0.859832	0.953	0.646	1.28e-83
48	Dbx	0.827301	0.398	0.02	3.93e-14
48	nAChRalpha7	0.780311	0.953	0.69	2.25e-62
48	RpL5	0.752484	0.992	0.933	2.82e-79
48	dmrt99B	0.748056	0.352	0.005	9.42e-132
48	CG14989	0.728104	1	0.819	5.78e-18
48	CG15765	0.662181	0.826	0.429	1.55e-28
48	CG32225	0.642693	0.678	0.288	5.52e-48
48	Nckx30C	0.61914	0.945	0.728	4.92e-74
48	cpx	0.618202	1	0.966	6.31e-68
48	Tina-1	0.612802	0.847	0.457	2.25e-61
48	VGAT	0.596612	0.72	0.272	1.65e-48
48	CG32698	0.593493	0.309	0.138	4.07e-17
48	side	0.580337	0.907	0.513	4.64e-41
48	CG16833	0.57841	0.606	0.205	1.94e-52
48	CG9328	0.574396	0.928	0.73	1.43e-76
48	CG7272	0.561239	0.568	0.176	1.79e-32
48	SoxN	0.548574	0.369	0.074	1.64e-08
48	trn	0.536338	0.475	0.171	1.95e-08
48	RpL12	0.522867	0.996	0.895	1.21e-58
48	CG10804	0.511377	0.911	0.588	2.31e-34
49	acj6	1.48706	0.732	0.066	2.64e-12	neuronal
49	mamo	1.46657	0.979	0.472	2.91e-36
49	heph	1.35829	0.843	0.338	1.8e-47
49	mbl	1.27485	0.996	0.802	1.1e-63
49	sens-2	1.23193	0.264	0.033	9.24e-14
49	CR45312	1.21096	0.647	0.239	1.51e-65
49	mab-21	1.06529	0.6	0.125	7.03e-21
49	jdp	1.05536	0.723	0.359	3.3e-41
49	Abd-B	1.03827	0.328	0.063	0.0453182
49	Imp	1.01558	0.932	0.318	1.64e-17
49	spab	1.00267	0.417	0.151	1.74e-09
49	CG31221	0.922095	0.885	0.665	8.6e-28
49	kn	0.912753	0.319	0.064	1.14e-09
49	rdgA	0.908007	0.472	0.27	8.66e-19
49	Fkbp14	0.874149	0.26	0.025	1.05e-13
49	abd-A	0.842912	0.438	0.073	2.39e-12
49	CG14509	0.829062	0.864	0.541	5.27e-47
49	unc-13-4A	0.809626	0.634	0.234	2.14e-31
49	CR44598	0.805328	0.289	0.011	1.56e-07
49	Ca-alpha1T	0.805231	0.6	0.218	2.6e-31
49	CG13408	0.779253	0.213	0.065	6.55e-06
49	CG30116	0.703823	0.596	0.243	1.25e-29
49	CG4766	0.669945	0.494	0.111	5.24e-12
49	DIP-delta	0.661475	0.651	0.328	1.45e-21
49	salr	0.654975	0.396	0.134	3.28e-13
49	cpo	0.652932	0.957	0.764	1.23e-68
49	sm	0.649099	0.97	0.835	1.31e-66
49	CG43729	0.642172	0.847	0.592	7.95e-27
49	iab-8	0.642118	0.196	0.028	7.24e-06
49	CG32683	0.636286	0.498	0.174	1.74e-20
49	CG10384	0.634944	0.421	0.15	9.89e-32
49	CG14762	0.618554	0.66	0.306	3.42e-23
49	Dop1R1	0.615545	0.345	0.082	1.45e-21
49	Hsromega	0.609473	1	0.99	2.17e-84
49	Sema2b	0.60664	0.421	0.206	3.51e-29
49	Nep1	0.605451	0.162	0.025	7.38e-06
49	Ace	0.596248	0.821	0.531	5.59e-40
49	C15	0.591947	0.209	0.021	0.000138448
49	CG9896	0.589906	0.217	0.086	4.47e-07
49	Fife	0.56829	0.604	0.246	2.03e-24
49	salm	0.561185	0.281	0.068	8.46e-17
49	CanA-14F	0.554305	0.834	0.524	2.03e-33
49	rgn	0.553991	0.438	0.2	2.28e-22
49	CG7708	0.55002	0.494	0.153	5.94e-19
49	trv	0.544543	0.936	0.712	2.11e-36
49	ST6Gal	0.538115	0.272	0.066	1.42e-13
49	Btk29A	0.535407	0.46	0.159	1.81e-38
49	mub	0.532364	0.689	0.356	1.63e-48
49	CG8248	0.529758	0.498	0.189	3.27e-49
49	Cam	0.513721	1	0.993	7.17e-75
49	Sox102F	0.510359	0.145	0.003	0.000976022
49	Hsp67Bc	0.509709	0.315	0.11	1.44e-06
49	CG15765	0.506391	0.685	0.431	3.58e-20
49	zfh2	0.50287	0.302	0.075	3.61e-11
50	grn	1.71897	0.906	0.159	1.6e-39	neuronal
50	CG45781	1.61956	0.715	0.083	3.17e-21
50	CG14989	1.36505	0.996	0.819	4.85e-22
50	Gad1	1.12132	0.983	0.539	2.58e-12
50	Bx	0.944101	0.783	0.287	4.33e-22
50	CG12994	0.913461	0.455	0.147	3.69e-12
50	CG8861	0.907045	0.66	0.416	4.38e-12
50	Pvf3	0.900328	0.868	0.565	1.25e-18
50	elB	0.798333	0.809	0.398	2.53e-29
50	CG32017	0.779582	0.936	0.65	1.22e-11
50	rgn	0.75001	0.545	0.199	4.51e-15
50	Lim1	0.742727	0.83	0.339	1.21e-11
50	Ip259	0.721635	0.902	0.646	3.03e-21
50	VGAT	0.699096	0.604	0.273	1.33e-18
50	CG32052	0.655107	0.596	0.34	0.000218416
50	br	0.642985	0.46	0.159	1.13e-07
50	IA-2	0.639946	0.987	0.876	2.48e-05
50	Dr	0.604886	0.285	0.037	4.47e-10
50	CG42674	0.589463	0.689	0.341	2.93e-06
50	CG3961	0.577584	0.626	0.409	4.39e-11
50	Eip93F	0.545543	0.443	0.184	0.0319873
50	Gabat	0.543007	0.881	0.718	5.45e-11
50	RpL5	0.524202	0.996	0.933	2.76e-09
50	Ets65A	0.517504	0.289	0.078	0.000191967
50	Rbp6	0.506211	0.983	0.91	1.72e-19
51	acj6	2.07612	0.928	0.064	9.9e-13	neuronal
51	kn	1.9331	0.824	0.06	3.56e-16
51	CG34351	1.88277	0.629	0.158	4.87e-59
51	sNPF	1.69145	0.588	0.106	8.22e-05
51	Drep3	1.63497	0.516	0.084	1.04e-20
51	nAChRalpha6	1.46507	1	0.811	5.98e-76
51	dpr1	1.43823	0.887	0.458	4.58e-45
51	Sytbeta	1.34021	0.679	0.187	2.09e-30
51	CG6154	1.33896	0.579	0.146	2.54e-49
51	slou	1.32643	0.439	0.018	1.06e-16
51	otp	1.27839	0.48	0.042	8.71e-09
51	ST6Gal	1.25163	0.362	0.065	1.8e-25
51	CR45312	1.22279	0.652	0.239	8.81e-28
51	CG10384	1.19727	0.543	0.15	7.88e-33
51	rdgA	1.18271	0.769	0.268	8.96e-12
51	CG10089	1.13252	0.48	0.185	3.93e-65
51	CG17193	1.09896	0.367	0.061	5.26e-14
51	CG43658	1.09887	0.462	0.161	1.49e-19
51	CG42458	1.05587	0.326	0.097	2.73e-08
51	CG40486	1.05073	0.163	0.002	1.24e-56
51	CG9896	1.04716	0.281	0.086	1.82e-12
51	CG31323	1.04591	0.425	0.092	1.94e-27
51	Ddc	1.0439	0.86	0.488	1.87e-11
51	CG32683	1.02262	0.525	0.174	4.41e-17
51	heph	1.02241	0.814	0.338	7.99e-09
51	CG8861	1.01939	0.833	0.415	1.31e-06
51	mspo	0.994831	0.833	0.464	5.47e-18
51	Dscam2	0.973867	0.959	0.729	1.74e-44
51	DIP-delta	0.942392	0.67	0.328	1.16e-10
51	cpo	0.92762	0.9	0.764	2.03e-41
51	eys	0.912598	0.747	0.415	1.35e-18
51	Pvf3	0.890194	0.955	0.564	5.59e-13
51	CG42750	0.8675	0.846	0.59	1.64e-26
51	unc-4	0.865402	0.33	0.045	4.45e-12
51	nAChRalpha2	0.83789	0.489	0.231	7.78e-30
51	roX2	0.835075	0.624	0.476	8.44e-14
51	mub	0.823223	0.629	0.357	1.3e-23
51	Pkc53E	0.808404	0.697	0.565	2.82e-19
51	Lim1	0.783606	0.742	0.34	8.94e-10
51	GluRIB	0.779623	0.719	0.463	1.48e-11
51	jeb	0.765434	0.765	0.609	1.58e-06
51	klg	0.76535	0.86	0.692	4.35e-07
51	pum	0.759922	1	0.988	3.43e-48
51	CG43737	0.75591	0.878	0.623	8.64e-12
51	CG32204	0.755734	0.285	0.066	3.52e-13
51	Antp	0.754461	0.923	0.553	0.000759596
51	RluA-1	0.745283	0.213	0.002	4.94e-106
51	nAChRalpha1	0.743702	0.584	0.385	2.5e-16
51	CG4168	0.734416	0.276	0.084	1.04e-21
51	skl	0.71357	0.312	0.112	0.000146821
51	Gycbeta100B	0.707829	0.353	0.162	8.97e-11
51	Lmpt	0.682802	0.276	0.127	0.00463415
51	emc	0.680988	0.665	0.402	8.68e-07
51	Invadolysin	0.674362	0.317	0.127	2.31e-11
51	CG44838	0.671466	0.652	0.426	3.91e-14
51	CG42541	0.654715	0.71	0.422	0.0359148
51	CG32856	0.646261	0.339	0.154	2.19e-13
51	Fas3	0.642923	0.389	0.173	0.00290331
51	scyl	0.642831	0.665	0.475	3.57e-09
51	CG30424	0.618758	0.312	0.154	0.00206137
51	CG31690	0.61422	0.367	0.166	7.07e-10
51	Ac13E	0.60699	0.186	0.03	1.07e-15
51	Sdc	0.606463	0.86	0.734	7.38e-11
51	mtt	0.605262	0.226	0.096	0.00154688
51	CG3164	0.599792	0.154	0.023	6.41e-15
51	rpr	0.593983	0.217	0.053	2.99e-09
51	CG8248	0.591039	0.38	0.19	1.42e-10
51	CG4341	0.584605	0.421	0.204	7.13e-05
51	St3	0.573998	0.638	0.454	0.00514604
51	CG17124	0.573552	0.67	0.476	3.83e-07
51	tai	0.567494	0.67	0.59	1.35e-14
51	CG2993	0.563343	0.679	0.578	0.000134001
51	miple1	0.552851	0.982	0.947	3.87e-09
51	smal	0.53787	0.267	0.117	2.04e-10
51	Lac	0.536787	0.19	0.023	6.36e-08
51	noe	0.534409	1	1	4.93e-12
51	Epac	0.533561	0.208	0.073	3.08e-09
51	homer	0.523242	0.244	0.108	2.97e-10
51	CG12290	0.520703	0.271	0.102	8.98e-05
51	trn	0.512901	0.267	0.173	0.00322786
51	CG44837	0.501461	0.294	0.125	4.45e-07
52	twit	2.44987	0.986	0.095	7.67e-22	neuronal
52	Proc	2.23724	0.995	0.354	4.59e-74
52	rhea	2.1876	0.995	0.164	6.16e-95
52	CG42394	1.80981	0.877	0.159	1.28e-28
52	AnxB9	1.6774	0.741	0.069	3.3e-40
52	CG10527	1.63654	0.705	0.285	2.5e-76
52	mbl	1.46944	1	0.802	1.48e-102
52	CG1402	1.28723	0.841	0.118	4.27e-27
52	nolo	1.18472	0.805	0.188	2.25e-69
52	CG1648	1.14316	0.595	0.239	7.47e-65
52	CG14274	1.13769	0.705	0.085	1.66e-10
52	beat-IIa	1.10518	0.823	0.454	4.54e-89
52	foxo	1.09911	0.423	0.017	3.89e-15
52	Fas2	1.02431	0.909	0.395	1.06e-45
52	dally	0.9529	0.936	0.414	6.87e-81
52	SP1173	0.931666	0.5	0.03	4.23e-15
52	CG13506	0.90714	0.805	0.207	2.85e-78
52	CG4766	0.876199	0.714	0.109	4.66e-27
52	PHDP	0.860248	0.441	0.026	4.42e-27
52	Xrp1	0.854972	0.873	0.313	2.12e-76
52	pix	0.854605	0.827	0.362	2.01e-103
52	Trx-2	0.848597	0.945	0.525	1.15e-133
52	CG31345	0.834873	0.727	0.233	1.79e-23
52	CG15628	0.833416	0.973	0.791	5.98e-73
52	CR45223	0.825426	0.314	0.054	2.59e-07
52	stai	0.809685	1	0.905	1.96e-123
52	Con	0.783997	0.695	0.383	9.55e-48
52	CG43737	0.77779	0.964	0.623	4.7e-95
52	mab-21	0.771829	0.659	0.125	3.35e-21
52	lbm	0.758936	0.3	0.029	0.00012884
52	ringer	0.756447	0.909	0.492	6.11e-98
52	CG18549	0.741564	0.682	0.292	5.04e-125
52	eEF2	0.721572	0.959	0.68	9.94e-118
52	AnxB10	0.705624	0.582	0.354	9.27e-85
52	tfc	0.68599	0.141	0.011	5.17e-06
52	CG8407	0.668607	0.414	0.038	8.64e-50
52	Ank2	0.665428	0.918	0.61	5.23e-99
52	CG8026	0.65406	0.782	0.323	3.46e-119
52	CG11191	0.654059	0.7	0.278	1.13e-71
52	CG42817	0.646292	0.568	0.132	4.76e-54
52	Tsp42Ef	0.643922	0.409	0.037	2.33e-14
52	CG3556	0.628779	0.891	0.446	2.21e-76
52	CG11768	0.627502	0.641	0.188	5.7e-41
52	Frq1	0.627235	0.991	0.837	1.11e-99
52	TyrRS	0.62404	0.609	0.151	3.68e-79
52	Atf3	0.621463	0.614	0.136	3.1e-42
52	Eip63F-1	0.615208	0.877	0.38	1.85e-22
52	CalpA	0.60365	0.632	0.219	6.49e-68
52	cv-2	0.590054	0.368	0.046	1.02e-10
52	CG33090	0.589203	0.491	0.132	6.92e-68
52	Chmp1	0.584993	0.836	0.379	4.57e-92
52	CG10098	0.583896	0.759	0.383	1.48e-74
52	CG14509	0.579203	0.882	0.541	9.06e-41
52	CG33543	0.578538	0.741	0.277	3.2e-39
52	CG8331	0.574925	0.823	0.353	2.24e-76
52	CG42392	0.573376	0.959	0.64	4.33e-75
52	Cbp53E	0.571845	0.864	0.725	9.3e-23
52	CG14207	0.571817	0.768	0.374	7.77e-97
52	HGTX	0.568095	0.305	0.03	7.13e-30
52	GC1	0.567478	0.773	0.321	8.11e-59
52	Atpalpha	0.565571	1	0.989	8.39e-128
52	betaTub56D	0.554221	0.932	0.7	1.25e-70
52	CG7781	0.553219	0.95	0.733	2.14e-137
52	RpL39	0.547272	0.995	0.962	2.62e-97
52	Nmda1	0.539092	0.855	0.481	9.88e-73
52	eIF3l	0.537169	0.75	0.341	3.13e-52
52	CG43689	0.534354	0.314	0.071	0.000154568
52	alphaTub84B	0.533051	0.977	0.867	1.1e-88
52	nord	0.530091	0.323	0.08	5.51e-17
52	GlcAT-P	0.521544	0.773	0.333	1.13e-55
52	CG1943	0.51424	0.595	0.213	4.82e-54
52	mamo	0.507672	0.745	0.474	3.28e-11
52	Appl	0.500224	0.991	0.752	7e-86
53	DIP-eta	1.42331	0.525	0.078	2.08e-11	neuronal
53	CG31997	1.28588	0.904	0.269	3.04e-20
53	C15	1.27615	0.493	0.019	9.5e-10
53	mab-21	1.22541	0.653	0.125	2.12e-11
53	Lim3	1.22064	0.626	0.064	6.22e-27
53	CG4766	1.08504	0.598	0.11	2.21e-13
53	PHDP	1.05813	0.438	0.026	7.05e-13
53	beat-Ia	0.991367	0.712	0.277	7.47e-12
53	CG34367	0.956316	0.402	0.023	7.68e-21
53	CG15628	0.83506	0.936	0.792	3.07e-24
53	beat-Ic	0.811236	0.685	0.407	1.49e-11
53	GluRIB	0.775353	0.781	0.463	8.9e-19
53	Camta	0.765328	0.479	0.191	2.14e-15
53	CG14509	0.701132	0.795	0.542	4.02e-07
53	CG4080	0.665286	0.402	0.159	8.3e-20
53	mbl	0.661915	0.973	0.802	0.004877
53	Syp	0.640214	0.963	0.908	1.68e-24
53	Cadps	0.610109	0.854	0.652	1.62e-13
53	trv	0.581129	0.909	0.713	1.75e-07
53	CG16779	0.564478	0.895	0.685	1.73e-18
53	CG30158	0.562906	0.292	0.097	4.75e-10
53	Hs3st-A	0.562683	0.744	0.476	6.25e-09
53	kirre	0.557002	0.703	0.498	1.5e-06
53	CanA-14F	0.54785	0.717	0.525	3.96e-05
53	hdc	0.547075	0.877	0.662	4.52e-08
53	Adk1	0.543473	0.589	0.422	6.13e-14
53	Sdc	0.532412	0.927	0.733	3.07e-11
53	dati	0.526423	0.877	0.555	8.93e-13
53	tipE	0.518096	0.543	0.322	0.000259388
53	CG1513	0.515537	0.58	0.347	6.37e-09
53	Atox1	0.505469	0.804	0.622	1.08e-06
54	Dh31	1.95486	0.694	0.195	7.26e-12	neuronal
54	sens-2	1.94928	0.79	0.029	1.74e-25
54	sNPF	1.9056	0.489	0.106	3.96e-05
54	VGlut	1.73844	0.995	0.339	2.46e-23
54	acj6	1.57895	0.735	0.066	4.72e-08
54	Nplp1	1.53373	0.904	0.416	3.28e-34
54	HLH4C	1.5022	0.63	0.048	6.05e-16
54	Drgx	1.39931	0.525	0.015	2.76e-47
54	svp	1.27712	0.612	0.058	1.13e-22
54	rad	1.21076	0.895	0.363	3.84e-22
54	PHDP	1.15669	0.516	0.025	2.83e-18
54	Lim3	1.08612	0.543	0.065	1.69e-22
54	CG32017	0.983304	0.959	0.65	1.13e-29
54	jdp	0.942056	0.557	0.36	1.8e-17
54	CG13739	0.891912	0.877	0.446	5.3e-27
54	tup	0.851512	0.361	0.022	5.3e-20
54	CG32700	0.792561	0.53	0.185	5.32e-12
54	DIP-beta	0.781532	0.402	0.095	2.53e-07
54	CG34355	0.772246	0.393	0.071	4.14e-23
54	CG42339	0.742581	0.388	0.102	8.23e-19
54	5-HT1A	0.742518	0.699	0.321	2.12e-19
54	hdc	0.707876	0.89	0.662	2.51e-16
[truncated: 5,449 more rows]
