# Supplementary material for: A single-cell transcriptomic atlas of the adult Drosophila ventral nerve cord
Source: eLife. 2020 Apr 21;9:e54074. doi: 10.7554/eLife.54074 (PMC7173974; doi:10.7554/eLife.54074)
Supplement: Figure 1—source data 2. — Neuronal cluster summary includes number of cells, number of significantly enriched cluster markers (average log-fold change >0.5, adjusted p-value<0.05), number of unique cluster markers, neurotransmitter identity, predicated hemilineage designation, enriched peptide encoding genes, and enriched Hox gene expression. Non-neuronal cluster summary includes number of cells, number of significantly enriched cluster markers, number of unique cluster markers and predicated cell type. [file elife-54074-fig1-data2.xlsx]

## Sheet: Neuronal Clusters
Neuronal Cluster	Cell Number	No. Cluster Markers	No. Unique Markers	Neurotransmitter	Predicted hemilineage	Enriched Peptides	Enriched Hox
0	623	20	0	acetylcholine	4B	AstA, sNPF
1	552	15	0	glutamate	21A
2	503	15	0	acetylcholine			Ubx
3	500	15	0	GABA	5B/6B		Antp
4	489	34	0	mixed		Dh31, spab	abd-A, Abd-B
5	477	22	1	glutamate	16B
6	471	13	0	glutamate	8A/24B		Antp
7	466	22	0	acetylcholine			Ubx
8	454	15	0	acetylcholine	8B
9	440	15	1	GABA	6A
10	434	21	2	acetylcholine		Dh31, spab
11	425	19	1	acetylcholine
12	421	23	0	GABA	1B		Antp
13	413	17	0	glutamate	14A
14	391	16	0	acetylcholine	20A/22A
15	385	17	0	glutamate
16	384	17	1	acetylcholine	1A
17	379	36	0	GABA	13B
19	347	34	2	GABA	13A/19A
20	344	17	1	GABA	5B/6B
21	341	22	0	acetylcholine
22	327	34	1	GABA	0A		Ubx
25	309	26	1	GABA	13B
26	309	9	0	GABA
27	306	61	1			spab
28	302	31	1	GABA	6A		Ubx
29	297	96	20
30	296	39	3	GABA	12B
31	295	28	0	GABA	9A
32	295	24	3				abd-A, Abd-B
33	294	21	0		20A/22A	sNPF
34	282	18	3	acetylcholine	20A/22A
35	274	56	2	acetylcholine	23B	spab	Antp
36	273	111	14	glutamate	15B	Proc	abd-A, Abd-B
37	272	33	2	acetylcholine
38	271	15	2	GABA	11B
39	267	23	2	acetylcholine	10B
40	257	22	2	acetylcholine
41	253	39	1	glutamate	14A
42	251	28	0	acetylcholine		Dh31, spab	Ubx, abd-A
43	251	53	1				Ubx
44	249	18	1	acetylcholine			Ubx
45	243	45	0	GABA		Nplp1
46	243	19	0	glutamate	16B
47	238	26	0	GABA	1B
48	236	26	0	GABA	13A/19A
49	235	54	3	acetylcholine	8B	spab	abd-A, Abd-B
50	235	25	0	GABA	9A
51	221	81	10		23B	sNPF	Antp
52	220	73	2	glutamate	15B	Proc
53	219	31	0	acetylcholine	8B
54	219	31	2	glutamate	9B	Dh31, sNPF, Nplp1
56	216	27	0	GABA	9A
57	211	18	0	GABA	9A
58	205	19	0	acetylcholine
59	205	51	1	GABA	13A/19A
60	199	29	1	GABA			Antp
61	197	63	1	glutamate		spab, sNPF, AstA, Gpb5	Ubx
62	194	24	1	acetylcholine		Dh31
63	193	3	0	acetylcholine
64	192	46	4	GABA		Tk
65	189	41	2	GABA	13A/19A		abd-A, Abd-B
66	187	33	0		6A
67	187	74	0		23B	spab, sNPF	Antp
68	185	56	7	acetylcholine	10B		Antp
69	183	18	1	glutamate	8A/24B
71	173	22	1
72	172	102	11	Monoaminergic			abd-A
73	165	18	1	GABA	12B		Antp
74	164	29	1	glutamate	14A
75	157	28	1	GABA	13A/19A
76	157	74	6	acetylcholine	8B	spab	abd-A
77	150	30	0	acetylcholine		FMRFa, spab
78	149	25	1	acetylcholine	20A/22A
79	149	44	2	GABA	13A/19A
80	148	181	31	glutamate	15B	Proc
81	148	23	1	GABA	12B
82	142	38	2	GABA	13A/19A
83	141	34	1	GABA	12B
84	139	143	29	Peptidergic		Lk, FMRFa, Capa, Orcokinin, Pdf, Nplp1, Dh31, Gpb5, Proc	abd-A
85	138	39	2	acetylcholine
86	136	30	1	glutamate		Nplp1	Ubx, abd-A
87	136	24	0	GABA	5B/6B		abd-A
88	135	46	1	GABA	0A	Dh31	Ubx
89	135	50	7	GABA	5B/6B		Ubx
90	134	16	0	GABA			Ubx
91	132	18	2		10B
92	126	16	0	acetylcholine
93	118	60	5	acetylcholine	23B	sNPF
94	114	37	2	GABA	12B	CCHa2, AstC, sNPF
95	112	108	9	acetylcholine
96	96	39	7	GABA	13A/19A
97	95	89	1	GABA	5B/6B	AstA, FMRFa, Nplp1
100	89	57	4	acetylcholine	4B	Dh31
101	88	36	3
102	83	56	4	GABA	13A/19A	Nplp1
103	78	60	11	acetylcholine
104	75	76	6	GABA
107	72	27	4	glutamate	21A
108	64	24	2		20A/22A	sNPF
109	63	2	0	GABA			Antp
110	60	30	2	glutamate	8A/24B
111	57	70	13	acetylcholine
112	55	34	2	GABA	0A		abd-A
113	54	99	9	glutamate		Dh31
114	53	115	12	acetylcholine		spab, FMRFa
115	49	25	4
117	40	132	42	acetylcholine	8B
118	22	17	5	glutamate
119	22	49	16	GABA

## Sheet: Non-Neuronal Clusters
Non-Neuronal Cluster	Cell Number	No. Cluster Markers	No. Unique Markers	Cluster Cell Type
18	363	1	0	undefined
23	319	156	3	neuronal/glial mixed
24	318	225	42	glia
55	217	12	2	undefined
70	174	373	69	glia
98	94	475	185	glia
99	91	64	36	salivary gland
105	73	157	92	undefined
106	73	195	33	neuronal/glial
116	40	1390	1357	sperm
