# Supplementary material for: A single-cell transcriptomic atlas of the adult Drosophila ventral nerve cord
Source: eLife. 2020 Apr 21;9:e54074. doi: 10.7554/eLife.54074 (PMC7173974; doi:10.7554/eLife.54074)
Supplement: Figure 2—figure supplement 1—source data 1. — Table showing the average log-fold change (>0.5) values of cluster-discriminative marker genes, including adjusted p-values (<0.05). pct.1 is the proportion of cells that express the gene in the cluster, pct.2 is the proportion of cells that express the gene in all other clusters. [file elife-54074-fig2-figsupp1-data1.xlsx]

## Sheet: Croset et al. markers filtered
cluster	gene	avg_logFC	pct.1	pct.2	p_val_adj
0	CG2269	0.85479	0.976	0.851	4.37737e-126
0	CG32017	0.79471	0.908	0.639	9.00439e-105
0	Nplp1	0.794083	0.585	0.16	6.71431e-81
0	fax	0.567961	0.925	0.795	9.17253e-81
0	bru3	0.570547	0.95	0.779	1.96089e-64
0	IA-2	0.5699	0.999	0.976	4.88401e-64
0	VGlut	1.34177	0.885	0.178	8.10502e-62
0	CG42541	0.571605	0.538	0.378	2.37685e-45
1	Gad1	2.14905	0.977	0.156	8.60139e-184
1	VGAT	0.538542	0.569	0.161	3.96194e-176
1	CG14989	2.33659	0.986	0.334	4.19071e-167
1	slgA	0.685055	0.881	0.591	1.6812e-110
1	CG9674	0.532577	0.682	0.376	7.1973e-96
1	cpx	0.680224	0.986	0.951	9.11683e-87
1	P5CDh1	0.560296	0.762	0.517	1.81358e-86
1	sesB	0.64751	0.988	0.943	2.90189e-79
1	IscU	0.5428	0.817	0.583	5.72438e-75
1	kdn	0.504445	0.692	0.419	8.85907e-70
1	Fie	0.557456	0.736	0.49	5.05513e-69
1	Ald	0.549241	0.919	0.809	1.81477e-60
1	Argk	0.521405	0.958	0.858	1.68746e-49
1	CG32017	0.572323	0.874	0.646	1.33866e-46
1	Scp2	0.515329	0.226	0.179	3.60355e-08
2	heph	1.21812	0.95	0.578	8.41866e-185
2	Hsp67Bc	0.832663	0.638	0.174	2.19244e-94
2	CG14024	0.530476	0.621	0.25	4.26569e-84
2	Ace	0.512061	0.877	0.646	1.00767e-51
2	Ddc	0.557684	0.75	0.421	7.16958e-47
2	CG31221	0.765914	0.948	0.736	3.9285e-45
2	trv	0.50277	0.894	0.682	4.27026e-40
2	jeb	0.539266	0.778	0.563	4.01448e-28
2	spab	0.708118	0.541	0.218	2.14365e-22
3	VGlut	1.68319	0.971	0.203	1.79238e-61
3	slgA	0.567917	0.887	0.6	2.24313e-50
3	Ald	0.508896	0.906	0.814	2.22169e-33
4	CG31221	0.717681	0.967	0.739	9.29988e-31
4	spab	0.51504	0.416	0.234	8.12109e-07
5	28SrRNA-Psi:CR45859	1.63932	0.872	0.325	5.78233e-48
5	28SrRNA-Psi:CR40741	0.551312	0.353	0.019	1.58842e-36
5	28SrRNA-Psi:CR45855	1.12837	0.576	0.135	8.3945e-36
5	CG31221	0.575691	0.886	0.745	3.33162e-30
5	18SrRNA-Psi:CR41602	1.31024	0.83	0.225	7.83546e-28
5	jeb	0.536438	0.739	0.571	2.71307e-16
5	CG43386	0.573327	0.375	0.035	5.91491e-12
6	Msp300	0.640908	0.942	0.728	3.78092e-53
6	pre-rRNA:CR45856	0.508724	0.661	0.382	5.19493e-51
6	mbl	0.690054	0.714	0.521	1.32434e-28
6	CG32017	0.515492	0.791	0.66	2.35036e-21
7	jeb	0.803758	0.787	0.569	7.4542e-46
7	sr	0.835954	0.501	0.249	2.9382e-38
7	CG30497	0.531331	0.665	0.45	2.2253e-30
7	IA-2	0.527189	1	0.977	1.7345e-28
7	spab	0.954274	0.504	0.229	2.74907e-25
7	CG31221	0.670462	0.946	0.741	1.49483e-22
7	CG4577	0.608535	0.501	0.345	1.03715e-20
7	Hsp67Bc	0.522016	0.524	0.194	5.6262e-18
7	Hsp23	0.588246	0.613	0.291	4.78887e-15
7	Hsp26	0.554514	0.805	0.428	1.42212e-09
8	mCherry	2.40676	0.848	0.008	0
8	crb	0.583325	0.445	0.017	3.96581e-268
8	qm	0.87938	0.825	0.218	9.36614e-181
8	bru2	0.557946	0.437	0.021	3.37786e-142
8	CG5830	1.37717	0.923	0.441	6.84397e-140
8	CG11191	0.539278	0.551	0.09	6.28681e-137
8	Pka-R2	1.34725	0.99	0.621	5.86748e-128
8	Mef2	0.901751	0.819	0.245	1.53462e-120
8	mub	1.20083	0.998	0.772	2.56924e-104
8	Pka-C1	0.983932	0.994	0.757	1.29745e-89
8	Eip93F	1.24418	0.925	0.276	1.34644e-76
8	CG3625	0.568501	0.753	0.341	3.23712e-69
8	Appl	0.647651	1	0.96	7.48802e-69
8	slo	0.584382	0.929	0.74	8.52315e-59
8	Sytalpha	0.541728	0.651	0.195	1.10074e-57
8	ey	0.662858	0.586	0.064	1.10282e-57
8	Rdl	0.57705	0.996	0.922	1.23093e-50
8	dysc	0.56597	0.944	0.76	1.80286e-45
8	Rgk1	0.581419	0.655	0.163	2.56488e-45
8	Dop1R2	0.534365	0.547	0.106	3.40497e-45
8	Pkc53E	0.650239	0.867	0.475	6.50278e-45
8	dac	0.682236	0.678	0.116	2.11447e-40
8	Octbeta1R	0.573712	0.628	0.166	8.4189e-38
8	CG13739	0.561922	0.701	0.27	5.18905e-32
8	Fas2	0.564371	0.73	0.265	1.91592e-31
8	CG45263	0.537594	0.815	0.458	3.07035e-31
8	toy	0.551997	0.738	0.249	4.08511e-25
8	jdp	0.560953	1	0.761	1.22981e-16
8	sNPF	0.657082	0.79	0.178	6.40384e-05
9	sesB	0.993664	0.987	0.946	8.06219e-90
9	CG15628	0.7882	0.843	0.613	2.88996e-76
9	ATPsynC	0.798484	0.961	0.877	1.55575e-75
9	COX4	0.792882	0.848	0.662	2.02619e-73
9	blw	0.797561	0.955	0.851	3.89493e-70
9	Fie	0.807439	0.803	0.5	2.27075e-68
9	MESK2	0.70631	0.863	0.722	6.68241e-66
9	Argk	0.825234	0.942	0.864	6.42503e-61
9	CG7630	0.699446	0.824	0.644	2.07259e-60
9	levy	0.728528	0.815	0.64	2.53996e-60
9	cype	0.72748	0.824	0.679	6.07907e-60
9	ND-MLRQ	0.677011	0.815	0.651	2.88472e-59
9	ATPsynB	0.677343	0.768	0.552	8.11971e-59
9	sun	0.667742	0.719	0.535	2.55409e-58
9	ATPsynCF6	0.66933	0.773	0.593	7.34642e-58
9	ATPsynbeta	0.771813	0.916	0.786	7.71254e-58
9	COX7A	0.690248	0.773	0.597	1.02282e-57
9	ATPsynO	0.66983	0.753	0.518	2.12781e-57
9	betaTub56D	0.844226	0.779	0.532	3.48995e-57
9	UQCR-C1	0.618894	0.723	0.479	4.35023e-57
9	COX6B	0.683943	0.843	0.722	6.08685e-57
9	COX5A	0.711396	0.809	0.587	1.38857e-56
9	ATPsynD	0.677413	0.766	0.605	9.73875e-55
9	ATPsynF	0.636187	0.779	0.6	2.02838e-54
9	UQCR-Q	0.628271	0.747	0.543	3.48604e-54
9	tipE	0.501197	0.586	0.303	4.2034e-54
9	ATPsyngamma	0.645672	0.715	0.483	8.22285e-54
9	Mpcp2	0.626407	0.822	0.675	2.21575e-53
9	nrv3	0.569274	1	0.984	3.38194e-53
9	ATPsynG	0.653803	0.815	0.642	3.48929e-52
9	ND-49	0.591313	0.672	0.417	4.09286e-52
9	ND-B17.2	0.604438	0.676	0.417	6.81866e-52
9	COX7C	0.649055	0.719	0.536	1.33904e-51
9	COX5B	0.625578	0.788	0.594	7.90278e-51
9	ND-39	0.549373	0.612	0.387	2.02615e-50
9	Fas1	0.513449	0.936	0.841	2.37741e-50
9	Cyt-c1	0.637746	0.73	0.506	3.73211e-50
9	Cyt-c-p	0.682254	0.852	0.746	1.29719e-49
9	CG7215	0.622155	0.762	0.559	4.51759e-49
9	UQCR-14	0.635256	0.693	0.489	1.31489e-48
9	Scsalpha	0.52713	0.605	0.393	1.70588e-47
9	Neb-cGP	0.591608	0.704	0.484	7.3369e-47
9	alphaTub84B	0.651647	0.839	0.648	8.53976e-47
9	Acon	0.526404	0.622	0.364	1.39553e-46
9	RFeSP	0.591025	0.742	0.542	5.08627e-46
9	Hs3st-A	0.65631	0.848	0.538	2.67662e-45
9	Gdh	0.525486	0.659	0.469	7.04291e-44
9	ND-13A	0.501068	0.584	0.371	8.15433e-44
9	futsch	0.605887	0.976	0.904	1.16652e-43
9	roh	0.564258	0.717	0.534	2.02522e-43
9	UQCR-6.4	0.537243	0.665	0.475	3.64385e-43
9	Gapdh1	0.560897	0.62	0.39	6.54783e-43
9	COX8	0.602269	0.779	0.607	8.36475e-43
9	Hsp60A	0.537413	0.704	0.448	1.37115e-42
9	l(1)G0156	0.532603	0.618	0.387	9.38388e-41
9	ND-MWFE	0.511036	0.622	0.39	3.29991e-40
9	Hk	0.502117	0.798	0.665	1.14967e-39
9	CG6329	0.5302	0.974	0.934	1.16992e-39
9	ATPsynE	0.523012	0.706	0.507	1.47036e-39
9	VAChT	0.706227	0.869	0.577	6.98048e-39
9	ND-ACP	0.513323	0.616	0.387	2.17502e-38
9	CG31345	0.630319	0.341	0.089	2.49443e-38
9	IscU	0.573146	0.794	0.596	1.86034e-37
9	UQCR-11	0.529593	0.74	0.573	2.1152e-37
9	CG14509	0.621517	0.7	0.569	5.40371e-37
9	Ace	0.543707	0.835	0.657	7.5217e-34
9	porin	0.554641	0.886	0.783	5.63442e-33
9	CG10527	0.677218	0.303	0.08	3.05825e-29
9	cpx	0.578411	0.985	0.953	6.04812e-27
9	mbl	0.60106	0.691	0.524	8.93615e-25
9	Cbp53E	0.620167	0.659	0.574	2.45486e-15
10	CG13055	1.0643	0.665	0.032	0
10	Pka-C1	1.71101	1	0.758	3.44689e-287
10	prt	0.958203	0.73	0.041	1.83725e-278
10	Pka-R2	1.86643	1	0.623	6.73266e-257
10	GstD11	0.743144	0.586	0.003	9.34842e-235
10	CG32204	1.39886	0.92	0.164	1.97992e-216
10	mub	1.66567	1	0.773	1.30756e-196
10	CG5830	1.63991	0.981	0.442	7.42307e-189
10	rut	0.788609	0.699	0.198	2.38298e-150
10	cora	0.847767	0.771	0.242	7.81007e-147
10	Rgk1	1.02406	0.822	0.16	7.35883e-141
10	Dif	0.515165	0.499	0.046	2.34546e-132
10	CG17816	0.99561	0.964	0.635	5.41471e-127
10	Mef2	0.952981	0.817	0.249	1.5052e-117
10	Pkc53E	1.06971	0.959	0.474	2.47968e-116
10	Pka-R1	1.03999	0.983	0.575	6.46023e-115
10	ab	0.950844	0.822	0.189	4.04523e-111
10	jdp	1.39198	1	0.763	2.6999e-102
10	dysc	0.86197	0.976	0.76	4.54603e-98
10	dnc	0.755208	0.947	0.737	1.22899e-84
10	Dop1R1	0.838543	0.795	0.24	1.81608e-78
10	CG3625	0.640387	0.737	0.344	1.80417e-76
10	14-3-3zeta	0.744246	0.995	0.984	1.53278e-72
10	CG32647	0.711362	0.766	0.344	6.23697e-70
10	CG32700	1.03866	0.949	0.403	7.76169e-69
10	kuz	0.564501	0.692	0.321	1.59856e-67
10	gish	0.622503	0.896	0.609	1.40019e-66
10	Dop1R2	0.671731	0.634	0.105	4.64303e-65
10	sdt	0.575987	0.742	0.393	3.26146e-63
10	HDAC4	0.556961	0.79	0.43	4.94301e-62
10	Rbp	0.592096	0.846	0.579	7.44085e-61
10	ey	0.729036	0.627	0.066	1.07933e-58
10	Sytalpha	0.586895	0.667	0.197	4.80309e-57
10	mamo	1.34845	0.978	0.406	1.784e-52
10	dlg1	0.585556	0.896	0.63	9.59127e-52
10	Cngl	0.70751	0.894	0.54	3.70834e-47
10	Bx	0.765099	0.778	0.226	1.08821e-45
10	eEF1alpha2	0.577867	0.971	0.834	6.93505e-45
10	CG42402	0.556587	0.694	0.296	1.05581e-43
10	Imp	0.833882	0.79	0.213	3.4364e-42
10	Gfrl	0.680327	0.867	0.417	3.63161e-42
10	cpo	0.579975	0.916	0.672	8.90986e-40
10	toy	0.718444	0.778	0.251	9.86906e-39
10	slo	0.508071	0.925	0.741	3.41854e-38
10	Nlg3	0.51208	0.754	0.403	6.85139e-37
10	Pde1c	0.576765	0.8	0.429	1.05563e-36
10	fru	0.740681	0.771	0.233	9.6267e-34
10	sNPF	1.56639	0.973	0.174	6.0505e-33
10	dac	0.663895	0.629	0.122	9.49673e-33
10	Pka-C3	0.70583	0.622	0.054	2.92574e-31
10	Octbeta1R	0.559743	0.636	0.169	5.60017e-31
10	rad	0.603613	0.855	0.432	1.62765e-28
10	cpx	0.566212	1	0.952	7.02997e-26
10	Msp300	0.524808	0.933	0.731	1.16318e-25
10	Hr38	0.59099	0.448	0.143	4.5731e-25
11	Sp1	0.592554	0.274	0.014	6.23715e-17
11	Hsp70Bc	0.536028	0.504	0.234	1.12292e-13
11	pros	0.633972	0.968	0.866	2.61751e-13
11	Hsp26	0.711412	0.732	0.439	6.79396e-12
11	Hsp27	0.541905	0.49	0.259	2.04947e-08
11	Hsp68	0.541068	0.466	0.232	1.34603e-07
12	ct	0.522268	0.53	0.149	9.44104e-12
12	CG2016	0.78617	0.144	0.01	1.14369e-08
13	ChAT	0.64139	0.756	0.339	1.76019e-28
13	CG14762	0.559467	0.734	0.413	1.81867e-28
13	Cyp1	0.577468	0.931	0.753	4.74234e-26
13	VAChT	0.666958	0.944	0.579	6.97155e-24
13	CG31221	0.860679	0.912	0.748	1.71657e-22
13	Cbp53E	0.85951	0.794	0.571	4.72467e-21
13	sesB	0.641931	0.984	0.946	1.24536e-20
13	Hsp67Ba	0.557423	0.628	0.247	7.17415e-19
13	7B2	0.502691	0.922	0.775	2.51447e-17
13	jeb	0.664345	0.834	0.573	6.38756e-17
13	hth	0.523331	0.688	0.495	3.75919e-14
13	Imp	0.514937	0.653	0.223	2.89844e-13
13	Argk	0.508935	0.966	0.864	1.26289e-11
13	spab	0.866358	0.569	0.234	1.57563e-10
14	vg	0.767422	0.536	0.028	1.48896e-28
14	CG32017	0.8105	0.964	0.661	2.47269e-20
14	CG14989	1.65552	0.991	0.384	2.12855e-13
14	Gad1	1.32227	0.96	0.219	1.10666e-07
14	Nplp1	0.546089	0.496	0.199	0.000208219
15	MRE16	2.10462	0.935	0.745	9.4125e-123
15	noe	1.08855	0.985	1	3.52902e-73
15	CR40469	1.90148	0.602	0.319	2.25653e-57
15	CG12239	3.16923	0.214	0.072	1.22681e-56
15	RpL39	0.995471	0.756	0.612	1.54888e-56
15	RpS20	0.89485	0.692	0.507	1.00817e-55
15	RpL36	1.01322	0.831	0.706	1.13504e-55
15	RpS26	0.900899	0.741	0.588	3.52416e-55
15	RpL41	1.06746	0.811	0.649	3.54963e-54
15	RpS29	0.942708	0.796	0.66	1.25041e-51
15	RpL29	0.901431	0.741	0.618	1.11791e-46
15	RpS25	0.815924	0.811	0.704	1.82719e-45
15	RpLP1	0.732447	0.662	0.444	1.64679e-42
15	RpS28b	0.834956	0.687	0.617	4.22218e-42
15	RpS14a	0.799498	0.692	0.552	4.17615e-41
15	RpL35	0.7881	0.711	0.54	4.75524e-41
15	Ufd4	2.00145	0.119	0.134	1.07419e-39
15	Ilp5	2.22358	0.134	0.027	2.74095e-39
15	RpL27A	0.724179	0.751	0.532	6.33336e-37
15	RpL24	0.794041	0.736	0.634	1.16624e-36
15	RpS17	0.731056	0.662	0.549	1.03336e-34
15	Tctp	0.598895	0.498	0.263	1.00503e-33
15	RpL32	0.68161	0.701	0.477	1.20132e-33
15	bbc	0.659156	0.473	0.269	8.64417e-33
15	RpL37a	0.733564	0.746	0.632	2.45474e-32
15	RpS8	0.72822	0.766	0.625	3.66566e-31
15	RpL23	0.724577	0.697	0.576	1.01002e-30
15	RpL17	0.682058	0.662	0.438	1.19542e-30
15	RpL14	0.696389	0.761	0.63	1.50429e-30
15	RpS30	0.671262	0.721	0.603	2.40788e-29
15	RpL26	0.648109	0.677	0.473	1.25484e-28
15	RpLP2	0.610923	0.602	0.396	5.02262e-28
15	RpL37A	0.673739	0.726	0.546	2.04925e-27
15	RpL6	0.599957	0.697	0.538	2.22871e-27
15	RpL40	0.663998	0.746	0.611	2.56456e-27
15	sta	0.549737	0.632	0.41	3.26343e-26
15	RpS18	0.65182	0.667	0.519	3.77157e-26
15	CG42394	0.63008	0.184	0.068	5.87629e-26
15	RpL36A	0.629885	0.607	0.49	1.44867e-25
15	RpS24	0.581379	0.662	0.494	1.62626e-25
15	RpS11	0.63269	0.692	0.57	3.97496e-25
15	RpL5	0.683706	0.801	0.686	4.19071e-25
15	RpS13	0.614117	0.647	0.469	8.15928e-24
15	eEF1alpha1	0.532071	0.433	0.199	2.3921e-23
15	RpL10	0.647507	0.731	0.586	4.18711e-23
15	RpS23	0.627943	0.682	0.511	5.06162e-23
15	RpS27	0.57352	0.672	0.58	5.06175e-23
15	RpS15Aa	0.575893	0.632	0.452	6.91586e-23
15	RpS4	0.589854	0.662	0.524	1.66132e-22
15	RpS27A	0.655721	0.721	0.569	2.77689e-22
15	RpL18A	0.558185	0.617	0.502	2.92588e-22
15	RpS9	0.581741	0.677	0.519	5.74604e-22
15	RpS15	0.593731	0.716	0.541	5.96159e-22
15	RpL15	0.684671	0.796	0.707	6.18877e-22
15	RpS3	0.560283	0.652	0.503	1.55842e-21
15	RpL31	0.620326	0.706	0.655	3.45409e-21
15	wnd	0.570675	0.1	0.14	3.86658e-21
15	ITP	0.919767	0.164	0.055	4.86966e-21
15	RpL23A	0.514075	0.597	0.438	1.57163e-20
15	RpL21	0.609464	0.791	0.675	1.89241e-20
15	RpL9	0.593843	0.647	0.491	3.53567e-20
15	RpL12	0.572543	0.632	0.495	8e-20
15	RpL13A	0.522324	0.617	0.471	8.00748e-20
15	RpS21	0.508845	0.502	0.366	8.70239e-20
15	RpL28	0.540493	0.746	0.593	1.46335e-19
15	Gs2	2.16044	0.662	0.088	2.0976e-18
15	RpS12	0.557507	0.711	0.565	2.51764e-18
15	RpS6	0.593299	0.806	0.702	7.77037e-18
15	RpL38	0.583368	0.711	0.651	1.54696e-17
15	Pif1A	0.516041	0.368	0.129	4.05794e-17
15	Ilp3	0.806037	0.114	0.02	3.10863e-11
15	CG7607	1.05402	0.493	0.035	1.93115e-10
15	Tsp5D	1.00418	0.463	0.037	2.03494e-09
15	nrv2	0.92913	0.642	0.131	8.79621e-08
15	Adh	1.23701	0.751	0.134	1.20918e-07
15	CG4577	0.829338	0.308	0.354	1.6349e-07
15	Ms	2.05574	0.159	0.053	7.43085e-07
15	Dh44	1.41593	0.09	0.113	2.30609e-06
15	CG31705	0.502055	0.398	0.057	3.23385e-05
15	CG8369	1.20095	0.632	0.088	0.000106999
15	Msr-110	0.759822	0.527	0.043	0.000140478
15	vir-1	0.691691	0.408	0.042	0.000326871
15	CAH1	0.58429	0.393	0.034	0.000338106
15	CG14141	0.567315	0.423	0.029	0.000817684
15	CG1552	0.983986	0.527	0.044	0.00384083
15	Inx2	0.561815	0.413	0.041	0.00803538
16	aop	0.581444	0.497	0.124	2.50214e-29
16	Ca-alpha1T	0.938201	0.663	0.535	2.84598e-23
16	Pka-R1	0.661226	0.925	0.585	5.44427e-17
16	Pkc53E	0.696504	0.775	0.488	5.87175e-17
16	CG43902	1.04109	0.765	0.295	7.15633e-17
16	CG31760	0.537894	0.38	0.349	2.10448e-14
16	CG34155	0.974568	0.385	0.137	3.6818e-14
16	Lim1	0.796641	0.754	0.186	5.6556e-13
16	CG15236	0.562649	0.684	0.356	3.21233e-09
16	Ets65A	0.817413	0.615	0.051	4.62067e-09
16	Ddc	0.515633	0.69	0.444	9.86177e-08
16	Wnt4	0.773145	0.267	0.045	5.524e-06
16	heph	0.536003	0.813	0.605	0.00012405
16	NPF	0.75693	0.15	0.012	0.0135873
17	CG13330	0.895419	0.558	0.002	2.14225e-166
17	JhI-21	0.640298	0.474	0.01	2.43425e-75
17	DAT	2.31332	0.724	0.024	3.6808e-67
17	Vmat	4.2584	1	0.067	8.97817e-53
17	Tbh	1.37855	0.16	0.092	1.6603e-36
17	Dhpr	0.584456	0.487	0.158	5.23401e-34
17	CG2269	1.1449	0.981	0.862	7.00434e-34
17	ple	2.6788	0.654	0.015	1.06996e-33
17	Appl	0.653676	1	0.961	4.14841e-21
17	Ddc	0.854497	0.699	0.444	5.45532e-21
17	CG12531	0.553611	0.506	0.406	1.09323e-19
17	Pal2	0.685853	0.801	0.592	1.20983e-18
17	Fer2	0.561429	0.365	0.019	1.18076e-16
17	shep	0.515741	1	0.943	2.12922e-11
17	Tdc2	0.878344	0.186	0.007	7.8619e-11
17	kek1	0.554169	0.686	0.471	6.24836e-10
17	hig	0.739748	0.506	0.5	9.17882e-10
17	cpx	0.57463	1	0.954	3.25211e-08
17	CG43729	0.516475	0.641	0.486	6.74543e-07
17	CG17193	0.591068	0.365	0.083	7.2698e-07
17	Pvf3	0.621982	0.66	0.376	1.67193e-06
17	scro	0.551106	0.391	0.056	2.01359e-06
17	CG4577	0.814293	0.513	0.351	2.54779e-06
17	mbl	0.623054	0.769	0.528	5.50304e-06
17	Dop2R	0.516772	0.859	0.644	7.70482e-05
18	trio	1.27529	0.912	0.36	1.16138e-92
18	Pka-C1	1.62786	1	0.765	2.78854e-74
18	Dyb	0.89588	0.824	0.321	7.68785e-58
18	CG18812	0.927103	0.953	0.552	2.98683e-52
18	CG13739	1.37888	0.959	0.281	3.02067e-52
18	CG8641	1.79422	0.966	0.126	1.13979e-49
18	mub	1.49943	1	0.779	3.21107e-49
18	jdp	1.63809	1	0.769	4.65748e-48
18	RhoGDI	0.71248	0.75	0.268	2.61725e-46
18	dlg1	0.923938	0.926	0.636	6.55079e-46
18	mamo	2.15659	1	0.42	1.79217e-45
18	CG42788	0.657029	0.689	0.202	1.74743e-40
18	CG31191	0.953566	0.791	0.151	3.49394e-40
18	14-3-3zeta	0.917699	1	0.984	2.13059e-39
18	Mical	0.546471	0.5	0.088	1.16167e-38
18	nAChRalpha6	1.06772	0.98	0.66	5.35492e-37
18	Pkc98E	0.753059	0.959	0.677	6.3697e-36
18	metro	0.580538	0.662	0.262	1.04007e-34
18	CG1513	0.725126	0.736	0.33	1.15194e-34
18	fok	0.894139	0.865	0.405	1.94278e-34
18	CG42322	0.648135	0.669	0.359	9.70798e-34
18	dysc	0.868765	0.98	0.765	3.94224e-33
18	CG30158	0.689601	0.595	0.107	1.72059e-31
18	CG7646	0.707961	0.919	0.676	1.77013e-31
18	CG42613	0.917541	0.932	0.605	4.20261e-30
18	Ndae1	0.540953	0.635	0.225	7.19884e-25
18	dnc	0.746518	0.946	0.743	1.14397e-24
18	pum	0.691312	0.926	0.727	3.48389e-24
18	Dop1R2	0.828604	0.696	0.118	1.98535e-23
18	Appl	0.710661	1	0.961	3.22325e-23
18	cmpy	0.658726	0.791	0.317	1.70931e-21
18	cora	0.625665	0.669	0.257	1.97273e-21
18	cac	0.641252	0.885	0.69	3.71371e-21
18	oaf	0.526345	0.561	0.184	6.88731e-18
18	CG9813	0.551564	0.811	0.461	1.12163e-17
18	dpr8	0.681457	0.865	0.49	1.25775e-17
18	Slob	0.559206	0.608	0.258	5.68636e-17
18	l(1)G0469	0.574609	0.581	0.151	6.21272e-17
18	CG10077	0.541122	0.973	0.846	1.60479e-16
18	Hs3st-A	0.723961	0.966	0.546	3.48918e-16
18	Tomosyn	0.607157	0.919	0.666	7.5453e-16
18	Pka-R2	0.894034	0.986	0.633	1.77554e-15
18	rut	0.506903	0.574	0.213	2.25262e-15
18	CG34370	0.541048	0.601	0.23	3.05545e-15
18	Cngl	0.707477	0.885	0.55	3.07668e-15
18	Rgk3	0.525285	0.561	0.131	9.53881e-15
18	eEF1alpha2	0.573471	0.993	0.837	1.46923e-14
18	Gbeta13F	0.557255	0.966	0.874	4.80672e-14
18	Bsg	0.574385	0.939	0.751	8.34194e-14
18	CG31997	0.72542	0.682	0.131	3.16411e-13
18	ey	0.738188	0.676	0.08	9.17552e-13
18	Dop1R1	0.62672	0.736	0.255	2.12781e-12
18	Gfrl	0.68208	0.845	0.429	2.27871e-12
18	Rgk1	0.607096	0.73	0.178	7.92778e-12
18	olf413	0.581646	0.818	0.444	1.91271e-11
18	CG42313	0.517172	0.689	0.319	1.15159e-10
18	igl	0.668086	0.939	0.715	3.86319e-10
18	toy	0.670091	0.777	0.265	1.58571e-09
18	Pka-C3	0.851553	0.736	0.067	1.79882e-09
18	Mp	0.548393	0.791	0.353	3.77596e-09
18	dac	0.632923	0.682	0.135	3.61928e-08
18	Pde1c	0.509524	0.804	0.439	1.04586e-07
19	Ugt35b	2.16219	0.986	0.021	0
19	CG9657	1.41969	0.878	0.014	0
19	zyd	1.2669	0.837	0.01	0
19	Idgf3	0.945564	0.701	0.008	4.23366e-280
19	Spn43Ab	1.2532	0.769	0.013	4.48671e-265
19	CG5895	0.905027	0.66	0.007	3.00747e-264
19	CG5404	1.02467	0.687	0.007	4.17774e-259
19	CG16743	1.86123	0.789	0.011	4.25195e-250
19	CG9507	1.13807	0.667	0.007	2.16497e-240
19	CG31663	1.47837	0.823	0.015	6.74459e-224
19	CG10513	1.42166	0.714	0.011	1.24612e-220
19	euc	1.41644	0.83	0.018	6.8527e-217
19	axo	1.70186	0.878	0.025	1.71502e-215
19	Picot	0.945019	0.68	0.015	3.27687e-210
19	CDase	0.819994	0.585	0.006	1.66599e-209
19	Inx3	0.805669	0.612	0.007	5.86124e-199
19	List	0.804035	0.571	0.004	6.65559e-184
19	CG31676	1.00527	0.633	0.012	9.26275e-174
19	Csas	0.8068	0.619	0.011	3.74288e-163
19	Dbi	0.675129	0.503	0.007	5.21475e-162
19	Oatp58Dc	0.659267	0.49	0.005	4.12135e-149
19	CG10514	0.972277	0.469	0.005	1.72427e-141
19	CG31248	1.1616	0.639	0.018	1.47943e-140
19	DNaseII	0.59701	0.456	0.003	1.94249e-140
19	ClC-a	0.620732	0.469	0.005	3.30684e-140
19	CG7084	1.06327	0.667	0.014	1.97482e-138
19	Mal-A5	0.558099	0.469	0.004	3.6686e-136
19	CG42235	0.534764	0.449	0.004	8.21534e-135
19	CG6723	0.831932	0.633	0.011	4.27179e-132
19	Irk2	0.866223	0.721	0.015	2.22708e-130
19	Tsf1	1.93741	0.769	0.023	2.17115e-129
19	CG6287	0.663546	0.524	0.01	1.28515e-127
19	CG12177	0.843338	0.585	0.029	6.09895e-126
19	CG15201	1.56771	0.769	0.022	1.44171e-125
19	CG11889	0.576802	0.415	0.005	4.04675e-123
19	CG3940	1.96967	0.925	0.031	8.38856e-119
19	CG31869	0.687247	0.408	0.005	3.98895e-115
19	N	0.639026	0.463	0.011	5.2113e-108
19	MRE16	2.37016	0.993	0.745	6.59911e-108
19	CG6218	0.783075	0.612	0.056	4.02182e-106
19	CG42613	1.64274	0.959	0.605	3.98653e-105
19	hoe1	1.36985	0.803	0.054	4.16829e-100
19	bnb	1.48164	0.857	0.025	7.76381e-99
19	GstD9	0.649411	0.429	0.007	5.05592e-97
19	Timp	0.707741	0.524	0.009	6.80622e-94
19	CG9689	0.612415	0.32	0.003	1.54456e-91
19	ced-6	0.870287	0.653	0.011	2.44854e-89
19	trol	1.9989	0.905	0.034	3.87617e-88
19	wdp	0.590798	0.32	0.002	5.66735e-88
19	CG5758	1.56224	0.986	0.389	1.54253e-87
19	CG10863	0.644969	0.585	0.054	1.98637e-85
19	CG31974	0.756933	0.592	0.01	7.06419e-84
19	Aldh	0.631779	0.558	0.012	7.82327e-82
19	Gel	0.552342	0.456	0.031	1.31276e-77
19	nrv2	2.8637	1	0.129	1.38157e-77
19	CG6356	0.546005	0.313	0.008	1.60264e-71
19	CG4829	1.24278	0.803	0.031	4.9332e-70
19	mgl	1.05755	0.803	0.147	1.81118e-69
19	Pcyt2	0.867093	0.585	0.014	6.78433e-69
19	CG30197	1.78778	0.735	0.022	6.39446e-68
19	Got1	0.748576	0.68	0.064	9.47116e-67
19	Hydr1	0.546661	0.401	0.021	2.17346e-66
19	CG2852	1.08745	0.884	0.393	7.73364e-65
19	Sod3	1.86565	0.925	0.029	1.44382e-63
19	dally	1.43562	0.803	0.219	1.45539e-62
19	Adh	3.22117	1	0.134	7.30385e-61
19	vkg	1.01299	0.694	0.009	3.47082e-60
19	apolpp	1.61164	0.66	0.049	5.19821e-59
19	RpL22	0.890264	0.776	0.201	6.07898e-59
19	CG31706	1.54548	0.755	0.024	1.85506e-56
19	Cyp28d1	0.831645	0.571	0.015	1.95937e-55
19	CG9686	1.87444	0.558	0.022	2.52992e-55
19	CG6357	1.46442	0.776	0.029	4.83098e-55
19	Treh	0.849	0.694	0.057	1.71603e-53
19	Invadolysin	0.961649	0.646	0.113	8.11563e-53
19	CG8369	3.27283	0.993	0.086	1.89723e-51
19	CG5273	0.776392	0.707	0.189	4.44459e-51
19	myo	0.832796	0.612	0.041	7.93245e-51
19	nuf	0.670878	0.578	0.112	1.39036e-47
19	Past1	0.593444	0.442	0.091	6.38067e-47
19	Npc2a	0.994329	0.673	0.034	3.04079e-44
19	mnd	1.20412	0.707	0.032	3.28949e-44
19	CG32521	0.941629	0.605	0.109	8.47514e-44
19	CG12730	0.572898	0.469	0.033	9.12312e-44
19	Cyp4g15	0.744736	0.476	0.011	1.26325e-41
19	Obp44a	1.42008	0.544	0.025	1.02244e-40
19	Mdh1	0.698729	0.721	0.164	2.21641e-39
19	GlcAT-P	0.868257	0.803	0.309	2.77221e-39
19	GstE12	0.746106	0.558	0.017	3.81959e-39
19	Cyp9f2	0.606165	0.51	0.01	5.35449e-39
19	CG14945	1.6469	0.864	0.021	1.4343e-38
19	CG11892	0.812535	0.17	0.002	6.23855e-38
19	CR40469	1.92699	0.619	0.321	9.44482e-38
19	CR45018	0.546578	0.374	0.012	4.41149e-37
19	CG9377	1.2954	0.313	0.007	2.46043e-36
19	CG10433	1.30077	0.837	0.033	3.491e-34
19	mfas	1.19934	0.816	0.023	1.31264e-32
19	MtnA	1.3703	0.735	0.032	1.27759e-31
19	eEF1alpha1	0.744387	0.714	0.196	1.45284e-31
19	Pdk	0.657929	0.592	0.07	1.59088e-31
19	Tsp42Ee	0.574308	0.51	0.145	3.70586e-31
19	GstE2	0.991272	0.707	0.021	9.10608e-31
19	Col4a1	1.599	0.837	0.019	9.314e-31
19	CG6770	0.935405	0.918	0.721	1.1454e-29
19	Gabat	0.896012	0.878	0.429	7.94806e-28
19	CG17508	0.522338	0.49	0.167	8.22654e-28
19	uzip	0.630577	0.619	0.245	2.22869e-27
19	gem	1.39411	0.871	0.076	3.34996e-27
19	CG7888	1.3157	0.81	0.017	4.93923e-27
19	bdl	0.908238	0.707	0.02	6.80997e-27
19	Amph	0.679402	0.66	0.164	3.55474e-26
19	GstD1	1.08392	0.796	0.053	4.74792e-26
19	Sirup	0.742552	0.605	0.143	2.01004e-25
19	CG4409	1.21768	0.762	0.019	3.72079e-24
19	vir-1	1.62424	0.878	0.037	6.50928e-23
19	CG14688	0.745818	0.578	0.014	2.73988e-22
19	GstE1	0.506756	0.429	0.01	6.5168e-22
19	SPARC	1.38228	0.782	0.016	8.20205e-21
19	Msr-110	1.80816	0.952	0.04	8.52758e-21
19	spir	0.525197	0.639	0.294	1.95161e-20
19	mlt	0.646326	0.646	0.381	2.99725e-20
19	CAH1	1.37901	0.776	0.03	1.45883e-19
19	Pif1A	0.662075	0.653	0.126	4.75226e-18
19	tal-AA	0.944131	0.687	0.017	1.4768e-17
19	Inx2	1.59537	0.925	0.035	1.78089e-17
19	CG17841	0.513414	0.673	0.315	2.27136e-16
19	CG14141	1.38904	0.803	0.026	5.34057e-16
19	rho	0.952699	0.497	0.089	7.5425e-16
19	CG1545	0.826895	0.694	0.017	1.73594e-15
19	ninaB	0.572378	0.361	0.01	1.91692e-14
19	ogre	1.16109	0.837	0.029	2.09497e-14
19	LpR2	0.55568	0.442	0.2	5.22216e-14
19	CAP	0.654532	0.524	0.055	1.11008e-13
19	Lsd-2	0.536726	0.395	0.016	1.45039e-13
19	bbc	0.533621	0.585	0.268	1.75277e-12
19	Adgf-D	0.570437	0.483	0.015	1.27592e-10
19	RpL41	0.592402	0.878	0.649	2.10593e-10
19	CG31705	0.914859	0.762	0.053	2.37322e-10
19	aay	0.949704	0.673	0.022	3.00552e-10
19	CG7607	1.22064	0.592	0.036	3.04868e-10
19	CG1552	1.8818	0.932	0.041	3.67413e-10
19	CG13631	0.780933	0.531	0.02	5.76093e-10
19	Gapdh1	0.511447	0.714	0.396	6.41544e-10
19	Rh50	0.966678	0.619	0.021	1.75456e-09
19	CG15209	1.55109	0.673	0.034	3.8537e-09
19	Cyp1	0.518643	0.925	0.756	9.43656e-09
19	Tsp5D	1.21905	0.837	0.033	3.74877e-08
19	Gs2	1.85396	0.952	0.087	1.11729e-07
19	AnxB9	0.527351	0.449	0.019	1.51997e-06
19	Ufd4	0.580403	0.102	0.134	4.27217e-06
19	CG10527	0.508184	0.537	0.084	0.000851625
19	CG9394	1.28067	0.755	0.038	0.00499054
20	Sox21a	0.700983	0.548	0.009	1.10748e-35
20	fz2	0.731259	0.696	0.382	8.45105e-14
20	CG6123	0.776355	0.678	0.322	1.28938e-09
20	Lim1	0.818937	0.817	0.189	5.77205e-08
20	twz	0.575058	0.322	0.086	0.00017173
20	sNPF	1.42051	0.47	0.204	0.000215341
20	toy	0.545783	0.783	0.266	0.000722457
20	CG31221	0.699485	1	0.75	0.00786115
20	hig	0.521532	0.652	0.498	0.00947251
21	CG43729	1.50186	0.833	0.484	1.90382e-46
21	norpA	1.06204	0.88	0.685	3.55684e-30
21	Ih	0.992918	0.907	0.711	7.66106e-29
21	cpo	1.01447	0.935	0.679	8.5011e-29
21	Eaat2	0.691678	0.593	0.245	3.88281e-27
21	CG7708	0.846091	0.704	0.259	1.96308e-22
21	CG3257	0.560594	0.417	0.223	9.46814e-21
21	AcCoAS	0.539444	0.565	0.207	5.43609e-20
21	ChAT	0.98263	0.778	0.348	8.74365e-20
21	Atpalpha	0.708199	1	0.999	7.2434e-19
21	Ace	0.904896	0.963	0.662	1.04758e-18
21	rgn	1.20417	0.704	0.427	2.35973e-18
21	CG7990	0.602659	0.685	0.324	2.37308e-18
21	hth	1.10466	0.898	0.497	7.17608e-18
21	Mob2	0.671214	0.694	0.393	5.15438e-17
21	MESK2	0.732803	0.889	0.727	2.25225e-16
21	VAChT	1.03623	0.972	0.587	2.96481e-16
21	nrv3	0.714198	1	0.985	3.85558e-16
21	igl	0.98559	0.907	0.716	5.10202e-16
21	nmo	0.669673	0.769	0.541	6.5753e-16
21	Rbp9	0.775902	0.944	0.759	8.39945e-16
21	sesB	0.801651	0.981	0.947	1.62753e-15
21	CG1090	0.55044	0.657	0.35	3.24121e-15
21	ST6Gal	0.828427	0.463	0.032	6.38822e-15
21	ATPsynC	0.743521	0.944	0.88	8.57232e-15
21	RhoGAP19D	0.548621	0.639	0.336	9.92885e-15
21	blw	0.7322	0.917	0.855	4.01682e-14
21	CG6044	0.663492	0.741	0.434	4.95292e-14
21	Baldspot	0.536211	0.648	0.379	1.43791e-13
21	Fas1	0.602716	0.954	0.844	2.02621e-13
21	nolo	0.801484	0.62	0.291	2.62238e-13
21	cpx	0.817756	0.991	0.954	5.73532e-13
21	SP2353	0.557569	0.722	0.329	1.81902e-12
21	Mdh2	0.584935	0.639	0.454	2.73887e-12
21	CG9328	0.591733	0.731	0.53	2.98337e-12
21	CG2082	0.804179	0.593	0.387	1.66509e-11
21	Teh2	0.532797	0.731	0.457	2.18726e-11
21	shi	0.586625	0.963	0.897	2.32632e-11
21	CG6329	0.63701	1	0.935	3.25481e-11
21	CG43778	0.627279	0.602	0.504	3.87324e-11
21	ATPsynbeta	0.669864	0.843	0.792	5.88482e-11
21	vib	0.524622	0.657	0.421	5.93174e-11
21	Rbp6	0.772909	0.972	0.846	7.21071e-11
21	HDAC4	0.507472	0.63	0.442	1.33083e-10
21	COX6B	0.61651	0.796	0.726	2.10864e-10
21	Bsg	0.597443	0.898	0.753	2.77099e-10
21	CG18812	0.538475	0.778	0.556	3.21896e-10
21	SdhD	0.534878	0.546	0.368	4.16511e-10
21	Shab	0.547552	0.574	0.476	5.76933e-10
21	eEF1alpha2	0.591351	0.917	0.838	6.96513e-10
21	CG7781	0.5295	0.852	0.738	2.76137e-09
21	Pglym78	0.523555	0.676	0.541	3.5136e-09
21	ATPsynG	0.591235	0.796	0.649	3.68598e-09
21	Syt7	0.505896	0.861	0.715	3.88602e-09
21	Mpcp2	0.556669	0.833	0.68	4.61632e-09
21	msi	0.606785	0.63	0.42	8.91002e-09
21	porin	0.593768	0.852	0.787	1.30218e-08
21	alphaTub84B	0.61824	0.769	0.655	2.23267e-08
21	scrt	0.624207	0.917	0.703	2.35219e-08
21	CG34370	0.510001	0.528	0.232	3.04715e-08
21	stnA	0.521993	0.972	0.883	3.3754e-08
21	CG43066	0.554634	0.75	0.522	5.54172e-08
21	para	0.575317	0.944	0.849	6.39461e-08
21	Ald	0.614008	0.954	0.819	6.75923e-08
21	qvr	0.50414	0.954	0.793	1.02488e-07
21	futsch	0.589839	0.981	0.907	1.8389e-07
21	Drep3	0.743355	0.269	0.084	2.7365e-07
21	CG31637	0.502874	0.417	0.219	2.74007e-07
21	Act5C	0.566727	0.889	0.809	2.89252e-07
21	RFeSP	0.513719	0.676	0.55	3.45323e-07
21	CG17193	0.752596	0.38	0.084	6.28606e-07
21	dally	0.604513	0.509	0.225	6.89791e-07
21	kdn	0.550665	0.639	0.444	1.02907e-06
21	CG14762	0.573611	0.731	0.419	1.24957e-06
21	dpr1	0.596553	0.5	0.261	1.59057e-06
21	rg	0.543623	0.88	0.721	1.73224e-06
21	tutl	0.523047	0.824	0.734	3.03052e-06
21	CG43902	0.961076	0.463	0.302	3.95937e-06
21	IscU	0.518623	0.731	0.604	5.75842e-06
21	Hsromega	0.641633	0.898	0.821	6.87959e-06
21	betaTub56D	0.613662	0.713	0.541	7.74552e-06
21	levy	0.5086	0.787	0.647	8.1923e-06
21	mbl	0.811655	0.944	0.527	1.18591e-05
21	CG14509	0.56358	0.694	0.574	2.85442e-05
21	Argk	0.520559	0.917	0.867	4.10517e-05
21	Octbeta1R	0.516428	0.417	0.186	0.000323095
21	acj6	0.743729	0.426	0.072	0.000811607
21	CG42458	0.542568	0.148	0.038	0.00106082
21	otp	0.558845	0.389	0.023	0.00106317
21	mirr	0.560615	0.407	0.049	0.00576094
21	Cbp53E	0.689154	0.769	0.576	0.013683
22	Tomosyn	1.98712	1	0.667	9.21417e-160
22	Mcm5	0.783973	0.49	0.001	5.47318e-86
22	Rdl	1.45384	1	0.924	2.41264e-73
22	pum	1.32651	0.971	0.727	2.31977e-65
22	CG42817	1.4021	0.837	0.16	3.95866e-57
22	Gprk2	1.09911	0.779	0.252	1.62776e-52
22	jdp	2.02213	0.99	0.77	2.53469e-51
22	14-3-3zeta	1.23888	0.99	0.984	1.11179e-50
22	CG6983	0.615386	0.519	0.09	2.67973e-47
22	amon	1.3004	0.962	0.578	6.09006e-47
22	5-HT7	1.11026	0.587	0.126	9.25004e-42
22	CG32432	0.960232	0.894	0.389	5.37e-40
22	cv-c	0.869853	0.654	0.04	2.28542e-39
22	LpR1	1.28346	0.808	0.299	5.49345e-39
22	Rab11	0.842501	0.625	0.364	2.94882e-37
22	Nep1	1.48162	0.923	0.064	2.87258e-36
22	nAChRalpha7	1.30351	0.923	0.563	1.36728e-35
22	Pde6	1.21084	0.837	0.369	3.53563e-35
22	mub	1.52518	1	0.78	8.72683e-33
22	CG18598	0.836331	0.51	0.004	3.18749e-32
22	Nhe2	0.821152	0.692	0.226	2.34194e-31
22	tinc	0.957798	0.76	0.171	4.42902e-31
22	CG5191	0.671709	0.452	0.125	4.95059e-30
22	Ac76E	0.59073	0.481	0.05	7.33782e-30
22	btsz	1.10299	0.721	0.132	1.49399e-29
22	alph	0.763504	0.74	0.292	1.97325e-29
22	CG2991	0.580556	0.558	0.167	4.19168e-28
22	Bsg	0.926037	0.962	0.752	1.52031e-27
22	CG43867	0.825704	0.76	0.424	4.32854e-27
22	dysc	0.936673	0.99	0.766	1.71792e-26
22	CG6006	1.22944	0.779	0.097	2.16087e-26
22	CG18208	1.31336	0.904	0.272	2.19923e-26
22	Mmp2	0.99983	0.712	0.153	2.67075e-26
22	Fas2	1.24385	0.885	0.281	9.76073e-26
22	Dat	0.999819	0.731	0.137	2.73671e-25
22	Sap47	0.876083	1	0.969	9.02134e-25
22	CG42613	0.988617	0.913	0.607	1.00706e-24
22	CG43778	0.886241	0.827	0.502	1.13134e-23
22	Poxn	0.790824	0.548	0.006	1.29998e-22
22	Appl	0.813099	1	0.961	3.2394e-22
22	CG7646	0.71574	0.894	0.678	3.68162e-21
22	CG17778	0.633148	0.538	0.152	5.00552e-21
22	Drl-2	0.836278	0.76	0.149	5.42331e-21
22	GlcAT-P	0.741475	0.798	0.312	1.1505e-20
22	slo	0.773895	0.942	0.746	1.376e-20
22	cac	0.787653	0.933	0.69	2.61817e-20
22	CG32392	0.545618	0.365	0.02	1.35965e-19
22	Oamb	0.698095	0.663	0.141	4.77182e-19
22	eEF1alpha2	0.75459	0.952	0.838	5.39601e-19
22	Dlic	0.540042	0.673	0.353	6.49549e-18
22	Efa6	0.54385	0.529	0.206	9.08305e-18
22	Rab5	0.598732	0.808	0.525	1.21427e-17
22	CG14687	2.94077	0.962	0.011	1.50692e-17
22	CG42795	0.839724	0.827	0.574	5.4545e-17
22	qm	0.729239	0.702	0.242	1.08099e-16
22	pgant5	0.519701	0.49	0.174	1.0999e-16
22	tapas	0.533745	0.577	0.22	1.38118e-16
22	Oda	0.652624	0.894	0.757	1.67822e-15
22	CG10947	0.544304	0.423	0.059	4.61454e-15
22	Argk	0.788971	0.933	0.867	5.83671e-15
22	Lim1	1.13311	0.837	0.19	3.84021e-14
22	Ndae1	0.508383	0.635	0.227	7.94636e-14
22	CG6282	0.502355	0.625	0.198	1.14418e-13
22	nvy	0.544005	0.567	0.108	1.27484e-13
22	SPoCk	0.650222	0.856	0.577	1.82495e-13
22	CG42260	0.604713	0.702	0.432	1.02923e-12
22	Gdh	0.578135	0.779	0.474	1.71218e-12
22	Ccn	0.830908	0.654	0.227	1.83712e-12
22	RhoGEF3	0.50385	0.519	0.275	2.0794e-12
22	Pitslre	0.542016	0.76	0.485	2.09137e-12
22	PMCA	0.60169	0.923	0.724	2.41568e-12
22	ctp	0.625502	0.981	0.929	3.38344e-12
22	Pdfr	0.568891	0.423	0.047	7.92161e-12
22	sdt	0.562373	0.76	0.404	1.12476e-11
22	Pka-C3	1.24929	0.615	0.071	2.14609e-11
22	Sytbeta	0.625828	0.625	0.195	2.42204e-11
22	Pde9	0.708484	0.827	0.496	3.27023e-11
22	GABA-B-R3	0.59269	0.375	0.072	1.1812e-10
22	CG34370	0.568533	0.712	0.23	1.53935e-10
22	gish	0.540616	0.817	0.619	2.23744e-10
22	Rbp	0.57775	0.875	0.587	2.23808e-10
22	brp	0.56797	0.913	0.767	5.80109e-10
22	CG32052	0.623533	0.644	0.278	6.56191e-10
22	cora	0.548531	0.606	0.26	6.82354e-10
22	Rbp6	0.765301	1	0.846	7.05988e-10
22	CG6329	0.6002	0.99	0.935	8.56022e-10
22	ara	0.996883	0.442	0.025	1.11854e-09
22	D	1.31653	0.827	0.061	1.63861e-09
22	caup	0.745477	0.413	0.026	1.64667e-09
22	X11Lbeta	0.542364	0.798	0.469	2.0812e-09
22	mAChR-A	0.557937	0.683	0.424	3.18444e-09
22	CG10077	0.521086	0.981	0.847	6.6316e-09
22	Tbh	0.857584	0.683	0.087	6.82064e-09
22	Gbeta13F	0.510734	0.962	0.874	1.0275e-08
22	Act5C	0.638901	0.942	0.808	1.1161e-08
22	CG44247	0.640354	0.837	0.429	1.44386e-08
22	CG30419	0.573499	0.635	0.17	1.88218e-08
22	Moe	0.501084	0.567	0.33	3.3234e-08
22	Spn	0.515392	0.798	0.536	4.7692e-08
22	Rgk1	0.646975	0.625	0.182	1.87441e-07
22	SoxN	0.886394	0.779	0.143	6.05288e-07
22	nAChRalpha6	0.616207	0.865	0.663	1.82773e-06
22	Dh31	2.3791	0.962	0.109	4.49721e-06
22	grn	0.800256	0.538	0.033	7.4693e-06
22	Sox21b	0.786655	0.635	0.058	1.07897e-05
22	CG14989	1.71377	1	0.391	1.12587e-05
22	rad	0.610362	0.731	0.446	2.64267e-05
22	unc-13-4A	0.584145	0.798	0.42	5.62317e-05
22	Rh7	0.583616	0.404	0.06	0.000126417
22	Eip93F	0.770008	0.856	0.301	0.00136148
22	CG34155	0.6488	0.538	0.138	0.00293665
22	Pka-R2	0.646774	0.904	0.636	0.00311317
22	bru3	0.540017	0.913	0.796	0.0136814
23	rg	0.650716	0.93	0.72	6.27808e-09
23	RapGAP1	0.595246	0.78	0.341	4.22903e-07
23	CG43902	0.998982	0.87	0.298	1.82171e-06
23	CG14322	0.704755	0.66	0.06	7.78847e-06
23	nAChRalpha7	0.580436	0.81	0.564	2.36485e-05
23	fkh	0.568194	0.55	0.073	8.08837e-05
23	dpr3	0.564494	0.41	0.234	0.000129579
23	beat-Va	0.501613	0.66	0.247	0.00230021
23	Gfrl	0.525506	0.79	0.432	0.00884735
24	CG11294	1.04885	0.6	0.004	1.13519e-105
24	VGAT	0.513856	0.624	0.197	7.36464e-07
24	Nckx30C	0.605562	0.918	0.796	5.04682e-06
24	Lim3	0.858317	0.718	0.055	1.4146e-05
24	cpx	0.645284	0.988	0.954	7.19648e-05
24	msi	0.507044	0.753	0.42	0.000457267
24	CG14989	1.58889	0.965	0.392	0.00488155
24	nAChRalpha7	0.500299	0.706	0.565	0.0168128
24	SoxN	0.682268	0.671	0.145	0.0385096
25	slp2	0.791463	0.662	0.005	1.78652e-49
25	slp1	1.0322	0.725	0.005	1.66292e-27
25	Dop2R	0.585553	0.825	0.646	0.0137052
26	wun2	0.919472	0.787	0.004	2.14244e-185
26	htl	0.836975	0.693	0.004	1.21918e-177
26	CG3376	0.814596	0.693	0.003	8.60314e-154
26	e	0.837657	0.64	0.003	2.4572e-150
26	CG6465	0.671629	0.547	0.007	1.81081e-87
26	Galphai	0.716482	0.52	0.008	3.25138e-73
26	GstD3	1.39574	0.827	0.009	1.89278e-68
26	fog	0.58513	0.467	0.009	1.0349e-63
26	Amph	1.43963	0.933	0.165	6.92069e-58
26	bbc	1.54167	0.947	0.268	9.84694e-57
26	Chd64	1.14863	0.853	0.068	2.75818e-52
26	mlt	1.35892	0.907	0.381	1.13808e-48
26	CG5273	1.10378	0.907	0.191	6.43976e-48
26	CG1537	1.5012	0.88	0.01	2.98144e-47
26	CG6770	1.54049	0.987	0.722	3.0935e-42
26	Cyp28a5	0.681948	0.573	0.008	4.37811e-41
26	RpL22	1.13167	0.92	0.204	7.47903e-41
26	CG8745	0.915216	0.6	0.07	7.18104e-36
26	MRE16	2.02229	1	0.746	1.11705e-33
26	wun	0.718479	0.72	0.089	1.8808e-32
26	CG31705	2.11508	1	0.057	6.28404e-32
26	Pino	0.700547	0.613	0.056	8.0434e-31
26	CR42491	0.60871	0.573	0.019	1.04226e-30
26	CG42342	1.6458	0.96	0.346	1.74841e-30
26	spir	0.849006	0.773	0.296	4.81168e-27
26	fok	1.18613	0.947	0.408	1.90597e-24
26	Hexo2	0.508466	0.36	0.009	9.65921e-24
26	Treh	1.02119	0.76	0.061	8.67265e-23
26	GstE1	0.842632	0.627	0.011	1.56013e-21
26	S	0.788597	0.693	0.167	3.92149e-21
26	Pdk	0.86925	0.72	0.073	5.46343e-21
26	GILT3	0.526969	0.507	0.012	8.68996e-21
26	Dat	1.12519	0.853	0.138	8.00107e-19
26	CG43693	1.57307	0.933	0.013	1.08163e-18
26	Gat	3.14276	1	0.037	1.87202e-17
26	flw	0.828099	0.867	0.444	4.53384e-16
26	CG46315	0.896577	1	0.758	5.70992e-16
26	Prosap	0.799722	0.893	0.407	1.40399e-15
26	Adgf-D	1.12887	0.827	0.016	8.21253e-15
26	CR40469	1.79844	0.613	0.323	1.34709e-14
26	CG1545	1.37806	0.867	0.021	2.08286e-14
26	CG9394	3.02401	1	0.041	1.22069e-13
26	Got1	0.601538	0.547	0.069	1.85931e-13
26	alrm	2.51953	1	0.013	5.1472e-13
26	Pif1A	0.903129	0.76	0.129	5.95728e-13
26	CG5758	0.971156	0.92	0.393	1.16628e-12
26	CG12730	0.594462	0.52	0.035	1.25721e-12
26	CG13631	1.43287	0.907	0.021	1.53783e-12
26	mbc	0.566781	0.493	0.022	1.65188e-12
26	CG7029	0.51374	0.68	0.267	3.23894e-12
26	ogre	1.78565	0.973	0.034	8.62352e-12
26	CG42240	0.783597	0.733	0.209	2.23673e-11
26	CG34367	0.543995	0.413	0.01	2.76661e-11
26	CG1358	0.803794	0.72	0.102	3.57503e-11
26	CG14688	1.05728	0.827	0.016	4.21676e-11
26	tal-AA	1.36496	0.853	0.021	1.04721e-10
26	Tet	0.709522	0.893	0.495	3.24947e-10
26	Gs2	3.07878	1	0.092	3.32486e-10
26	sty	0.697381	0.787	0.363	1.21602e-09
26	bdl	1.15037	0.787	0.024	3.12983e-09
26	Rh50	1.61038	0.973	0.022	3.95758e-09
26	rho	1.19966	0.76	0.09	3.97824e-09
26	dally	0.885409	0.76	0.224	5.71106e-09
26	Mdh1	0.526113	0.6	0.169	6.98199e-09
26	Inx2	2.04335	0.987	0.041	7.0747e-08
26	GstE2	1.15487	0.853	0.025	7.90445e-08
26	nrv2	2.04147	0.987	0.135	1.12061e-07
26	Eaat1	2.54638	1	0.035	2.77732e-07
26	CG1552	2.66257	1	0.047	4.31389e-07
26	CG32521	0.598247	0.533	0.114	4.60161e-07
26	CR45018	0.603893	0.427	0.014	8.89926e-07
26	Cyp9f2	0.651245	0.533	0.014	1.32475e-06
26	GstE12	0.749244	0.68	0.02	1.65466e-06
26	CG13707	0.61923	0.48	0.013	1.99804e-06
26	ninaB	0.828765	0.587	0.011	2.53254e-06
26	Tsp5D	1.8505	0.973	0.038	2.81027e-06
26	Msr-110	1.98895	0.987	0.046	5.36187e-06
26	mfas	1.24181	0.84	0.028	6.16833e-06
26	CG4409	1.42178	0.88	0.023	7.20839e-06
26	aay	1.32584	0.747	0.026	1.14089e-05
26	CG15209	2.18915	0.973	0.037	1.6234e-05
26	Adh	2.21152	1	0.14	1.73327e-05
26	Irk2	0.666089	0.627	0.021	1.99762e-05
26	GstD1	0.916503	0.733	0.058	2.73148e-05
26	CAH1	1.55059	0.933	0.034	2.8086e-05
26	CG14141	1.65017	0.92	0.031	3.18592e-05
26	CG7607	1.6999	0.973	0.037	4.33665e-05
26	GlcAT-P	0.551857	0.72	0.313	4.60763e-05
26	myo	0.522673	0.4	0.046	9.55912e-05
26	CG7888	1.40959	0.88	0.023	0.000481797
26	CG4829	0.832355	0.653	0.038	0.000687061
26	Gapdh1	0.511694	0.787	0.397	0.00077842
26	CG31974	0.655727	0.533	0.014	0.000826944
26	Cyp28d1	0.712826	0.613	0.018	0.00093724
26	mnd	0.921271	0.64	0.037	0.00109973
26	Cyp4g15	0.719676	0.573	0.014	0.00204352
26	vir-1	1.49962	0.92	0.043	0.00248986
26	CG6723	0.617828	0.507	0.017	0.00407714
26	zfh2	0.672838	0.747	0.168	0.00870314
26	CG8568	1.03741	0.533	0.005	0.0120509
26	CG10433	0.917873	0.68	0.039	0.015549
26	bnb	1.03649	0.733	0.031	0.0217099
26	Lsd-2	0.526851	0.467	0.018	0.023664
26	CG14945	1.3926	0.92	0.027	0.0467328
26	ct	0.724571	0.68	0.157	0.0470606
27	CG14340	0.510746	0.443	0.002	2.20138e-76
27	CG42750	1.25788	0.971	0.45	4.48841e-24
27	Drgx	0.67915	0.514	0.02	4.29143e-09
27	2mit	0.772052	0.829	0.428	2.61034e-08
27	SoxN	1.23626	0.914	0.144	3.01409e-07
27	CG2993	0.510207	0.757	0.47	9.55516e-06
27	CG32647	0.545735	0.714	0.359	0.000456137
27	zld	0.662318	0.5	0.12	0.000480241
27	CG43902	1.02713	0.9	0.299	0.000766829
27	CG1688	0.521409	0.586	0.134	0.0104432
27	nolo	0.515085	0.7	0.292	0.0122358
27	Lim1	0.732375	0.657	0.193	0.0241649
27	Sox102F	0.618898	0.514	0.047	0.0391829
28	Galphao	1.07495	0.978	0.86	1.31283e-18
28	Rbp	0.870886	0.935	0.589	1.01355e-11
28	mAChR-B	0.828504	0.609	0.082	8.6651e-10
28	jim	0.935364	1	0.929	4.49866e-08
28	bru3	1.11573	1	0.796	9.4109e-08
28	fax	0.913695	0.957	0.808	1.42307e-07
28	Rgk3	0.764424	0.522	0.136	2.17201e-06
28	CR42862	0.727809	0.891	0.73	3.4155e-06
28	pum	0.728287	0.913	0.729	4.04423e-06
28	Rgk2	0.602482	0.413	0.12	2.61435e-05
28	Rbp1-like	0.638572	0.826	0.606	4.50426e-05
28	CG10077	0.630567	0.957	0.848	4.79364e-05
28	brp	0.608393	0.978	0.768	0.000217037
28	Rho1	0.517306	0.63	0.355	0.000228484
28	CG6123	0.889271	0.652	0.324	0.000276146
28	CG30116	0.677418	0.674	0.329	0.000300893
28	CG16791	0.577566	0.891	0.624	0.000375596
28	CG1358	0.609709	0.326	0.106	0.000552991
28	Rim	0.641827	0.913	0.747	0.00061934
28	ssx	0.504132	0.696	0.355	0.00109443
28	bma	0.777785	0.717	0.217	0.00110613
28	Gbeta13F	0.562984	0.957	0.875	0.00189351
28	CG31140	0.557844	0.978	0.842	0.00300445
28	Galphaq	0.543742	0.674	0.492	0.00403911
28	nAChRbeta1	0.577312	0.978	0.833	0.00490987
28	CR31451	0.698465	1	0.949	0.00540997
28	ttv	0.511971	0.609	0.306	0.0055601
28	CG42540	0.568323	0.87	0.663	0.00816722
28	Df31	0.596481	0.804	0.593	0.00901948
28	Pka-R1	0.652391	0.87	0.59	0.010416
28	X11Lbeta	0.537274	0.783	0.471	0.0108802
28	FK506-bp2	0.504133	0.739	0.394	0.019752
28	CG8641	1.0825	0.522	0.136	0.0221782
29	mAChR-A	1.60816	1	0.424	1.35747e-35
29	CG12502	0.665891	0.488	0.075	5.00616e-15
29	CG31140	0.953087	0.953	0.842	4.43242e-13
29	Ald	1.02235	0.953	0.819	7.87919e-13
29	orb	1.42793	0.86	0.112	1.69165e-12
29	CG4587	1.02235	0.907	0.56	3.82925e-09
29	Tomosyn	0.887665	0.93	0.669	1.3623e-08
29	CG32264	1.03459	0.977	0.765	2.30282e-08
29	dlg1	0.862266	0.93	0.639	4.05363e-08
29	CG13739	1.16612	0.721	0.289	4.10981e-08
29	CG11537	0.675409	0.581	0.327	4.81559e-08
29	CG3625	0.653778	0.698	0.359	6.89631e-08
29	VGAT	0.842462	0.744	0.198	1.02598e-07
29	SPoCk	0.842995	0.86	0.578	2.00376e-07
29	pre-rRNA:CR45856	1.022	0.512	0.397	7.95586e-06
29	CG34384	0.940216	0.698	0.259	9.62163e-06
29	CG6329	0.761175	0.977	0.935	1.19402e-05
29	PVRAP	0.870518	0.698	0.207	1.56205e-05
29	Sap47	0.786547	1	0.969	2.72134e-05
29	dysc	0.824531	0.977	0.768	3.19526e-05
29	Bsg	0.780792	0.93	0.753	4.49615e-05
29	CG12531	0.6785	0.791	0.406	6.96916e-05
29	hth	1.16931	0.953	0.499	0.000112892
29	14-3-3zeta	0.677648	1	0.984	0.000338681
29	CG43778	0.738019	0.837	0.504	0.000371903
29	CanA-14F	0.758572	0.837	0.718	0.000396684
29	Rbp	0.767045	0.814	0.589	0.000409666
29	Sdc	0.660136	0.907	0.807	0.000476719
29	CG32017	0.942316	1	0.666	0.00056844
29	Frq1	0.895232	0.884	0.549	0.000593814
29	mub	1.14408	1	0.781	0.000616472
29	btsz	0.750637	0.628	0.136	0.00073916
29	Pka-R2	1.05494	0.907	0.637	0.000858343
29	CG10804	0.736677	0.744	0.385	0.00105364
29	Pkc53E	0.846311	0.698	0.493	0.00109927
29	Ggamma30A	0.851323	0.977	0.928	0.00216422
29	Nplp1	1.34257	0.698	0.204	0.00267383
29	nAChRalpha3	0.710659	0.465	0.291	0.00288007
29	CG8641	1.19455	0.651	0.136	0.00296793
29	CG8177	0.571725	0.744	0.428	0.00387877
29	Syt7	0.552079	0.93	0.716	0.00520468
29	jdp	1.03831	1	0.772	0.00535634
29	CG15765	0.870173	0.791	0.715	0.00693946
29	PMCA	0.508081	0.884	0.725	0.00736463
29	Sxl	0.64223	0.86	0.567	0.00740674
29	stnA	0.543135	0.953	0.883	0.0112209
29	Plc21C	0.527917	0.767	0.498	0.0125951
29	mtd	0.539468	0.977	0.83	0.0150632
29	tna	0.5692	0.86	0.481	0.0153561
29	bol	0.67575	0.953	0.75	0.0171369
29	cpx	0.680015	1	0.954	0.0197726
29	unc-13-4A	0.797258	0.698	0.423	0.0219697
29	Syt1	0.577235	0.977	0.942	0.0256888
29	CG13375	0.573198	0.581	0.342	0.0354601
29	Fife	0.643588	0.953	0.549	0.0359843
29	wdb	0.564669	0.953	0.724	0.0386407
30	CG43427	1.30146	0.943	0.257	5.72909e-24
30	CG13743	1.11617	0.914	0.283	3.76094e-12
30	comm	0.92213	0.714	0.157	2.2241e-07
30	run	1.08266	0.743	0.019	1.59863e-06
30	Octbeta1R	1.26749	0.943	0.185	2.14108e-06
30	pgant2	0.788277	0.571	0.225	2.69802e-06
30	emc	0.977238	0.971	0.528	5.37046e-06
30	CG42663	0.594862	0.429	0.046	2.68093e-05
30	cdi	0.520317	0.543	0.15	2.99317e-05
30	Khc-73	0.515605	0.657	0.38	0.00360237
30	Lasp	0.543341	0.571	0.047	0.00426571
30	mspo	0.769023	0.771	0.367	0.00434469
30	unc-13-4A	0.841495	0.943	0.422	0.00479654
30	DIP-beta	1.50637	0.943	0.144	0.028239
30	fkh	0.896941	0.771	0.075	0.0283157
31	CG10550	1.44145	0.88	0.003	2.67549e-158
31	CG6910	2.61018	0.84	0.003	9.46198e-138
31	CG6126	1.38483	0.84	0.001	1.5978e-129
31	CG4797	1.76366	0.88	0.001	5.58012e-129
31	CG8837	0.938352	0.8	0.002	1.70435e-114
31	lama	1.24547	0.8	0.001	5.59938e-107
31	CG5687	1.06993	0.72	0.002	7.49927e-103
31	Indy	1.42444	0.72	0.001	4.7812e-101
31	CG6836	1.06954	0.72	0.002	5.03387e-99
31	pes	0.819314	0.56	0.005	2.20838e-84
31	nec	0.90709	0.6	0.001	3.91062e-82
31	MFS14	1.02757	0.64	0.002	2.35439e-76
31	CG10226	0.983286	0.6	0.002	1.11684e-71
31	Dip-B	2.1711	0.84	0.016	5.6828e-71
31	Vha68-2	1.2721	0.88	0.008	1.60785e-69
31	CG4462	0.922701	0.56	0.002	7.14633e-68
31	CG5390	0.712073	0.52	0.001	3.46104e-67
31	cv-d	0.608499	0.56	0.001	1.0046e-66
31	Mdr49	0.999658	0.6	0.001	5.0151e-66
31	CG4991	1.2913	0.64	0.001	4.41434e-64
31	CG4630	0.541253	0.56	0.001	2.53463e-57
31	CG17027	0.608889	0.52	0.001	8.98579e-57
31	CG6231	1.0316	0.72	0.011	4.24486e-48
31	CG10444	0.82619	0.64	0.015	5.97105e-47
31	CG10184	0.518014	0.32	0.001	8.23384e-41
31	CR43870	0.891608	0.52	0	4.52992e-40
31	yip2	0.701901	0.6	0.01	2.39954e-39
31	Oda	2.01082	1	0.758	3.76868e-39
31	for	0.584964	0.4	0.003	2.27286e-35
31	CG16700	0.650767	0.48	0.001	1.2689e-34
31	CG4096	0.563853	0.36	0.001	9.22084e-34
31	Tret1-1	2.11654	0.8	0.022	2.64416e-33
31	scaf	0.786413	0.44	0.002	1.05048e-32
31	pirk	0.609376	0.2	0	3.02891e-31
31	Mdr65	0.564242	0.32	0.001	1.59374e-29
31	Cp1	1.56195	0.76	0.313	1.18237e-28
31	Sdr	0.983967	0.52	0.001	8.51787e-28
31	CG10702	0.539405	0.44	0.003	1.81036e-26
31	CG8475	0.85143	0.6	0.054	2.04977e-26
31	Gabat	2.12648	0.92	0.435	2.21288e-26
31	MRE16	2.87199	1	0.748	2.74773e-26
31	CG2852	1.74687	0.96	0.399	5.0545e-26
31	kar	0.777601	0.56	0.01	2.13082e-24
31	CG7834	0.84108	0.64	0.032	1.143e-22
31	scf	1.2654	0.68	0.091	1.40877e-22
31	Mipp1	0.563561	0.32	0.002	3.12627e-22
31	whd	0.575486	0.4	0.012	3.5227e-20
31	Sirup	1.98947	0.92	0.148	3.85175e-20
31	CG7220	1.41105	0.96	0.242	6.95882e-20
31	CG13255	0.780788	0.52	0.007	9.12364e-20
31	Mdh1	1.35593	0.8	0.17	8.63511e-18
31	CG15098	1.06194	0.64	0.069	2.25544e-17
31	eEF1alpha1	1.60485	0.92	0.202	3.07797e-17
31	Hex-A	1.68748	1	0.599	1.39221e-16
31	CG9413	1.64914	0.92	0.298	5.58983e-16
31	VhaM9.7-b	0.83417	0.72	0.125	9.23374e-16
31	SLC5A11	0.533398	0.44	0.008	9.90476e-16
31	CG7530	0.583799	0.4	0.004	2.71803e-15
31	pdgy	1.47289	0.8	0.023	2.9578e-15
31	CG4607	1.04059	0.32	0.003	3.34335e-15
31	CG12355	1.1381	0.8	0.13	7.53164e-15
31	wal	0.800328	0.64	0.038	2.17242e-14
31	CG42240	1.68912	1	0.211	4.77877e-14
31	CG11665	0.976889	0.72	0.242	2.3441e-13
31	Bsg	1.36319	1	0.754	7.31664e-13
31	RpS18	1.07498	0.92	0.521	8.62879e-13
31	betaggt-II	0.530774	0.6	0.054	1.46864e-12
31	CG11790	0.62333	0.56	0.065	2.34313e-12
31	RpS15	1.16954	0.96	0.543	7.22041e-12
31	l(1)G0289	1.02354	0.76	0.266	1.04271e-11
31	CtsB1	0.748513	0.28	0.118	1.12183e-11
31	gem	2.85632	1	0.085	1.7527e-11
31	sog	1.22423	0.72	0.009	1.84542e-11
31	Fer2LCH	1.1342	0.72	0.644	2.52534e-11
31	CycG	1.00262	1	0.727	1.76254e-10
31	CG17896	0.988287	0.56	0.036	3.5526e-10
31	CG2065	0.750929	0.12	0	5.80431e-10
31	CG12262	0.82064	0.52	0.019	6.95118e-10
31	Sap-r	0.625588	0.52	0.152	1.09218e-09
31	Fas2	1.80975	0.92	0.285	1.24353e-09
31	RpL27A	1.04184	0.92	0.536	1.2587e-09
31	Ssadh	1.02954	0.8	0.178	1.69246e-09
31	Cys	2.10559	0.92	0.02	3.73605e-09
31	RpS19a	0.893444	0.88	0.386	4.2108e-09
31	Hsc70-3	1.51791	0.32	0.455	4.83208e-09
31	cathD	0.831224	0.8	0.278	1.04927e-08
31	CG1146	0.60442	0.44	0.004	1.9114e-08
31	RpLP2	0.960174	0.88	0.399	2.06559e-08
31	CG3168	2.65947	1	0.018	2.57747e-08
31	CG13937	0.894486	0.64	0.251	5.48575e-08
31	Oatp74D	1.05257	0.44	0.017	7.45202e-08
31	CR40469	2.48544	0.68	0.324	8.28029e-08
31	sda	0.834669	0.64	0.103	9.16796e-08
31	Idh	0.69422	0.52	0.067	1.30524e-07
31	CG3902	0.561423	0.36	0.003	2.32305e-07
31	CG7781	0.918806	0.84	0.739	2.65565e-07
31	LpR2	1.31838	0.16	0.203	3.20708e-07
31	RpS26	0.903955	1	0.59	4.50994e-07
31	Snap29	0.500337	0.4	0.039	5.34722e-07
31	RpL37A	0.871704	0.96	0.549	6.41918e-07
31	CG17508	0.69366	0.56	0.17	7.12749e-07
31	RpS3A	0.865642	0.92	0.564	1.14596e-06
31	RpS29	0.909198	0.92	0.663	1.61663e-06
31	RpL10Ab	0.84256	0.76	0.457	1.66619e-06
31	RpLP1	0.874863	0.84	0.447	1.92095e-06
31	CG34136	0.919271	0.52	0.017	2.41146e-06
31	sea	0.680207	0.72	0.109	3.11238e-06
31	CG16758	0.582053	0.4	0.005	3.31081e-06
31	RpL17	0.83911	0.84	0.441	4.38106e-06
31	Pif1A	1.19921	0.8	0.132	4.86608e-06
31	tsr	0.801508	0.68	0.242	4.99704e-06
31	Got1	0.804077	0.68	0.071	7.15141e-06
31	RpS5a	0.791599	0.8	0.404	1.38357e-05
31	nuf	0.718997	0.44	0.118	1.93705e-05
31	PHGPx	0.676356	0.44	0.158	1.98813e-05
31	RpL13A	0.775535	0.84	0.473	2.19428e-05
31	RpS16	0.727122	0.8	0.378	3.4397e-05
31	Sar1	0.686079	0.52	0.325	4.60933e-05
31	pAbp	0.849883	0.92	0.847	5.66166e-05
31	CG10863	0.561909	0.44	0.061	5.8412e-05
31	RpS7	0.78234	0.76	0.56	6.01639e-05
31	crc	0.665993	0.64	0.194	7.10907e-05
31	RpL30	0.696173	0.76	0.324	7.96251e-05
31	RpL27	0.70912	0.92	0.458	0.000138639
31	RpS11	0.789549	0.88	0.572	0.000161279
31	CG30285	0.700071	0.6	0.011	0.000183347
31	CG32521	1.00194	0.72	0.115	0.00019083
31	Lsd-2	1.47185	0.68	0.02	0.000209944
31	CG2082	1.09668	0.88	0.388	0.000322592
31	Moe	0.864553	0.76	0.331	0.00034243
31	RpL18	0.694565	0.88	0.502	0.000353419
31	Dys	0.66023	0.56	0.133	0.000364829
31	eEF5	0.525271	0.6	0.241	0.000405837
31	Trx-2	0.680611	0.56	0.256	0.000416715
31	RpS20	0.732973	0.72	0.51	0.000417445
31	eEF1gamma	0.502458	0.48	0.132	0.000430504
31	CG8034	1.37751	0.76	0.014	0.000785886
31	pst	0.534655	0.48	0.006	0.000803546
31	RpL11	0.638111	0.64	0.376	0.00120344
31	RpL36A	0.688908	0.92	0.491	0.00131471
31	Lamp1	0.585539	0.68	0.382	0.00136892
31	RpL35A	0.650086	0.8	0.437	0.0017826
31	RpS27	0.710875	0.8	0.581	0.00182954
31	oys	0.555977	0.52	0.132	0.00235121
31	RpL19	0.671813	0.76	0.476	0.00241593
31	CG13907	0.698497	0.56	0.191	0.00255634
31	cib	0.587636	0.52	0.139	0.0026002
31	RpS10b	0.680702	0.84	0.513	0.00266721
31	kay	0.680282	0.24	0.119	0.0032098
31	Tsp42Ee	0.554539	0.52	0.149	0.00429369
31	RpS13	0.699666	0.72	0.472	0.00444158
31	Hsp83	0.883094	0.6	0.64	0.00446047
31	Fer1HCH	0.647113	0.8	0.584	0.00568458
31	vsg	0.596629	0.6	0.319	0.00662512
31	RpS24	0.639238	0.84	0.496	0.00685833
31	ena	0.595569	0.56	0.161	0.00687201
31	CG11791	0.825999	0.52	0.012	0.00756381
31	RpL8	0.580427	0.8	0.539	0.00763582
31	CG34417	0.897885	0.44	0.008	0.0086345
31	RpS17	0.680092	0.92	0.551	0.00880887
31	RpL39	0.858789	0.76	0.615	0.00937542
31	RpL3	0.609863	0.76	0.517	0.00969379
31	CG5273	0.551474	0.6	0.196	0.0104737
31	RpL28	0.673721	0.88	0.595	0.010937
31	sta	0.619869	0.76	0.413	0.0118862
31	Jafrac1	0.507557	0.56	0.26	0.0151007
31	Tctp	0.54293	0.64	0.266	0.0168996
31	CG5080	0.787289	0.2	0.001	0.0231822
31	RpS23	0.628488	0.72	0.514	0.0241754
31	Pdk	0.689442	0.64	0.076	0.02576
31	CG5793	0.501021	0.44	0.015	0.0296606
31	Lmpt	1.00067	0.76	0.058	0.0334304
31	RpL13	0.596914	0.8	0.571	0.0356753
31	RpL18A	0.590746	0.72	0.503	0.0357626
31	cnc	0.54753	0.48	0.186	0.035815
31	RpS8	0.614515	0.88	0.627	0.0387094
31	RpL7	0.597988	0.76	0.503	0.0419166
31	awd	0.6416	0.72	0.377	0.0432246
31	RpS12	0.631178	0.84	0.567	0.0437654
