# Supplementary material for: A single-cell transcriptomic atlas of the adult Drosophila ventral nerve cord
Source: eLife. 2020 Apr 21;9:e54074. doi: 10.7554/eLife.54074 (PMC7173974; doi:10.7554/eLife.54074)
Supplement: Figure 2—figure supplement 1—source data 2. — Table showing the average log-fold change (>0.5) values of cluster-discriminative marker genes, including adjusted p-values (<0.05). pct.1 is the proportion of cells that express the gene in the cluster, pct.2 is the proportion of cells that express the gene in all other clusters. [file elife-54074-fig2-figsupp1-data2.xlsx]

## Sheet: Davie et al. markers filtered
cluster	gene	avg_logFC	pct.1	pct.2	p_val_adj
0	heph	0.825467	0.789	0.568	0
0	CG14762	0.567921	0.828	0.481	0
0	jim	0.565298	0.994	0.947	0
0	CG31221	0.877826	0.968	0.708	2.31341e-295
0	dati	0.547354	0.7	0.29	1.87652e-254
0	pros	0.976317	0.945	0.668	1.09895e-227
0	Ddc	0.66306	0.76	0.473	2.4859e-187
0	jeb	0.651342	0.87	0.599	2.77287e-186
0	spab	0.817873	0.552	0.227	4.73192e-172
2	mbl	1.19384	0.836	0.564	0
2	sta	0.86283	0.979	0.838	0
2	sesB	0.764432	0.993	0.959	0
2	IscU	0.751966	0.974	0.853	0
2	RpS2	0.734907	0.985	0.903	0
2	futsch	0.716813	0.991	0.857	0
2	RpL37a	0.61894	0.995	0.958	0
2	COX4	0.577332	0.944	0.852	0
2	RpL18A	0.574024	0.974	0.859	0
2	Hsp60A	0.572153	0.818	0.59	0
2	fne	0.563112	0.995	0.892	0
2	ATPsynbeta	0.560712	0.97	0.885	0
2	RpLP0	0.559188	0.954	0.779	0
2	RpL7	0.548687	0.976	0.892	0
2	CG33181	0.545932	0.791	0.564	0
2	RpS12	0.545291	0.949	0.822	0
2	CG13928	0.543717	0.937	0.723	0
2	His4r	0.542673	0.995	0.955	0
2	mt:Cyt-b	0.538852	0.993	0.985	0
2	Rbp9	0.532029	0.826	0.514	0
2	COX7A	0.529971	0.935	0.831	0
2	sif	0.526429	0.915	0.699	0
2	mt:CoI	0.525878	0.995	0.989	0
2	ATPsynC	0.524503	0.986	0.948	0
2	RpL3	0.524195	0.951	0.83	0
2	qvr	0.511431	0.964	0.851	0
2	CG33199	0.503008	0.737	0.502	0
2	RpS8	0.502953	0.979	0.909	0
2	Unr	0.502293	0.982	0.892	0
2	UQCR-14	0.500364	0.888	0.736	0
2	RpS10b	0.52176	0.957	0.811	5.34026e-286
2	jeb	0.681509	0.861	0.608	1.66563e-280
2	RpS7	0.538746	0.979	0.89	1.31921e-279
2	RpS29	0.519026	0.98	0.902	5.02665e-270
2	Cyp1	0.557753	0.966	0.818	2.68623e-256
2	CR31451	0.507917	0.997	0.905	2.05333e-251
2	dpr21	0.640091	0.806	0.417	1.46678e-247
2	chic	0.503063	0.868	0.596	5.04619e-237
2	CG31221	0.755627	0.838	0.722	2.07308e-236
2	Msp300	0.580476	0.929	0.706	2.83373e-234
2	mamo	0.642873	0.868	0.6	1.18328e-233
2	Act5C	0.526336	0.965	0.79	1.8841e-219
2	Dop2R	0.732804	0.889	0.716	1.84036e-218
2	IA-2	0.555737	0.995	0.882	6.4576e-186
2	Imp	0.77235	0.813	0.23	1.71885e-154
2	hth	0.58147	0.747	0.545	4.39931e-128
2	vvl	0.553284	0.339	0.144	2.8705e-69
2	CG10527	0.540247	0.297	0.14	4.12184e-57
2	CG43689	0.597142	0.289	0.071	1.07763e-47
3	CG32017	0.84849	0.936	0.578	8.14066e-262
3	VGlut	1.04622	0.955	0.314	7.74227e-114
3	CR31451	0.582959	1	0.905	9.79021e-107
3	Nplp1	0.596133	0.582	0.185	1.91183e-56
3	IA-2	0.567704	0.993	0.882	4.24381e-56
3	Dop2R	0.633717	0.937	0.714	5.34509e-55
3	pros	0.636001	0.879	0.68	1.82804e-39
5	Hsromega	0.583519	0.986	0.971	9.24976e-166
5	jeb	0.786384	0.834	0.611	7.16733e-154
5	mt:CoIII	0.524414	0.988	0.955	6.03431e-132
5	mt:lrRNA	0.799167	0.994	0.937	2.62058e-129
5	mt:ATPase6	0.659468	0.998	0.988	2.62588e-127
5	CG31221	0.657758	0.808	0.724	7.77716e-116
5	mt:ND1	0.636574	0.899	0.673	4.99281e-109
5	Msp300	0.792972	0.935	0.708	1.47858e-105
5	VAChT	0.580065	0.696	0.556	9.17899e-100
5	IA-2	0.71248	0.983	0.883	7.58031e-88
5	mt:ND5	0.539963	0.878	0.684	7.2306e-85
5	spab	1.03826	0.43	0.245	9.45942e-69
5	Imp	0.614565	0.626	0.242	3.03595e-64
5	mt:ND6	0.592271	0.816	0.549	7.53489e-63
5	mamo	0.534593	0.713	0.609	1.25933e-56
6	IscU	0.713027	0.969	0.855	0
6	slgA	0.663768	0.923	0.686	0
6	Ssadh	0.629628	0.687	0.294	0
6	VGAT	0.600949	0.622	0.174	0
6	cpx	0.537436	0.985	0.92	0
6	CG9674	0.591519	0.649	0.335	8.26624e-293
6	CG32225	0.508583	0.485	0.156	1.03676e-285
6	sesB	0.597151	0.983	0.96	2.27829e-276
6	Fie	0.583957	0.823	0.66	2.86265e-261
6	CG10804	0.645681	0.808	0.44	5.31461e-256
6	CG32017	0.930951	0.919	0.582	3.84699e-235
6	CG14989	2.16082	0.982	0.306	4.48243e-230
6	RpL37a	0.535042	0.983	0.959	3.45758e-214
6	RpS2	0.58826	0.964	0.904	1.20998e-198
6	Gad1	1.8219	0.946	0.138	2.03861e-194
6	RpL5	0.525225	0.961	0.921	5.7829e-191
6	CG33181	0.532096	0.793	0.567	2.64741e-183
6	Hasp	0.502063	0.917	0.782	1.58692e-174
6	Hsp60A	0.509458	0.787	0.594	2.47699e-168
6	sta	0.605251	0.953	0.841	1.66726e-155
6	hth	0.821884	0.748	0.547	3.26815e-138
6	Msp300	0.584174	0.883	0.711	2.70919e-91
6	vg	0.538428	0.218	0.023	1.55764e-62
6	Nplp1	0.549384	0.454	0.193	1.22757e-51
6	pb	0.58815	0.193	0.008	2.91421e-38
6	Proc	0.52132	0.256	0.126	3.58926e-21
7	jim	0.618803	0.997	0.949	6.27928e-201
7	Six4	0.531095	0.201	0.004	1.3857e-122
7	pros	0.918753	0.945	0.68	1.011e-99
7	Optix	0.671227	0.38	0.059	8.14455e-46
7	spab	0.656401	0.39	0.247	2.95475e-45
7	Sp1	0.740944	0.251	0.011	4.83624e-40
8	Hsp26	2.50635	0.997	0.393	0
8	Hsp83	1.44579	0.994	0.7	0
8	stv	1.214	0.928	0.443	0
8	Hsp67Bc	1.98263	0.786	0.165	7.36855e-288
8	Hsromega	0.727919	1	0.97	2.90411e-279
8	DnaJ-1	1.26544	0.966	0.391	3.69571e-277
8	Hsp23	2.7416	0.951	0.241	3.76442e-269
8	Hsp27	1.99667	0.903	0.192	2.09675e-226
8	CR31451	0.541062	0.999	0.906	3.14231e-224
8	Hsp67Ba	0.807445	0.588	0.122	2.16026e-208
8	Hsp70Bc	1.76906	0.958	0.267	8.75419e-207
8	alphagamma-element:CR32865	2.11772	0.788	0.152	7.95636e-172
8	Hsp68	1.95625	0.868	0.206	1.69692e-169
8	Hsc70-3	0.63856	0.66	0.354	4.74872e-162
8	Hr38	0.714143	0.603	0.305	1.39972e-155
8	Dop2R	0.783547	0.919	0.718	4.87759e-126
8	Hsc70-4	0.631373	0.883	0.574	1.77222e-105
8	fne	0.535324	0.997	0.893	1.53944e-90
8	Sirup	0.595047	0.529	0.311	1.06376e-82
8	jim	0.638153	0.998	0.949	1.91512e-82
8	sr	0.54347	0.438	0.168	5.58532e-71
8	pros	0.52697	0.843	0.684	1.17342e-55
8	mt:lrRNA	0.665722	0.999	0.937	1.12834e-48
8	RpL29	0.508937	0.965	0.839	1.17658e-29
9	CG12822	1.50293	0.9	0.403	0
9	TM4SF	1.52995	0.997	0.768	1.23765e-300
9	sesB	1.37559	0.997	0.96	3.98682e-283
9	RNASEK	1.47444	0.999	0.909	1.57749e-280
9	CG3793	1.83377	0.924	0.271	1.8702e-271
9	Vha13	1.40007	0.995	0.879	1.11733e-263
9	cype	1.32684	0.985	0.854	2.05389e-254
9	nrv3	1.52876	1	0.946	1.08447e-251
9	Pgi	1.49837	0.941	0.411	9.11543e-249
9	Vha68-1	1.48513	0.978	0.633	1.55345e-247
9	Vha36-1	1.23804	0.987	0.754	1.6588e-243
9	Vha14-1	1.40776	0.991	0.745	1.8548e-242
9	COX4	1.10859	0.976	0.853	2.2644e-240
9	noe	1.26182	1	0.999	5.61791e-239
9	Neb-cGP	1.14364	0.943	0.703	5.3228e-238
9	Fie	1.2029	0.933	0.658	1.20632e-237
9	ATPsynD	1.31662	0.981	0.795	2.41489e-237
9	Gycalpha99B	1.03833	0.937	0.559	4.83493e-237
9	alphaSnap	0.994533	0.974	0.771	4.14748e-234
9	Pur-alpha	1.10647	0.967	0.745	6.77633e-234
9	Cam	1.61748	1	0.966	5.89082e-233
9	ATPsynF	1.14598	0.987	0.879	6.73734e-232
9	CG7582	1.39818	0.921	0.403	5.97043e-225
9	RFeSP	1.13035	0.97	0.782	4.46371e-224
9	CG7630	1.22562	0.982	0.839	1.76094e-222
9	CG31808	1.71013	0.959	0.596	1.72977e-220
9	gammaSnap1	1.08306	0.93	0.532	2.23203e-220
9	Gapdh1	1.53567	0.968	0.613	8.3182e-220
9	MESK2	1.14579	0.961	0.709	1.20593e-219
9	Hasp	1.35139	0.99	0.781	1.85437e-219
9	ND-MLRQ	1.25589	0.967	0.793	2.20287e-219
9	Dak1	1.46121	0.943	0.502	2.45369e-219
9	Drep4	0.850595	0.69	0.185	4.32093e-217
9	Mpcp2	1.08104	0.955	0.774	6.0283e-217
9	comt	1.00395	0.842	0.47	7.06683e-216
9	UQCR-Q	1.25157	0.967	0.764	1.2911e-215
9	CG13760	0.883106	0.705	0.257	2.25527e-215
9	Pdcd4	0.939199	0.984	0.788	7.16076e-215
9	CG13108	0.84471	0.752	0.288	1.16599e-214
9	ATPsynE	1.10302	0.954	0.755	6.75076e-214
9	CG3662	1.64115	0.996	0.811	1.97383e-213
9	Vha55	1.24468	0.986	0.727	3.1864e-213
9	UQCR-C2	1.07107	0.94	0.697	6.45354e-213
9	CG11138	0.734822	0.972	0.804	1.82182e-212
9	ATPsynG	1.12515	0.971	0.834	1.18326e-211
9	COX7A	1.09764	0.978	0.832	3.68297e-211
9	porin	1.30888	0.989	0.843	1.02024e-210
9	Cyt-c-p	1.50649	0.995	0.856	2.08107e-210
9	IscU	1.00566	0.984	0.855	4.07491e-210
9	ND-B22	0.832684	0.918	0.718	4.20446e-210
9	levy	1.07971	0.974	0.841	5.66822e-210
9	CG12237	1.06369	0.768	0.252	6.2666e-210
9	Dph5	0.783495	0.549	0.126	2.60369e-209
9	Vha26	1.41953	0.992	0.77	3.58914e-207
9	COX5A	1.16958	0.974	0.788	3.60355e-207
9	ATPsynC	1.31783	0.997	0.949	5.23804e-206
9	UQCR-C1	1.04486	0.933	0.684	4.81034e-205
9	shi	1.32258	0.998	0.855	8.81623e-205
9	Gabat	1.192	0.899	0.569	3.44265e-203
9	Scsalpha	1.20875	0.906	0.561	1.20753e-202
9	CG16779	0.591397	0.904	0.637	2.87275e-201
9	EMRE	0.876209	0.861	0.448	2.16865e-200
9	blw	1.14915	0.971	0.828	6.79171e-199
9	UQCR-11	1.31235	0.978	0.787	5.83876e-198
9	UQCR-14	1.2092	0.962	0.737	8.05904e-198
9	CG1909	0.826491	0.844	0.457	1.96902e-197
9	COX5B	1.13649	0.975	0.806	1.68028e-196
9	CG5903	0.878565	0.895	0.638	3.83344e-195
9	COX7C	1.09554	0.952	0.754	1.71173e-194
9	VhaM9.7-a	1.11128	0.985	0.825	1.05126e-192
9	ATPsynO	1.13244	0.964	0.757	1.24849e-192
9	slgA	0.927554	0.939	0.687	1.4304e-191
9	CG8974	0.867822	0.844	0.408	1.60118e-191
9	ATPsynbeta	1.08876	0.986	0.886	2.22213e-190
9	Sap47	1.52941	1	0.948	4.57601e-190
9	ATPsyngamma	1.08281	0.943	0.678	1.59618e-189
9	Fis1	1.06565	0.984	0.758	1.18792e-187
9	Ggamma1	0.955292	0.993	0.888	5.64799e-187
9	dpr7	0.722592	0.916	0.627	1.18834e-185
9	ND-ACP	0.987387	0.913	0.63	4.95226e-185
9	His4r	0.64977	0.994	0.956	2.20861e-184
9	Rop	1.25055	0.907	0.558	2.73237e-184
9	COX6B	1.12052	0.987	0.874	3.41133e-184
9	ox	1.22571	0.906	0.563	1.22241e-183
9	Mnn1	0.853476	0.983	0.756	1.57336e-183
9	Syx1A	1.20423	0.999	0.94	1.9126e-183
9	Vha16-1	1.19217	0.999	0.942	2.34118e-180
9	Vap33	0.820448	0.947	0.717	6.61405e-180
9	mei-P26	0.603413	0.993	0.939	4.10823e-179
9	Mlf	1.00246	0.953	0.601	6.26455e-179
9	COX8	1.1315	0.969	0.789	1.46467e-178
9	CG7407	0.933288	0.897	0.427	2.86088e-178
9	ND-49	0.851698	0.848	0.559	5.15193e-178
9	Vha44	1.00743	0.964	0.673	1.14293e-177
9	Cyt-c1	1.02269	0.902	0.611	2.31913e-177
9	ATPsynCF6	0.972739	0.948	0.788	7.91358e-177
9	Tom20	0.979383	0.914	0.617	8.79229e-177
9	Cchl	0.893387	0.85	0.468	1.16052e-176
9	CG6329	1.42961	0.999	0.865	1.30544e-176
9	qtc	0.72527	0.739	0.355	1.3635e-176
9	l(1)G0156	1.07105	0.895	0.545	9.15988e-176
9	ATPsyndelta	1.01619	0.904	0.649	1.0247e-175
9	Atg8a	1.25162	0.989	0.821	1.09156e-175
9	CG15628	0.981444	0.938	0.666	3.41932e-175
9	Nca	1.06883	0.913	0.604	3.69395e-174
9	roh	1.10397	0.966	0.778	4.71182e-174
9	CG42450	0.85649	0.975	0.772	7.47231e-173
9	ND-15	0.969045	0.932	0.637	1.67587e-172
9	veli	1.11033	0.916	0.443	2.33961e-172
9	sun	1.18187	0.9	0.603	7.53394e-172
9	ND-MWFE	0.975842	0.925	0.644	2.03946e-171
9	ND-18	0.841636	0.816	0.519	4.18591e-171
9	CG5010	1.05714	0.923	0.647	4.6236e-171
9	unc-119	0.733484	0.839	0.487	7.23235e-171
9	sif	1.18121	0.966	0.702	1.35019e-170
9	nSyb	1.06934	1	0.908	3.22832e-170
9	Hsp60A	0.648028	0.767	0.596	5.8486e-170
9	CG10340	0.683591	0.713	0.302	1.59992e-169
9	lap	0.924231	0.862	0.453	1.71452e-169
9	Gapdh2	1.34558	0.992	0.839	2.26617e-168
9	vig	0.952088	0.929	0.654	3.95544e-168
9	ND-13A	0.955475	0.859	0.521	5.35572e-168
9	ND-B17.2	0.88787	0.9	0.64	9.56959e-168
9	ND-19	0.915679	0.835	0.5	2.26482e-167
9	CG11099	0.607527	0.667	0.3	2.51476e-166
9	Gbeta5	0.995635	0.921	0.485	6.43637e-166
9	CG9821	0.75564	0.997	0.99	8.33683e-166
9	miple1	0.942584	0.999	0.893	2.56928e-165
9	CG4587	0.664184	0.969	0.771	5.06425e-165
9	CG31030	0.974453	0.979	0.766	2.2514e-164
9	Yeti	0.613392	0.919	0.703	5.74658e-163
9	Idh3b	1.01288	0.887	0.511	7.18061e-163
9	ATPsynB	0.981694	0.951	0.774	7.63227e-163
9	UQCR-6.4	1.12357	0.904	0.596	1.41401e-161
9	AIMP3	0.662232	0.758	0.313	3.92808e-161
9	ND-PDSW	0.799286	0.854	0.608	5.18281e-161
9	CG6115	0.759962	0.768	0.52	9.42636e-161
9	ND-13B	0.843724	0.846	0.548	5.55625e-160
9	PyK	1.21133	0.98	0.726	6.30388e-160
9	elm	0.939138	0.878	0.47	1.35288e-158
9	CanB	1.09948	0.982	0.734	1.50464e-158
9	ND-30	0.766649	0.805	0.53	4.06494e-158
9	futsch	1.07478	0.992	0.859	6.10516e-158
9	ND-B14.7	0.708919	0.836	0.555	2.33842e-157
9	CG4612	0.804817	0.906	0.614	5.66013e-157
9	CG17493	0.781306	0.821	0.454	2.50343e-156
9	qvr	0.548126	0.976	0.852	4.08056e-156
9	VhaAC39-1	1.02044	0.948	0.63	1.59973e-155
9	ND-B12	0.795301	0.802	0.548	4.33554e-155
9	CG3262	0.582676	0.735	0.365	1.17131e-154
9	Tim17b	0.860975	0.902	0.592	1.53849e-154
9	GC1	0.833281	0.688	0.278	1.04444e-153
9	ben	0.744239	0.853	0.573	1.18292e-153
9	ND-ASHI	0.820801	0.876	0.566	1.20604e-153
9	ND-B17	0.703628	0.792	0.525	2.81154e-153
9	CG17029	1.01148	0.764	0.201	3.89723e-153
9	CaMKII	1.03914	0.994	0.831	5.47727e-153
9	CG42361	0.739569	0.767	0.335	1.5174e-152
9	CG11876	0.812651	0.764	0.411	1.91909e-152
9	bsk	0.890394	0.864	0.553	6.65592e-152
9	CG1265	0.662686	0.634	0.209	1.42268e-151
9	nAChRbeta1	0.617125	0.949	0.755	2.72882e-151
9	Eip75B	0.82045	0.981	0.847	2.79147e-151
9	CG18467	1.37401	0.775	0.302	8.62956e-151
9	SdhC	0.830918	0.844	0.596	9.89377e-151
9	Pglym78	1.08787	0.966	0.712	2.47937e-150
9	eIF1	0.646163	0.867	0.607	4.31687e-150
9	CG3556	0.619772	0.69	0.404	5.67731e-150
9	DnaJ-H	0.686492	0.766	0.412	8.0591e-150
9	unc-104	0.826589	0.904	0.607	1.59159e-149
9	ND-39	0.780545	0.828	0.589	7.26908e-149
9	mRpS33	0.659221	0.634	0.32	3.17053e-148
9	ND-SGDH	0.720682	0.864	0.641	4.32072e-148
9	QIL1	0.941062	0.86	0.489	1.7196e-147
9	Arl4	0.793708	0.88	0.559	2.10365e-147
9	Gpdh	1.01693	0.842	0.442	2.69036e-147
9	Tom7	0.992627	0.847	0.524	1.02922e-146
9	Tsp42Ej	1.01207	0.957	0.665	7.49055e-146
9	ND-51	0.737291	0.868	0.627	1.79307e-145
9	CG9034	0.74658	0.814	0.504	2.25179e-145
9	Pgk	1.08117	0.934	0.561	2.6498e-145
9	ND-B14	0.888156	0.9	0.623	2.83411e-145
9	eff	1.05746	0.969	0.771	1.00037e-144
9	CG8245	0.825708	0.806	0.475	7.30824e-144
9	CG8613	0.669074	0.657	0.216	1.05372e-143
9	CG11267	0.827466	0.756	0.58	1.06163e-143
9	Tpi	1.09182	0.953	0.608	2.48724e-143
9	CG2224	0.768976	0.582	0.097	5.15239e-143
9	CG5676	0.769003	0.854	0.585	9.67521e-142
9	Grx1	0.77046	0.795	0.375	3.92109e-141
9	Cisd2	0.869034	0.784	0.467	8.08188e-140
9	MagR	0.591171	0.715	0.431	9.0431e-140
9	ctp	1.14997	0.999	0.961	1.17408e-139
9	VhaSFD	0.893167	0.899	0.508	1.28175e-139
9	ND-23	0.716797	0.84	0.603	1.50328e-139
9	SdhB	0.739267	0.829	0.576	1.51637e-139
9	Dlc90F	0.660278	0.729	0.337	6.49777e-139
9	ps	0.762637	0.996	0.961	7.68851e-139
9	His3.3A	0.759254	0.84	0.553	7.9401e-138
9	GlyP	0.766776	0.719	0.263	1.11587e-137
9	Atpalpha	1.0324	0.999	0.979	7.25988e-137
9	Gs1	0.874409	0.842	0.432	2.55281e-136
9	Snap25	1.02535	0.995	0.862	1.02406e-135
9	CG5916	0.576983	0.553	0.129	1.15958e-135
9	CG13928	0.872147	0.957	0.727	1.20079e-135
9	Evi5	0.530951	0.75	0.473	3.50724e-135
9	CG18815	0.84628	0.855	0.58	5.29958e-135
9	CG5068	0.598061	0.66	0.251	1.75719e-134
9	CG3907	0.549075	0.669	0.296	4.82021e-134
9	P5CDh1	0.820907	0.779	0.401	1.08573e-133
9	Eno	1.04339	0.983	0.789	1.81016e-133
9	ND-24	0.793873	0.784	0.437	2.79946e-133
9	Argk	1.23831	0.987	0.907	2.13838e-132
9	ND-42	0.815261	0.778	0.449	2.6314e-132
9	VhaM8.9	0.979768	0.956	0.683	1.42721e-131
9	CG41128	0.813608	0.908	0.647	1.63476e-131
9	Gdh	0.921208	0.833	0.501	5.60804e-131
9	Rbfox1	0.676833	0.967	0.862	1.32318e-130
9	mt:CoI	0.761997	0.999	0.989	2.57951e-130
9	CG32264	0.897464	0.934	0.774	2.6458e-130
9	Tob	0.646285	0.937	0.749	4.33049e-130
9	Ald	1.35283	0.994	0.802	4.71382e-130
9	SelR	0.818316	0.849	0.396	7.18781e-130
9	CG9919	0.588763	0.773	0.46	7.48792e-130
9	AP-2sigma	0.871319	0.884	0.515	3.11052e-129
9	Vha100-1	0.76063	0.801	0.421	4.39761e-129
9	mRpL24	0.575351	0.576	0.247	5.28888e-129
9	CdsA	0.83376	0.854	0.478	6.35607e-129
9	Mdh2	0.87531	0.882	0.633	8.15413e-129
9	ND-B14.5B	0.803618	0.851	0.577	1.11946e-128
9	eIF4A	0.818582	0.996	0.947	2.54238e-128
9	CG5214	0.798895	0.733	0.383	3.09809e-128
9	CG11474	0.73347	0.601	0.155	1.24029e-127
9	NP15.6	0.825456	0.808	0.447	2.01034e-127
9	CG31140	0.668752	0.883	0.596	1.06945e-126
9	Gie	0.619109	0.768	0.425	4.29813e-126
9	ND-20	0.758759	0.865	0.606	4.31068e-126
9	rdgB	0.778158	0.821	0.417	4.57556e-126
9	eIF4EHP	0.898165	0.893	0.613	9.83447e-126
9	CG12091	0.627803	0.753	0.422	1.07215e-125
9	ND-B15	0.807525	0.839	0.482	1.98825e-125
9	bun	0.895338	0.995	0.879	3.79768e-125
9	spen	0.52015	0.995	0.945	4.34382e-125
9	CG4678	0.69145	0.729	0.33	5.1145e-125
9	UBL3	0.669027	0.712	0.349	1.70199e-124
9	SdhD	0.806246	0.825	0.581	2.22906e-124
9	Hk	0.69806	0.948	0.777	3.5348e-124
9	Alk	0.562146	0.867	0.616	8.87602e-124
9	ND-B14.5A	0.802879	0.79	0.493	9.41191e-124
9	mts	0.895933	0.97	0.756	1.99815e-123
9	VhaAC45	0.900929	0.884	0.509	4.312e-123
9	DopEcR	0.87023	0.927	0.68	5.46645e-123
9	CG6878	0.569198	0.601	0.332	6.73466e-123
9	CG42392	0.873895	0.937	0.687	2.47544e-122
9	Acon	0.55835	0.616	0.384	3.78692e-122
9	Arf102F	0.739243	0.826	0.509	4.47911e-122
9	CG12004	0.624796	0.774	0.401	6.4012e-122
9	CkIalpha	0.819076	0.934	0.645	9.06469e-122
9	ND-75	0.655469	0.66	0.372	1.52426e-121
9	Jupiter	0.779529	0.913	0.612	2.5674e-121
9	CG1161	0.654878	0.789	0.387	5.85201e-121
9	kcc	1.09109	0.815	0.486	1.03819e-120
9	Nrx-1	0.560585	0.824	0.553	1.16492e-120
9	EndoA	0.911446	0.856	0.485	1.20811e-120
9	CG3009	0.751581	0.819	0.464	1.88019e-120
9	Rtnl1	0.764692	0.973	0.838	3.44559e-120
9	Dic1	0.806972	0.693	0.282	4.48468e-120
9	ND-B18	0.825497	0.784	0.408	1.39935e-119
9	skap	0.872931	0.82	0.499	1.51903e-119
9	CG7430	0.893755	0.813	0.44	1.70536e-118
9	RSG7	0.542563	0.779	0.505	1.81328e-118
9	CG32017	0.821851	0.774	0.588	1.37819e-117
9	CG2017	0.60748	0.705	0.289	1.85173e-117
9	eIF4E1	0.623859	0.865	0.618	5.48842e-117
9	CG8187	0.585811	0.61	0.189	5.74245e-117
9	Syt1	0.937871	0.99	0.878	1.00683e-116
9	CG11752	0.752465	0.761	0.466	1.16247e-116
9	CG33199	0.744685	0.839	0.504	1.22455e-116
9	sm	0.711722	0.973	0.815	1.42528e-116
9	RpL29	0.602296	0.957	0.839	2.78898e-116
9	CR31451	0.547443	1	0.907	4.26172e-116
9	CG8177	0.781379	0.797	0.392	1.07968e-115
9	Ubc6	0.735774	0.782	0.372	2.46311e-115
9	Rlip	0.547622	0.734	0.352	3.73945e-115
9	igl	1.78509	0.952	0.688	4.38125e-115
9	CG14767	0.767532	0.85	0.526	5.34931e-115
9	Tim8	0.664629	0.676	0.394	7.43204e-115
9	Pkc98E	0.74649	0.893	0.593	1.16281e-114
9	Rab27	1.40295	0.716	0.254	1.47743e-114
9	Chchd3	0.555972	0.613	0.318	2.52343e-114
9	stmA	0.755337	0.82	0.415	4.44898e-114
9	Ssadh	0.5979	0.567	0.3	7.46746e-114
9	sra	0.791665	0.819	0.374	9.64529e-114
9	14-3-3epsilon	0.722726	0.994	0.933	9.82214e-114
9	kra	0.776495	0.927	0.67	1.46053e-113
9	Maf1	0.503279	0.773	0.487	3.54693e-113
9	CG6767	0.831474	0.888	0.466	5.30554e-113
9	CanA-14F	0.711076	0.828	0.605	5.98535e-113
9	IA-2	0.624182	0.994	0.884	1.43671e-112
9	CG44242	0.875996	0.828	0.536	1.84565e-112
9	eIF1A	0.745864	0.957	0.775	2.59892e-112
9	dpr19	0.567156	0.775	0.445	5.56907e-112
9	CG9674	0.56425	0.627	0.338	6.27919e-112
9	RpL36	0.691096	0.987	0.924	1.94327e-111
9	Ran	0.712573	0.769	0.411	3.93367e-111
9	CG8481	0.62862	0.708	0.347	6.10925e-111
9	EndoB	0.63837	0.652	0.286	8.10485e-111
9	Sh	0.52097	0.992	0.908	1.42053e-110
9	Rab2	0.842419	0.915	0.595	3.06086e-110
9	CG11658	0.632653	0.694	0.237	4.26489e-110
9	CG30172	0.829299	0.964	0.733	4.51203e-110
9	Gs1l	0.641201	0.664	0.346	7.11271e-110
9	CG40178	0.529114	0.926	0.748	9.96248e-110
9	Ubi-p5E	0.900107	0.897	0.662	1.9808e-109
9	CG43066	0.69677	0.756	0.509	4.21271e-109
9	mt:ND4	0.838914	0.832	0.649	5.30494e-109
9	prel	0.683976	0.717	0.328	8.69879e-109
9	prim	0.605639	0.671	0.292	9.9079e-109
9	dpr21	1.13932	0.826	0.423	2.56461e-108
9	CG13937	0.655362	0.69	0.302	2.98835e-108
9	CASK	0.705267	0.936	0.709	3.2372e-108
9	Rab11	0.638763	0.738	0.442	3.63404e-108
9	tutl	0.618105	0.863	0.64	8.70555e-108
9	Pis	0.834051	0.875	0.49	2.68258e-107
9	Rbp1-like	0.562485	0.911	0.759	3.03723e-107
9	CG17059	0.627615	0.726	0.368	3.34297e-107
9	mge	0.61655	0.723	0.43	7.47135e-107
9	AnxB10	0.578524	0.545	0.322	8.42217e-107
9	CG9065	0.630114	0.78	0.519	1.30445e-106
9	Aplip1	0.682747	0.872	0.53	2.40545e-106
9	Bgb	0.549165	0.678	0.321	2.65254e-106
9	mt:CoIII	0.959134	0.997	0.955	3.09009e-106
9	Pp1alpha-96A	0.702077	0.862	0.54	4.83148e-106
9	Rad23	0.621191	0.757	0.404	5.68464e-106
9	mt:ND5	0.790232	0.806	0.688	1.17774e-105
9	Opa1	0.550289	0.67	0.396	2.72001e-105
9	alphaTub84D	0.576017	0.692	0.41	3.34925e-105
9	Droj2	0.75093	0.821	0.466	8.60701e-105
9	Fer1HCH	0.787063	0.987	0.89	1.23745e-104
9	l(1)G0334	0.839551	0.819	0.468	1.4892e-104
9	CG14591	0.654431	0.786	0.368	1.65715e-104
9	CG5946	0.509969	0.652	0.429	1.91979e-104
9	mt:CoII	0.740825	0.997	0.979	2.43449e-104
9	Tim23	0.544869	0.684	0.37	2.55139e-104
9	chinmo	0.667595	0.983	0.799	4.6314e-104
9	l(2)k14505	0.550668	0.593	0.224	1.38929e-103
9	Sod1	0.782147	0.918	0.697	2.25624e-103
9	RpL40	0.647693	0.981	0.93	2.71015e-103
9	Crk	0.535422	0.782	0.493	1.36252e-102
9	Pde6	0.768607	0.841	0.575	6.30691e-102
9	tko	0.530022	0.62	0.278	1.25657e-101
9	CG11486	0.643692	0.922	0.622	1.49287e-101
9	mtd	0.831571	0.96	0.726	2.32824e-101
9	mRpL55	0.574254	0.668	0.382	2.42344e-101
9	CG17026	0.542175	0.434	0.055	4.75297e-101
9	CG14464	0.658282	0.789	0.463	5.34218e-100
9	P32	0.508395	0.452	0.244	6.14538e-100
9	p120ctn	0.665229	0.906	0.669	7.20955e-100
9	CG7332	0.537084	0.689	0.32	9.20941e-100
9	CG3860	0.602271	0.643	0.269	2.23397e-99
9	CG17734	0.692577	0.828	0.446	3.82793e-99
9	CG8993	0.541474	0.718	0.455	6.48926e-99
9	metro	0.549733	0.59	0.221	7.14763e-99
9	CG13917	0.525757	0.925	0.769	7.38228e-99
9	Ho	0.573535	0.61	0.252	1.30177e-98
9	CG6770	1.10824	0.981	0.867	1.45643e-98
9	Sdc	0.734292	0.964	0.819	2.09986e-98
9	Cals	0.529544	0.848	0.642	2.1417e-98
9	CG34200	0.594318	0.614	0.274	6.99881e-98
9	Mpc1	0.661372	0.681	0.209	8.28224e-98
9	sky	0.719572	0.948	0.669	8.47231e-98
9	nAChRalpha1	0.612357	0.708	0.485	1.35437e-97
9	AP-1sigma	0.586697	0.75	0.422	1.44179e-97
9	Adk1	0.662821	0.711	0.351	2.04575e-97
9	rudhira	0.675918	0.964	0.78	2.04782e-97
9	Ipp	0.583368	0.787	0.42	8.36907e-97
9	CG3967	0.575228	0.677	0.343	8.40978e-97
9	CG14483	0.541484	0.659	0.421	1.08038e-96
9	CG14806	0.556528	0.63	0.293	1.18255e-96
9	CG32225	0.702492	0.482	0.158	1.20598e-96
9	SkpA	0.851589	0.903	0.615	2.07668e-96
9	VGAT	0.703481	0.454	0.182	2.24553e-96
9	cpx	1.3247	0.996	0.92	2.28557e-96
9	CG9328	0.924572	0.971	0.749	2.68295e-96
9	CG7781	1.15983	0.982	0.77	3.10541e-96
9	AdipoR	0.594206	0.691	0.323	3.7974e-96
9	mbl	1.00159	0.852	0.568	4.99992e-96
9	Rap1	0.67098	0.909	0.644	5.11202e-96
9	Rab14	0.701803	0.866	0.521	8.20965e-96
9	RabX4	0.560864	0.685	0.314	1.06957e-95
9	para	0.512144	0.927	0.836	1.0856e-95
9	Galphao	0.806613	0.942	0.692	2.18802e-95
9	robl	0.635508	0.773	0.399	3.24986e-95
9	CG17294	0.536446	0.637	0.234	1.39147e-94
9	cbx	0.55934	0.708	0.31	5.09956e-94
9	CG32278	0.787513	0.826	0.475	8.35182e-94
9	Syx6	0.694128	0.805	0.42	8.80054e-94
9	sgg	0.620094	0.895	0.667	1.70217e-93
9	TMS1	0.85919	0.898	0.603	1.78159e-93
9	Dhit	0.599805	0.899	0.643	2.48967e-93
9	PhKgamma	0.501226	0.783	0.494	3.69716e-93
9	CG13365	0.525641	0.583	0.297	3.80408e-93
9	alc	0.94202	0.913	0.549	5.36099e-93
9	lqf	0.536514	0.809	0.527	6.25569e-93
9	RpL14	0.536715	0.984	0.938	9.73006e-93
9	dnc	0.612891	0.948	0.812	1.10962e-92
9	Trp1	0.519504	0.806	0.507	1.26307e-92
9	mRpL28	0.569152	0.583	0.236	1.84174e-92
9	CG18549	0.580882	0.653	0.287	7.29969e-92
9	Csp	0.821687	0.833	0.439	1.43052e-91
9	mt:ND1	0.64789	0.804	0.678	1.44509e-91
9	Fer2LCH	0.788541	0.988	0.883	3.30276e-91
9	Pfk	0.767268	0.8	0.342	4.30727e-91
9	RhoGAP93B	0.540438	0.773	0.462	6.05811e-91
9	Drat	0.919005	0.934	0.648	6.19789e-91
9	Rab1	0.690534	0.876	0.561	1.12103e-90
9	CG4729	0.53573	0.611	0.263	2.93904e-90
9	scrt	0.50879	0.933	0.804	3.1378e-90
9	CG14207	0.635076	0.634	0.272	3.51807e-90
9	CG32486	0.616755	0.88	0.592	8.5342e-90
9	rdx	0.631811	0.779	0.434	1.34319e-89
9	lolal	0.632391	0.894	0.598	1.34649e-89
9	shep	0.730326	0.989	0.959	2.28869e-89
9	ghi	0.683647	0.688	0.277	2.32623e-89
9	Pcyt1	0.517887	0.615	0.354	4.6013e-89
9	CG13623	0.515229	0.595	0.254	2.11291e-88
9	Syt4	0.748366	0.91	0.643	2.65402e-88
9	muc	0.772813	0.705	0.322	2.72995e-88
9	mt:Cyt-b	0.738383	0.999	0.985	3.48793e-88
9	Gbeta13F	0.702681	0.982	0.899	5.90162e-88
9	CG32267	0.735294	0.807	0.426	8.06543e-88
9	CG6330	0.695604	0.632	0.289	1.01863e-87
9	Ih	0.645699	0.964	0.838	2.67085e-87
9	chrb	0.988405	0.968	0.73	6.38018e-87
9	PPP1R15	0.612439	0.723	0.302	6.47282e-87
9	CG4199	0.640012	0.478	0.123	9.34237e-87
9	eEF2	0.567498	0.792	0.609	2.4838e-86
9	kdn	0.663543	0.605	0.266	7.08483e-86
9	PMCA	0.798516	0.935	0.656	1.94892e-85
9	CG7646	0.988182	0.983	0.816	2.26821e-85
9	CLIP-190	0.537526	0.853	0.57	5.21678e-85
9	RpS25	0.661327	0.994	0.965	1.38603e-84
9	CG5282	0.538657	0.698	0.318	1.94989e-84
9	CG7990	0.754338	0.776	0.424	2.01206e-84
9	RpS27A	0.519293	0.946	0.855	4.52322e-84
9	Roc1a	0.56928	0.717	0.413	8.5724e-84
9	tipE	0.515643	0.567	0.308	2.21611e-83
9	Ntf-2	0.508443	0.714	0.378	3.21727e-83
9	ringer	0.995966	0.943	0.579	4.21483e-83
9	RpL24-like	0.544341	0.881	0.678	6.10589e-83
9	CG10804	0.831757	0.766	0.444	7.42631e-83
9	Stat92E	0.526126	0.541	0.223	1.32757e-82
9	CG12025	0.50014	0.795	0.497	6.75022e-82
9	ND-B16.6	0.692527	0.882	0.645	7.22708e-82
9	Mid1	0.553524	0.698	0.469	7.61678e-82
9	bip2	0.504281	0.882	0.673	9.49995e-81
9	Yippee	0.602217	0.725	0.307	1.30057e-80
9	fend	0.568396	0.81	0.498	1.56767e-80
9	Mob2	0.718407	0.849	0.543	1.94166e-80
9	nmo	0.707418	0.973	0.816	1.11216e-79
9	TfIIA-S	0.594796	0.715	0.353	1.45603e-79
9	RpL38	0.65127	0.987	0.925	3.74309e-79
9	CG34132	0.532699	0.513	0.219	4.13603e-79
9	Rbp6	0.792282	0.976	0.887	4.77011e-79
9	Lis-1	0.632536	0.844	0.593	5.09557e-79
9	nAChRbeta2	0.672949	0.765	0.354	5.62206e-79
9	REPTOR-BP	0.626905	0.782	0.428	8.34196e-79
9	qkr58E-3	0.643699	0.799	0.435	9.81042e-79
9	Syn	0.557286	0.759	0.493	1.1132e-78
9	14-3-3zeta	1.14604	1	0.97	1.70569e-78
9	lwr	0.569557	0.752	0.405	2.80369e-78
9	CG5644	0.533449	0.39	0.086	4.55182e-78
9	Tsp66E	0.775241	0.864	0.52	1.07087e-77
9	CG32052	0.861086	0.696	0.311	1.5528e-77
9	CG1695	0.525903	0.757	0.446	2.39653e-77
9	vib	0.646476	0.817	0.515	7.95758e-77
9	Pp2A-29B	0.520546	0.652	0.292	1.14553e-76
9	Ptp99A	0.644754	0.848	0.652	1.56718e-76
9	Pdp1	0.684681	0.992	0.938	2.73299e-76
9	Galphas	0.529314	0.766	0.465	3.145e-76
9	Rab4	0.538538	0.756	0.437	4.8255e-76
9	Oda	0.793215	0.992	0.929	6.76678e-76
9	CG7945	0.557486	0.736	0.409	4.5834e-75
9	STUB1	0.511968	0.65	0.278	6.86345e-75
9	CG3625	0.810359	0.871	0.52	7.72785e-75
9	Dop2R	0.574587	0.914	0.719	7.86746e-75
9	Rab3	0.811205	0.83	0.467	9.11698e-75
9	Rim	0.527497	0.981	0.817	1.43838e-74
9	l(2)k09913	0.64529	0.762	0.484	1.66886e-74
9	Ssdp	0.550461	0.906	0.688	1.78326e-74
9	Cdk5alpha	0.598793	0.764	0.409	1.90822e-74
9	Kank	0.581019	0.643	0.315	1.07866e-73
9	bel	0.580901	0.856	0.602	3.58549e-73
9	VhaPPA1-1	0.83427	0.888	0.552	6.18834e-73
9	CG14818	0.549323	0.78	0.482	1.16207e-72
9	shrb	0.535275	0.723	0.394	1.59113e-72
9	Syt7	0.663408	0.95	0.771	1.05115e-71
9	Rab5	0.651888	0.788	0.42	1.79263e-71
9	CG32544	0.628768	0.763	0.427	8.73574e-71
9	CG8602	0.663415	0.786	0.376	9.48224e-71
9	Pcd	0.824943	0.682	0.334	2.13484e-70
9	Diap1	0.579828	0.807	0.468	2.91914e-70
9	Vps24	0.549098	0.742	0.408	3.70253e-70
9	tow	0.530036	0.806	0.518	7.20309e-70
9	CG43737	0.560862	0.803	0.592	1.10317e-69
9	CR18854	0.564055	0.68	0.351	1.32339e-69
9	CaMKI	0.638328	0.816	0.466	2.37027e-69
9	CG13920	0.623713	0.787	0.489	1.23465e-68
9	Bsg	0.828417	0.964	0.787	1.32066e-66
9	Rpt6	0.537656	0.601	0.251	1.72238e-66
9	RpL15	0.804115	0.995	0.958	2.53199e-66
9	pros	0.591403	0.772	0.686	1.52798e-65
9	ari-1	0.518776	0.696	0.355	2.4978e-65
9	DOR	0.862144	0.93	0.616	6.42936e-65
9	Hsromega	0.685054	1	0.97	9.9166e-65
9	Ten-a	0.528206	0.964	0.873	1.05462e-64
9	dpr9	0.715435	0.755	0.508	1.15785e-64
9	CG31345	1.03005	0.333	0.128	1.23162e-64
9	7B2	0.515012	0.971	0.839	2.07431e-64
9	dysc	0.668655	0.993	0.874	2.67627e-64
9	stai	0.81163	0.973	0.781	4.14879e-64
9	PIP4K	0.565741	0.863	0.652	5.14791e-64
9	CG7920	0.581293	0.704	0.424	5.19955e-64
9	nAChRalpha2	0.535037	0.579	0.237	7.04336e-64
9	Chmp1	0.589284	0.725	0.343	9.98974e-64
9	Rdl	0.650418	0.994	0.902	1.84913e-63
9	Fas1	0.949411	0.957	0.697	2.03827e-63
9	beat-VII	0.550205	0.566	0.325	2.10275e-63
9	Socs36E	0.550083	0.742	0.373	2.42812e-63
9	Ip259	0.503684	0.841	0.613	3.27055e-63
9	CG3719	0.547858	0.668	0.298	3.51546e-63
9	Hs3st-A	0.594429	0.779	0.562	3.58652e-63
9	CG43324	0.660316	0.828	0.53	6.05601e-63
9	Trx-2	0.664041	0.718	0.421	9.72389e-63
9	Wbp2	0.575998	0.688	0.33	1.11869e-62
9	CG45049	0.606638	0.866	0.585	1.40347e-62
9	CG13743	0.575175	0.572	0.195	2.64204e-62
9	jeb	0.619415	0.83	0.613	4.26613e-62
9	CG13868	0.603906	0.786	0.523	3.57832e-61
9	CG7708	0.588407	0.415	0.215	7.48208e-61
9	beat-VI	0.7272	0.595	0.327	7.50105e-61
9	Frq1	0.760474	0.888	0.728	8.6738e-61
9	Pomp	0.520253	0.665	0.361	3.95687e-60
9	bru3	0.859059	0.941	0.7	4.32661e-60
9	Ric	0.607478	0.94	0.726	6.30751e-60
9	CG6044	0.777727	0.837	0.58	6.82721e-60
9	Hsc70-4	0.514394	0.786	0.578	9.01538e-60
9	endos	0.511521	0.666	0.357	6.58688e-59
9	alphaTub84B	0.556642	0.834	0.809	7.01861e-59
9	CG1648	0.873368	0.586	0.306	5.2702e-58
9	dati	0.557441	0.563	0.313	2.02331e-57
9	Arf79F	0.681568	0.844	0.593	3.74882e-57
9	Pde9	0.562665	0.839	0.67	1.39351e-56
9	CG15012	0.534183	0.78	0.471	3.06033e-56
9	CG1902	0.529722	0.585	0.191	9.95223e-56
9	CG9005	0.56067	0.816	0.486	1.74048e-55
9	trv	0.908711	0.835	0.602	6.32211e-55
9	CG11050	0.565448	0.691	0.319	7.11321e-55
9	Toll-6	0.539776	0.675	0.41	1.36272e-54
9	CG45050	0.50564	0.903	0.774	1.56894e-54
9	wry	0.591178	0.625	0.384	3.10652e-54
9	maf-S	0.557079	0.761	0.434	1.9334e-53
9	Appl	0.515245	0.961	0.846	4.44615e-53
9	Mapmodulin	0.662634	0.893	0.61	4.7173e-53
9	RpL41	0.594649	0.902	0.748	9.37348e-53
9	nAChRalpha7	0.594839	0.867	0.622	1.00402e-52
9	Ggamma30A	0.94381	0.949	0.861	1.22177e-52
9	Cbp53E	1.6804	0.899	0.61	1.87387e-52
9	sqh	0.545866	0.747	0.407	2.91187e-52
9	CR42862	0.521095	0.927	0.693	1.99362e-51
9	Cadps	0.52742	0.807	0.578	2.15401e-51
9	fwe	0.717082	0.784	0.435	3.2205e-51
9	CG1640	0.59262	0.711	0.403	1.0746e-50
9	Pka-R1	0.799595	0.781	0.462	3.96576e-50
9	AcCoAS	0.605566	0.456	0.195	8.80885e-49
9	CG2269	0.589437	0.936	0.752	4.70784e-48
9	hth	0.722632	0.731	0.549	2.90773e-47
9	CG14989	1.98099	0.557	0.323	5.63275e-47
9	CG1907	0.562276	0.527	0.217	2.26487e-46
9	CG15765	0.588214	0.747	0.518	3.14709e-46
9	pAbp	0.503265	0.944	0.844	4.26908e-46
9	Lamp1	0.728858	0.884	0.569	7.91982e-46
9	Men	0.530337	0.606	0.248	7.79951e-45
9	CG45263	0.519283	0.77	0.6	8.18601e-45
9	norpA	0.697406	0.892	0.638	1.65737e-44
9	Sfxn1-3	0.568902	0.62	0.257	3.26972e-44
9	CG3955	0.52083	0.679	0.355	3.90864e-44
9	CG34159	0.512232	0.653	0.312	5.84483e-44
9	klg	0.768351	0.75	0.535	5.01254e-43
9	Lcch3	0.535118	0.699	0.337	1.56419e-42
9	cmpy	0.672875	0.71	0.354	7.23155e-42
9	Tsp97E	0.64954	0.849	0.526	1.93694e-41
9	unc-13-4A	0.719069	0.649	0.35	8.05961e-41
9	CG8331	0.535721	0.62	0.351	1.1573e-40
9	CG43222	0.516957	0.599	0.314	1.4691e-40
9	Nckx30C	0.65856	0.89	0.691	2.37962e-40
9	dlg1	0.572993	0.925	0.722	4.04328e-40
9	MRE16	0.61953	0.985	0.909	1.41727e-39
9	CG17816	0.538211	0.77	0.558	1.32852e-38
9	Rab7	0.53341	0.688	0.339	1.41459e-38
9	heph	0.707177	0.736	0.58	1.85747e-38
9	Phm	0.576632	0.742	0.372	4.67731e-38
9	RpL39	0.585841	0.856	0.742	4.80241e-38
9	HmgZ	0.641172	0.885	0.726	7.10501e-38
9	CG15772	0.863368	0.748	0.352	4.04574e-37
9	BI-1	0.621711	0.83	0.486	5.49162e-37
9	CG33543	0.533524	0.504	0.306	2.00577e-36
9	beat-IIIc	0.650493	0.534	0.301	3.41575e-36
9	CG31221	0.986094	0.823	0.724	4.1129e-36
9	ChAT	0.881216	0.576	0.395	4.15657e-36
9	beat-IIIb	0.526883	0.646	0.429	7.9445e-36
9	nAChRalpha6	0.59093	0.952	0.776	8.06546e-36
9	Ddc	0.790715	0.675	0.489	2.93717e-35
9	Gad1	1.82618	0.384	0.159	6.98131e-35
9	CR30055	0.549133	0.669	0.262	2.52508e-34
9	CG44422	0.685994	0.594	0.322	3.85128e-34
9	Nplp1	0.740667	0.398	0.196	3.9802e-34
9	Bacc	0.635192	0.999	0.963	5.95766e-32
9	CG11317	0.658165	0.552	0.272	5.63033e-31
9	CG42342	0.58334	0.69	0.49	4.69567e-29
9	CG15309	0.519878	0.585	0.191	1.4448e-28
9	Ubi-p63E	0.651422	0.833	0.555	2.36163e-27
9	DIP-theta	0.567458	0.329	0.149	5.24328e-27
9	rad	0.810274	0.741	0.511	1.70741e-26
9	Proc	0.868367	0.334	0.125	5.60123e-26
9	Imp	0.57789	0.418	0.251	3.37876e-24
9	Pvf3	0.668573	0.625	0.504	4.1485e-24
9	Ktl	0.783519	0.784	0.435	5.06472e-24
9	beat-IIa	0.627104	0.591	0.384	7.71046e-22
9	CG32700	0.755154	0.669	0.43	1.61903e-20
9	jdp	1.23804	0.943	0.701	4.28161e-19
9	Fife	0.59008	0.714	0.474	1.27906e-18
9	flw	0.601501	0.888	0.727	1.45825e-17
9	Fer1	0.735231	0.107	0.044	5.76074e-17
9	roX1	0.699908	0.657	0.558	2.33955e-15
9	Pkc53E	0.707136	0.867	0.645	4.09759e-15
9	CG8861	0.849414	0.553	0.351	1.04971e-14
9	Atox1	0.754377	0.741	0.476	2.68238e-14
9	Eip63F-1	0.539272	0.523	0.284	1.36531e-13
9	mspo	0.517963	0.644	0.467	1.78604e-13
9	Scp2	1.53303	0.518	0.274	1.99756e-13
9	mlt	0.566298	0.777	0.401	1.31552e-12
9	CG13408	0.511862	0.248	0.098	1.66092e-09
9	twz	0.548783	0.275	0.123	7.80329e-07
9	CG12355	0.515138	0.585	0.305	2.33312e-06
9	Dh31	0.630945	0.188	0.098	0.000340727
9	CG33639	0.515377	0.434	0.206	0.0335649
10	CG18467	0.767701	0.68	0.305	1.00255e-205
10	jeb	0.786526	0.845	0.613	1.99666e-156
10	Mnn1	0.760351	0.974	0.756	1.43232e-145
10	dati	0.755073	0.681	0.31	5.79499e-145
10	Pdcd4	0.763029	0.979	0.788	2.68358e-133
10	CG3793	0.92931	0.791	0.275	4.49054e-132
10	CR31451	0.548726	1	0.907	8.79829e-117
10	spab	1.17055	0.505	0.244	7.85161e-111
10	ctp	0.739229	1	0.961	4.33426e-106
10	pros	0.754471	0.854	0.684	2.92853e-100
10	CG31221	0.683343	0.827	0.724	7.2917e-98
10	noe	0.969126	1	0.999	2.14823e-97
10	CG14762	0.509103	0.634	0.503	1.79233e-96
10	CG3662	0.967329	0.986	0.811	2.53607e-95
10	sm	0.67418	0.979	0.815	3.23873e-90
10	bru3	0.76475	0.956	0.7	1.07661e-87
10	heph	0.845655	0.793	0.579	5.65097e-87
10	Rab27	0.576751	0.568	0.259	3.34975e-78
10	spen	0.507237	0.996	0.945	1.37664e-74
10	Pgi	0.62911	0.76	0.417	3.10313e-73
10	CanB	0.717584	0.964	0.735	1.04757e-72
10	Ddc	0.72679	0.753	0.487	1.41742e-71
10	chrb	0.864451	0.972	0.73	7.6853e-62
10	CG2269	0.522179	0.916	0.753	1.35483e-59
10	Pde6	0.500297	0.784	0.577	9.7119e-59
10	Hasp	0.624902	0.948	0.782	1.08164e-58
10	Dak1	0.526902	0.792	0.506	2.76621e-57
10	Gapdh2	0.610688	0.964	0.84	4.27115e-55
10	14-3-3zeta	0.935747	0.999	0.971	1.92792e-50
10	Vha36-1	0.603054	0.955	0.755	6.45338e-49
10	CaMKII	0.771277	0.99	0.831	5.08364e-48
10	Ggamma1	0.50691	0.978	0.888	7.89033e-44
10	ChAT	0.561422	0.62	0.394	1.18372e-42
10	ringer	0.604354	0.894	0.58	3.10403e-42
10	Fis1	0.561914	0.945	0.76	9.4894e-42
10	rad	0.720247	0.746	0.511	1.67233e-38
10	TM4SF	0.782377	0.99	0.769	6.73504e-38
10	CG42450	0.521785	0.96	0.773	2.36214e-36
10	Pka-R1	0.505081	0.715	0.464	2.59169e-35
10	CG43737	0.55007	0.817	0.592	8.96213e-35
10	RNASEK	0.55667	0.983	0.909	1.22068e-32
10	Yeti	0.642366	0.925	0.703	5.33465e-32
10	Vha68-1	0.528216	0.901	0.636	5.48166e-32
10	klg	0.710818	0.736	0.535	5.94827e-31
10	Snap25	0.801572	0.984	0.863	6.88354e-31
10	futsch	0.694614	0.988	0.859	8.02979e-31
10	Atg8a	0.523498	0.968	0.822	1.19524e-30
10	beat-IIIc	0.525825	0.491	0.302	3.8952e-29
10	Vha14-1	0.616741	0.949	0.746	1.62577e-28
10	Cam	0.731428	0.999	0.966	2.17672e-27
10	Vha13	0.578688	0.988	0.879	1.59905e-26
10	CG17716	0.528264	0.616	0.42	4.33156e-26
10	VAChT	0.501564	0.701	0.557	2.46471e-25
10	fend	0.518855	0.789	0.499	5.7483e-23
10	Sap47	0.579055	0.999	0.948	1.56517e-21
10	CG42541	0.522358	0.653	0.551	3.41274e-21
10	jdp	0.992492	0.94	0.701	2.61954e-20
10	igl	0.592675	0.873	0.69	1.76058e-18
10	Eno	0.659421	0.957	0.79	6.51069e-15
10	Vha26	0.681173	0.969	0.771	1.03798e-13
10	mtd	0.597172	0.961	0.726	8.35617e-13
10	Vha16-1	0.653524	0.997	0.942	3.12676e-11
10	shi	0.693416	0.984	0.855	3.42841e-11
10	PMCA	0.52175	0.886	0.657	2.55102e-07
10	Ggamma30A	0.70728	0.942	0.861	7.35729e-06
10	Gapdh1	0.634678	0.889	0.615	2.62668e-05
10	Syx1A	0.712848	0.994	0.94	2.76465e-05
10	Syt7	0.522972	0.958	0.771	4.23313e-05
11	CG9394	3.03961	0.991	0.165	0
11	Gat	2.81338	0.954	0.109	0
11	Gs2	2.64981	0.991	0.268	0
11	CG1552	2.50088	0.987	0.183	0
11	CG31705	2.44777	0.964	0.092	0
11	alrm	2.42884	0.935	0.107	0
11	CG15209	2.27999	0.971	0.141	0
11	CAH1	2.13271	0.971	0.148	0
11	CG13631	1.83102	0.933	0.061	0
11	CG7607	1.81373	0.981	0.156	0
11	CG43693	1.71577	0.911	0.044	0
11	MRE16	1.67911	0.998	0.908	0
11	CG14141	1.65292	0.938	0.094	0
11	Tsp5D	1.62637	0.818	0.069	0
11	CG1537	1.61673	0.858	0.047	0
11	ogre	1.60176	0.902	0.069	0
11	Treh	1.50222	0.898	0.119	0
11	bbc	1.42804	0.772	0.271	0
11	CG1545	1.33539	0.737	0.065	0
11	Adgf-D	1.29068	0.633	0.061	0
11	wun2	1.26438	0.709	0.024	0
11	Chd64	1.20885	0.841	0.275	0
11	e	1.16812	0.635	0.017	0
11	CG42342	1.11876	0.848	0.486	0
11	CG8745	0.927977	0.646	0.116	0
11	RpL22	0.901919	0.86	0.398	0
11	Prosap	0.777666	0.924	0.744	0
11	flw	0.764854	0.904	0.726	0
11	CG6465	0.757837	0.464	0.02	0
11	mlt	0.728642	0.735	0.402	0
11	CR43459	0.679749	0.628	0.153	0
11	Amph	0.665578	0.655	0.262	0
11	CR43651	0.575705	0.415	0.057	0
11	CG31235	0.568646	0.464	0.015	0
11	wun	0.506139	0.446	0.134	0
11	CG14688	0.927406	0.532	0.044	5.06263e-303
11	CG34367	0.517002	0.397	0.022	7.84681e-301
11	Pino	0.502422	0.46	0.102	9.58618e-301
11	CG12730	0.954361	0.671	0.088	1.47178e-300
11	CR17025	0.62245	0.496	0.018	5.19078e-299
11	CG4409	1.71414	0.927	0.113	1.0329e-277
11	Galphai	0.584098	0.501	0.025	7.39714e-267
11	GstE2	1.1181	0.81	0.06	1.193e-262
11	bdl	1.05181	0.684	0.062	3.36127e-259
11	fok	0.613564	0.772	0.529	3.91049e-258
11	GstD3	0.985004	0.573	0.03	1.47254e-257
11	Msr-110	1.70369	0.974	0.126	2.68369e-246
11	CG13707	0.514969	0.465	0.031	1.68264e-240
11	Inx2	1.16517	0.653	0.05	4.84379e-239
11	Act79B	1.32264	0.322	0.009	9.63658e-239
11	Cyp28a5	1.08343	0.607	0.039	1.64526e-236
11	S	0.522984	0.623	0.266	5.99801e-236
11	Rh50	1.55529	0.846	0.065	2.11866e-233
11	CG32982	0.77647	0.826	0.29	2.14904e-227
11	rho	1.21621	0.754	0.13	1.08183e-224
11	mfas	0.865515	0.701	0.044	1.51462e-224
11	CR43334	0.77464	0.687	0.12	2.2267e-206
11	CR45018	0.636807	0.403	0.017	4.18849e-200
11	Eaat1	1.78086	0.929	0.079	7.03796e-199
11	Cyp4g15	0.902773	0.656	0.04	6.20834e-196
11	GILT3	0.703667	0.528	0.046	1.1122e-193
11	GstE1	0.832409	0.575	0.03	1.91908e-191
11	CG7029	0.557513	0.724	0.324	2.79284e-191
11	nrv2	1.39276	0.868	0.262	5.36997e-191
11	Pdk	0.630923	0.653	0.163	6.99755e-179
11	CG8369	1.36253	0.963	0.346	3.00459e-171
11	dally	0.732261	0.721	0.373	1.71428e-154
11	Rac2	0.712995	0.575	0.029	7.1505e-153
11	CG7888	1.28958	0.878	0.078	3.9613e-149
11	Dat	0.639373	0.543	0.209	2.1551e-144
11	GstE12	0.797987	0.689	0.09	3.91108e-144
11	CG1358	0.657043	0.645	0.184	5.61949e-144
11	Mdh1	0.520522	0.762	0.364	6.15872e-127
11	vir-1	1.30945	0.914	0.107	1.51464e-122
11	Irk2	0.733317	0.466	0.077	3.46289e-122
11	aay	0.663992	0.501	0.059	2.10734e-121
11	CG4829	0.578614	0.524	0.056	6.26155e-113
11	Hexo2	0.568134	0.502	0.043	1.87385e-109
11	Obp44a	0.984585	0.685	0.184	3.10999e-105
11	Sod3	0.858457	0.722	0.121	6.2713e-98
11	Cyp9f2	0.521793	0.5	0.048	4.7724e-89
11	CG15098	0.629223	0.714	0.208	2.67204e-84
11	CG32032	0.699943	0.618	0.05	2.05971e-76
11	CG31706	0.76607	0.689	0.111	1.83345e-75
11	CR40469	0.550293	0.451	0.095	1.19831e-70
11	CG6357	0.721307	0.6	0.064	5.23071e-57
11	eEF1alpha1	0.615286	0.877	0.434	2.39602e-55
11	CG14945	0.524583	0.42	0.043	1.96698e-53
11	CG10433	0.868869	0.747	0.1	1.12676e-52
11	CG3940	0.599843	0.586	0.09	1.64159e-51
11	Arc1	0.500318	0.324	0.036	4.48653e-46
11	AnxB9	0.742681	0.655	0.07	7.76146e-46
11	bnb	0.719186	0.593	0.071	1.96722e-32
12	Pka-C1	1.48445	1	0.719	0
12	Pka-R2	1.48231	0.994	0.424	0
12	mub	1.35079	0.998	0.679	0
12	jdp	1.30582	0.999	0.701	0
12	Rgk1	1.24193	0.952	0.192	0
12	CG32204	1.10912	0.868	0.156	0
12	prt	1.05621	0.824	0.037	0
12	Pkc53E	0.978326	0.994	0.644	0
12	GstD11	0.930138	0.727	0.01	0
12	rut	0.891138	0.88	0.292	0
12	Mef2	0.683129	0.827	0.344	0
12	cora	0.613186	0.703	0.205	0
12	Dop1R2	0.854179	0.82	0.159	1.59023e-246
12	dysc	0.587503	0.999	0.874	9.66983e-236
12	ab	0.814403	0.89	0.307	8.77051e-225
12	14-3-3zeta	0.705205	1	0.971	9.81659e-221
12	Pka-R1	0.724934	0.946	0.46	2.69508e-218
12	kuz	0.534005	0.825	0.441	1.09544e-205
12	Dop1R1	0.656903	0.761	0.22	6.52575e-196
12	CG32700	0.845123	0.967	0.424	7.07087e-183
12	mamo	1.11865	0.998	0.603	4.06714e-168
12	CG34402	0.788998	0.686	0.019	3.19835e-155
12	Bx	0.807451	0.878	0.236	5.6099e-150
12	CG17816	0.510721	0.861	0.557	3.12159e-138
12	CG11191	0.537929	0.67	0.238	4.80794e-137
12	Cngl	0.648225	0.999	0.788	1.37046e-105
12	rad	0.690861	0.992	0.506	1.44334e-97
12	toy	0.634515	0.849	0.266	9.51582e-93
12	Imp	0.957012	0.959	0.239	2.62567e-87
12	mspo	0.540418	0.905	0.462	5.41791e-77
12	sNPF	1.55498	0.995	0.186	5.63949e-69
12	fru	0.634677	0.896	0.372	3.17868e-66
12	Pka-C3	0.853629	0.834	0.108	5.28934e-62
12	Nep1	0.512374	0.56	0.049	4.12351e-56
12	DnaJ-1	0.571983	0.567	0.405	5.72864e-43
12	alphagamma-element:CR32865	1.00181	0.32	0.168	1.05092e-17
12	Hsp26	0.712821	0.532	0.408	0.000383624
12	Hsp27	0.525238	0.358	0.21	0.00589129
13	CG11294	1.29132	0.732	0.027	6.96807e-259
13	Lim3	0.826979	0.708	0.07	7.0454e-186
13	msi	0.714128	0.914	0.609	4.77454e-152
13	VGAT	0.642318	0.612	0.18	7.15256e-150
13	NLaz	0.757451	0.383	0.102	8.14648e-133
13	CG13739	0.942996	0.781	0.407	3.45698e-132
13	fend	0.503197	0.708	0.502	1.99631e-101
13	CG8861	0.984466	0.582	0.351	1.12487e-91
13	CG10804	0.626328	0.833	0.444	6.32943e-82
13	CG14989	2.05597	0.974	0.314	2.17622e-75
13	CG9328	0.504032	0.861	0.752	1.2945e-74
13	nAChRalpha7	0.521533	0.817	0.625	7.17253e-66
13	Gad1	1.91776	0.961	0.147	3.15356e-64
13	Dat	0.531068	0.491	0.212	1.9957e-59
13	cpx	0.591904	0.995	0.92	6.43486e-38
13	Nos	0.541791	0.263	0.084	8.4082e-36
13	bi	0.524805	0.46	0.218	1.48198e-32
13	hth	0.510696	0.73	0.55	5.01989e-32
13	Nplp1	0.613403	0.414	0.197	8.05368e-32
13	sNPF	0.561123	0.298	0.202	1.23433e-07
14	jim	0.532556	0.998	0.949	3.60545e-112
14	Mnn1	0.837385	0.98	0.757	3.68067e-108
14	sm	0.71872	0.988	0.816	9.79192e-101
14	IA-2	0.523176	0.986	0.885	1.66102e-96
14	CG18467	0.504047	0.559	0.309	2.76529e-95
14	Pdcd4	0.621955	0.964	0.789	4.25319e-88
14	pros	0.586782	0.94	0.683	4.88115e-84
14	Hasp	0.843785	0.983	0.783	4.28013e-70
14	CG16779	0.587442	0.924	0.638	6.22066e-70
14	bru3	0.518467	0.914	0.702	9.1868e-70
14	mei-P26	0.550865	0.998	0.939	1.82285e-65
14	CG31221	0.627038	0.951	0.722	3.50613e-58
14	CG3662	0.84659	0.993	0.812	1.20965e-54
14	CanB	0.534915	0.961	0.736	2.69067e-53
14	TM4SF	0.940635	1	0.77	2.9057e-53
14	Ddc	0.596048	0.791	0.488	4.68928e-52
14	Gycalpha99B	0.739291	0.926	0.562	3.04213e-51
14	spab	0.970236	0.694	0.242	9.77141e-51
14	CG31140	0.550015	0.859	0.598	7.27247e-49
14	Rop	0.799195	0.944	0.56	2.63272e-47
14	Ran	0.505265	0.694	0.415	2.67471e-47
14	chinmo	0.508142	0.978	0.8	1.38681e-46
14	Ggamma1	0.718472	0.998	0.888	1.45338e-46
14	RNASEK	0.796558	1	0.91	1.97423e-46
14	gammaSnap1	0.78035	0.933	0.535	3.75226e-46
14	Dak1	0.561234	0.841	0.507	3.88191e-46
14	Fis1	0.794623	0.989	0.76	6.90088e-46
14	ctp	0.874304	1	0.962	1.49782e-44
14	CG3793	0.596982	0.702	0.28	2.40784e-43
14	Snap25	0.592975	0.998	0.863	3.98716e-41
14	alphaSnap	0.527653	0.977	0.773	8.96024e-40
14	CG11099	0.589841	0.727	0.301	1.07092e-39
14	Mlf	0.557476	0.913	0.604	2.09953e-39
14	Hsp67Bc	0.954171	0.525	0.176	3.06046e-39
14	CaMKII	0.565387	0.989	0.832	8.37252e-39
14	Pur-alpha	0.87613	0.988	0.746	1.09393e-38
14	Vha36-1	0.773917	0.978	0.756	7.00892e-38
14	futsch	0.51294	0.988	0.86	1.19605e-37
14	CG30172	0.580814	0.973	0.735	1.5747e-37
14	CG14762	0.53375	0.791	0.5	3.35532e-37
14	Gbeta5	0.617489	0.835	0.489	4.58979e-37
14	CG42450	0.581432	0.971	0.773	6.75141e-37
14	Sap47	0.598669	1	0.948	1.03654e-36
14	CG7582	0.560164	0.797	0.409	3.99915e-36
14	klg	0.849035	0.869	0.534	6.88194e-36
14	Vha68-1	0.628776	0.931	0.636	8.28353e-36
14	shi	0.664044	0.994	0.856	1.51511e-35
14	Rtnl1	0.501862	0.971	0.839	4.15749e-35
14	nmo	0.71841	0.988	0.816	6.12136e-35
14	Syx1A	0.889626	1	0.94	7.27329e-35
14	VhaAC45	0.512709	0.848	0.512	2.32395e-34
14	EMRE	0.561111	0.822	0.451	4.16339e-34
14	CG2269	0.534173	0.963	0.753	5.21984e-34
14	Sdc	0.645997	0.974	0.82	1.0635e-33
14	14-3-3epsilon	0.668494	0.999	0.933	6.39493e-33
14	AGO1	0.565067	0.952	0.728	1.37714e-32
14	Pgi	0.693118	0.785	0.418	4.9683e-32
14	Fer2LCH	0.556882	0.992	0.883	1.37376e-31
14	Gapdh2	0.812256	0.994	0.84	2.2218e-31
14	CG15628	0.693711	0.948	0.668	5.92366e-31
14	side	0.552907	0.74	0.466	1.01224e-30
14	VhaM9.7-a	0.538998	0.983	0.826	1.02075e-30
14	Ptp99A	0.513658	0.864	0.653	7.28709e-30
14	CG31030	0.588206	0.981	0.767	9.88285e-30
14	7B2	0.550442	0.984	0.84	7.27305e-29
14	14-3-3zeta	0.871822	1	0.971	1.12761e-28
14	Cam	1.04402	1	0.966	1.17863e-27
14	beat-VI	0.508644	0.649	0.327	1.49861e-27
14	Rbfox1	0.534789	0.975	0.863	3.71833e-27
14	Gbeta13F	0.610322	0.994	0.9	4.87976e-27
14	ChAT	0.865066	0.791	0.392	8.36369e-27
14	CanA-14F	0.643112	0.9	0.605	1.05095e-26
14	Vha13	0.906265	0.999	0.88	1.83674e-26
14	Vha44	0.742296	0.961	0.675	1.06469e-25
14	Pcd	0.526627	0.666	0.337	6.40117e-25
14	Vha16-1	0.727146	1	0.943	2.36705e-24
14	eIF4EHP	0.63256	0.898	0.615	3.26498e-24
14	Vha26	0.626168	0.973	0.772	1.15673e-23
14	nSyb	0.934603	1	0.909	1.64245e-23
14	Atg8a	0.607363	0.991	0.822	2.48458e-23
14	Yeti	0.745458	0.962	0.704	3.05628e-23
14	shep	0.518055	0.998	0.959	3.52899e-23
14	CG40498	0.582762	0.915	0.594	6.5099e-23
14	Vha14-1	0.864353	0.988	0.747	1.03219e-22
14	Eno	0.951614	0.988	0.79	1.42797e-22
14	Fie	0.660377	0.921	0.66	3.01442e-22
14	Vha55	0.575783	0.963	0.729	3.44696e-22
14	CG5903	0.688645	0.92	0.639	9.03319e-22
14	Hsromega	0.559944	1	0.971	1.38148e-21
14	PyK	0.804937	0.984	0.728	2.19585e-21
14	kcc	0.521558	0.783	0.488	3.35204e-21
14	Hsp23	1.19659	0.865	0.25	1.02445e-20
14	DopEcR	0.56723	0.939	0.682	1.09984e-20
14	Hsp27	0.785066	0.619	0.205	1.47297e-20
14	CG43737	0.547724	0.868	0.592	1.83758e-20
14	VhaSFD	0.68525	0.902	0.511	1.89576e-20
14	AP-2sigma	0.727428	0.905	0.517	1.94834e-20
14	stmA	0.514403	0.764	0.419	2.01706e-20
14	chrb	0.709173	0.946	0.732	5.04869e-20
14	CG11267	0.515831	0.822	0.58	6.7609e-20
14	Ipp	0.595301	0.805	0.422	1.56936e-19
14	sky	0.645853	0.946	0.671	4.51666e-19
14	ringer	0.575277	0.921	0.582	1.30814e-18
14	His3.3A	0.563502	0.861	0.554	1.49715e-18
14	p120ctn	0.62362	0.948	0.669	1.77297e-18
14	Liprin-gamma	0.552669	0.905	0.639	3.63188e-18
14	Syt7	0.718708	0.988	0.772	1.41139e-17
14	CG5676	0.540611	0.87	0.587	1.8028e-17
14	veli	0.566706	0.819	0.448	2.24722e-17
14	slgA	0.572556	0.905	0.689	2.59297e-17
14	CG7646	0.543442	0.984	0.817	9.67748e-17
14	CG12822	0.504548	0.782	0.409	1.09867e-16
14	beat-IIIc	0.501521	0.546	0.302	6.68532e-16
14	toy	0.501837	0.557	0.274	1.07165e-15
14	Atpalpha	0.728712	1	0.979	3.49714e-15
14	CG9005	0.536459	0.835	0.488	5.25937e-15
14	sesB	0.614328	1	0.96	7.64094e-15
14	igl	0.58107	0.928	0.69	1.75519e-14
14	Hsp26	1.27861	0.963	0.399	5.65271e-14
14	CG9065	0.509379	0.817	0.52	6.26547e-14
14	nrv3	0.708449	1	0.947	6.66192e-14
14	COX4	0.730309	0.991	0.853	7.2872e-14
14	CG14591	0.503351	0.747	0.372	1.28371e-13
14	Tom20	0.565761	0.914	0.619	1.74216e-13
14	CG10340	0.505375	0.68	0.306	2.06478e-13
14	Hs3st-A	0.534646	0.841	0.562	2.78333e-13
14	CG7630	0.544015	0.982	0.84	3.12562e-13
14	Fas1	0.561032	0.937	0.699	6.21803e-13
14	porin	0.73112	0.993	0.844	1.053e-12
14	COX7A	0.675779	0.984	0.832	1.39747e-12
14	MagR	0.593166	0.812	0.431	1.72545e-12
14	rad	0.616246	0.774	0.511	2.35411e-12
14	vib	0.559764	0.858	0.516	3.10446e-12
14	Ald	0.854971	0.996	0.803	3.39798e-12
14	ATPsynD	0.859589	0.988	0.796	3.63326e-12
14	Pglym78	0.820568	0.968	0.714	3.86362e-12
14	Syt1	0.655751	0.998	0.879	6.95564e-12
14	ND-B17.2	0.678059	0.941	0.641	2.32106e-11
14	ATPsynF	0.761946	0.993	0.879	3.60636e-11
14	ND-13B	0.627092	0.883	0.55	3.79721e-11
14	Pgk	0.822988	0.935	0.564	3.92807e-11
14	CG1161	0.5663	0.788	0.389	5.24472e-11
14	CG32486	0.567956	0.899	0.593	5.76161e-11
14	Sod1	0.556995	0.926	0.698	9.67859e-11
14	Tsp42Ej	0.792763	0.967	0.667	1.08615e-10
14	MESK2	0.600772	0.954	0.71	1.29898e-10
14	RFeSP	0.778904	0.981	0.783	1.45233e-10
14	Cchl	0.617308	0.826	0.471	1.51132e-10
14	Tpi	0.905553	0.954	0.61	2.4671e-10
14	ND-ASHI	0.644591	0.905	0.567	8.21437e-10
14	ND-30	0.641049	0.864	0.53	8.6724e-10
14	ND-B17	0.521888	0.849	0.526	9.73296e-10
14	VAChT	0.726909	0.89	0.554	1.67735e-09
14	ND-24	0.54882	0.798	0.439	1.951e-09
14	UQCR-C2	0.574108	0.935	0.699	1.96322e-09
14	COX5B	0.735448	0.983	0.807	2.3122e-09
14	ND-B14.7	0.574028	0.845	0.556	2.73371e-09
14	COX6B	0.759398	0.993	0.875	3.44309e-09
14	Ggamma30A	0.768921	0.998	0.86	3.78709e-09
14	ND-19	0.687798	0.86	0.501	4.71534e-09
14	cg	0.540312	0.895	0.614	4.84078e-09
14	CG42342	0.5524	0.778	0.489	6.78667e-09
14	alc	0.640504	0.9	0.552	1.22279e-08
14	ND-ACP	0.689169	0.924	0.632	1.35413e-08
14	Hsp83	1.2549	0.991	0.703	1.86196e-08
14	COX7C	0.60423	0.963	0.755	2.12305e-08
14	Ih	0.52359	0.981	0.838	2.79373e-08
14	COX5A	0.849622	0.988	0.789	3.68014e-08
14	ND-PDSW	0.73305	0.93	0.608	3.73521e-08
14	alphaTub84B	0.644268	0.974	0.806	6.65882e-08
14	QIL1	0.604401	0.864	0.491	6.90755e-08
14	blw	0.674846	0.985	0.829	1.05294e-07
14	ATPsynE	0.630236	0.958	0.756	1.11919e-07
14	ND-18	0.62209	0.856	0.52	1.24122e-07
14	ND-B22	0.751454	0.973	0.718	1.29952e-07
14	Hr38	0.891511	0.814	0.303	1.45449e-07
14	UQCR-C1	0.578104	0.936	0.685	1.85002e-07
14	Gapdh1	1.0369	0.982	0.615	2.00846e-07
14	ATPsynO	0.890756	0.987	0.757	2.36768e-07
14	UQCR-14	0.651281	0.962	0.739	2.61669e-07
14	UQCR-Q	0.609126	0.968	0.765	3.10705e-07
14	CG9328	0.679116	0.971	0.75	4.18025e-07
14	jdp	0.911621	0.993	0.702	4.27527e-07
14	RpL24	0.6266	0.993	0.901	5.12589e-07
14	CG42541	0.631685	0.817	0.548	5.41768e-07
14	SdhC	0.524176	0.856	0.597	6.6476e-07
14	COX8	0.57724	0.972	0.79	6.82346e-07
14	ATPsynG	0.623295	0.979	0.835	9.40622e-07
14	ND-B14	0.706919	0.93	0.624	1.58554e-06
14	ATPsynbeta	0.509961	0.993	0.887	2.15724e-06
14	ATPsynCF6	0.612372	0.977	0.788	2.53262e-06
14	cpo	0.505463	0.978	0.822	2.91746e-06
14	ND-15	0.63823	0.929	0.639	4.80241e-06
14	CG32700	0.523135	0.662	0.432	4.91019e-06
14	cindr	0.5214	0.959	0.77	5.33631e-06
14	roh	0.627502	0.973	0.779	8.34549e-06
14	Cyt-c-p	0.539502	0.991	0.857	1.62045e-05
14	NP15.6	0.805414	0.903	0.448	1.95334e-05
14	Drat	0.518227	0.915	0.65	1.98969e-05
14	eIF2Bbeta	0.59016	0.631	0.155	2.03834e-05
14	l(1)G0156	0.562892	0.865	0.548	2.23e-05
14	stv	0.786139	0.876	0.449	2.26048e-05
14	ND-51	0.516899	0.88	0.629	3.54782e-05
14	levy	0.692625	0.989	0.842	7.1074e-05
14	ND-B15	0.527978	0.826	0.484	7.27013e-05
14	ATPsyndelta	0.533857	0.919	0.65	0.000109656
14	ND-23	0.565755	0.895	0.604	0.000129175
14	ATPsyngamma	0.691084	0.951	0.68	0.000133565
14	FK506-bp2	0.766174	0.954	0.623	0.000271067
14	ND-B14.5B	0.518952	0.861	0.579	0.000366652
14	Gpdh	0.509473	0.808	0.445	0.000379229
14	CG6329	0.67417	1	0.865	0.00041282
14	stai	0.510676	0.971	0.782	0.000476103
14	Ten-a	0.582268	0.97	0.873	0.000538266
14	Cisd2	0.664206	0.859	0.467	0.000718846
14	RpL10	0.642765	0.995	0.896	0.00116893
14	HmgZ	0.511392	0.919	0.727	0.00117852
14	ND-42	0.659497	0.847	0.449	0.00121485
14	ND-39	0.541864	0.871	0.589	0.00164894
14	CD98hc	0.735647	0.825	0.357	0.00171834
14	CG11876	0.524036	0.754	0.414	0.00250824
14	RpL36	0.728673	0.998	0.924	0.00346724
14	ATPsynC	0.574678	0.999	0.949	0.00433693
14	ND-B14.5A	0.534718	0.827	0.494	0.00465024
14	CG31808	0.76079	0.962	0.599	0.00546865
14	Mdh2	0.578903	0.906	0.634	0.00874858
14	Pdp1	0.547619	0.996	0.938	0.0134785
14	CG11752	0.545342	0.807	0.467	0.0182351
14	RpL19	0.512272	0.971	0.823	0.0236789
14	Obp44a	0.964784	0.966	0.181	0.0261157
14	CG7781	0.618788	0.98	0.772	0.0333579
15	disco	0.786872	0.639	0.058	7.93799e-64
15	disco-r	0.623498	0.546	0.055	5.21107e-56
16	CR32111	0.689175	0.511	0.012	0
16	ara	0.532933	0.427	0.011	1.90363e-192
16	jim	0.606741	0.994	0.95	9.34446e-125
16	caup	1.1213	0.683	0.023	1.08175e-81
16	CG32017	0.609104	0.789	0.59	2.64792e-45
16	CG14989	1.25087	0.658	0.323	2.36501e-31
16	Fer1	1.16171	0.43	0.038	2.20419e-30
16	pros	0.654749	0.888	0.685	3.10474e-24
16	Gad1	0.944024	0.56	0.158	2.20398e-22
18	CG12239	5.6665	0.295	0.08	0
18	CR44832	5.45229	0.251	0.072	0
18	Ms	5.32767	0.299	0.106	0
18	CG4577	2.78371	0.803	0.392	0
18	CG42394	2.19732	0.522	0.13	0
18	Gpb5	1.95374	0.577	0.181	0
18	7B2	1.77833	0.989	0.841	0
18	amon	1.55628	0.824	0.477	0
18	CG1275	1.54868	0.696	0.27	0
18	Pal2	1.53608	0.747	0.444	0
18	CG2269	1.53148	0.971	0.754	0
18	rhea	1.50245	0.443	0.142	0
18	RpS15	1.37908	0.974	0.891	0
18	RpL39	1.37889	0.929	0.742	0
18	CG30172	1.33629	0.954	0.737	0
18	Phm	1.33099	0.723	0.377	0
18	RpS13	1.32881	0.963	0.797	0
18	RpS7	1.23031	0.975	0.893	0
18	RpL18A	1.22197	0.969	0.862	0
18	CG13248	1.22094	0.604	0.174	0
18	RpL13A	1.16115	0.95	0.819	0
18	RpS20	1.15476	0.958	0.829	0
18	RpL37A	1.14869	0.959	0.825	0
18	RpS21	1.14734	0.918	0.741	0
18	RpL27	1.14388	0.921	0.75	0
18	RpLP1	1.13914	0.96	0.874	0
18	RpS12	1.13893	0.953	0.826	0
18	svr	1.13556	0.796	0.442	0
18	RpLP2	1.13513	0.97	0.832	0
18	RpS16	1.13485	0.898	0.67	0
18	TMS1	1.13337	0.879	0.607	0
18	RpS29	1.12971	0.974	0.904	0
18	RpS27A	1.12614	0.939	0.857	0
18	RpL3	1.11785	0.952	0.834	0
18	RpL10Ab	1.1062	0.95	0.796	0
18	RpL32	1.10343	0.946	0.841	0
18	RpL6	1.10265	0.984	0.89	0
18	RpL12	1.10145	0.923	0.821	0
18	Calr	1.09918	0.824	0.418	0
18	RpL30	1.09498	0.857	0.596	0
18	RpL28	1.09366	0.975	0.914	0
18	RpS10b	1.08865	0.948	0.816	0
18	RpL7	1.08513	0.96	0.895	0
18	RpS11	1.07361	0.974	0.888	0
18	RpS27	1.07004	0.964	0.907	0
18	RpS28b	1.0689	0.964	0.892	0
18	RpS9	1.06484	0.92	0.789	0
18	RpL26	1.06326	0.947	0.842	0
18	RpS23	1.06234	0.882	0.675	0
18	RpL7A	1.05967	0.936	0.813	0
18	RpL19	1.05568	0.938	0.824	0
18	RpL41	1.05476	0.892	0.75	0
18	RpS14b	1.04979	0.856	0.645	0
18	RpL31	1.04801	0.981	0.909	0
18	RpL38	1.04384	0.959	0.926	0
18	alphaTub84B	1.02539	0.948	0.808	0
18	RpS4	1.02292	0.964	0.879	0
18	Rack1	1.02247	0.903	0.713	0
18	His4r	1.02109	0.986	0.956	0
18	RpL4	1.02087	0.882	0.666	0
18	Tctp	1.01986	0.812	0.596	0
18	RpS3	1.01893	0.906	0.728	0
18	RpS15Aa	1.01789	0.915	0.745	0
18	CG43324	1.01638	0.876	0.533	0
18	RpS17	1.00866	0.926	0.839	0
18	RpL35	1.00773	0.914	0.797	0
18	RpS26	1.00663	0.952	0.899	0
18	RpL14	0.996717	0.978	0.938	0
18	RpL23A	0.996326	0.94	0.835	0
18	RpS14a	0.996307	0.927	0.826	0
18	RpL27A	0.996042	0.974	0.903	0
18	RpS8	0.992073	0.975	0.911	0
18	RpL10	0.990956	0.95	0.897	0
18	RpL37a	0.989718	0.984	0.959	0
18	RpS25	0.986565	0.989	0.966	0
18	RpS6	0.98302	0.911	0.775	0
18	RpL23	0.982852	0.963	0.905	0
18	Pdi	0.980976	0.659	0.265	0
18	RpL5	0.977463	0.97	0.922	0
18	RpL8	0.971889	0.964	0.871	0
18	RpL29	0.969822	0.945	0.841	0
18	CG42389	0.965415	0.836	0.535	0
18	RpL36A	0.961497	0.917	0.781	0
18	RpS24	0.956384	0.92	0.808	0
18	RpL11	0.950079	0.887	0.717	0
18	Rab2	0.938701	0.858	0.6	0
18	pAbp	0.936895	0.942	0.845	0
18	CG8331	0.935514	0.714	0.353	0
18	RpS3A	0.931007	0.951	0.888	0
18	Tapdelta	0.929658	0.563	0.176	0
18	RpL40	0.928758	0.974	0.931	0
18	RpL21	0.922559	0.975	0.923	0
18	RpL35A	0.908234	0.924	0.786	0
18	RpL18	0.906526	0.94	0.838	0
18	RpL13	0.90413	0.951	0.851	0
18	RpL9	0.89692	0.887	0.693	0
18	RpL24	0.89101	0.964	0.902	0
18	CG32276	0.885902	0.685	0.39	0
18	CG1943	0.868127	0.652	0.306	0
18	l(1)G0320	0.866347	0.669	0.372	0
18	RpL36	0.861102	0.964	0.925	0
18	SkpA	0.860817	0.848	0.619	0
18	Lamp1	0.844564	0.831	0.574	0
18	Arf79F	0.826983	0.842	0.597	0
18	Nmda1	0.798323	0.749	0.432	0
18	CG6184	0.795843	0.629	0.19	0
18	Clc	0.77894	0.715	0.485	0
18	Spase12	0.778621	0.576	0.232	0
18	twr	0.766673	0.579	0.249	0
18	RpL15	0.764926	0.981	0.959	0
18	CG10098	0.75768	0.616	0.277	0
18	CG12384	0.756394	0.803	0.532	0
18	Pfdn6	0.752689	0.694	0.395	0
18	ringer	0.73928	0.788	0.586	0
18	Atg8a	0.733937	0.921	0.824	0
18	CG13506	0.722692	0.463	0.127	0
18	CG5554	0.703497	0.526	0.228	0
18	Spase25	0.6786	0.526	0.175	0
18	Ufm1	0.672083	0.445	0.159	0
18	CG5885	0.659299	0.472	0.153	0
18	Spase22-23	0.655549	0.509	0.189	0
18	RpS19a	0.968445	0.861	0.661	1.81565e-303
18	pix	0.884228	0.699	0.36	4.81705e-296
18	Spp	0.578292	0.433	0.13	6.99803e-296
18	RpLP0	0.961981	0.932	0.785	2.66598e-292
18	CaBP1	0.630102	0.447	0.118	2.94118e-291
18	RNASEK	0.704005	0.959	0.911	2.56392e-286
18	robl	0.688253	0.706	0.405	1.55057e-283
18	RpL17	0.940941	0.924	0.773	8.17684e-283
18	fax	1.06573	0.915	0.668	4.61848e-282
18	RpS30	0.750911	0.922	0.851	1.52715e-279
18	eEF1beta	1.09045	0.742	0.394	2.9938e-278
18	TfIIA-S	0.647617	0.654	0.359	2.00744e-277
18	Hsc70-3	1.09081	0.725	0.358	7.07784e-277
18	PHGPx	0.750799	0.581	0.266	9.61946e-277
18	GC	0.648908	0.299	0.075	7.40663e-276
18	CG17841	0.868799	0.802	0.408	1.53467e-275
18	CG2918	0.709651	0.55	0.201	4.1701e-270
18	Vha16-1	0.660918	0.981	0.943	1.66261e-269
18	awd	0.952324	0.84	0.58	1.10403e-267
18	CG8401	2.34415	0.121	0.011	1.45353e-267
18	CHOp24	0.59566	0.643	0.348	3.65156e-267
18	sta	1.04847	0.951	0.843	2.52403e-266
18	CG43222	1.11697	0.749	0.315	1.07226e-265
18	stai	0.896802	0.964	0.783	6.05328e-264
18	CG12004	0.672358	0.726	0.407	7.87301e-262
18	CG44247	0.893542	0.607	0.221	4.2861e-261
18	Vti1b	0.505366	0.497	0.206	7.10924e-261
18	CG9391	0.665805	0.573	0.211	3.04511e-260
18	cathD	0.989787	0.814	0.422	6.52906e-260
18	Trx-2	0.799081	0.703	0.425	5.37541e-255
18	kri	0.511952	0.483	0.187	1.34719e-252
18	Ank2	0.912046	0.9	0.687	3.84143e-251
18	VhaM8.9	0.692535	0.893	0.688	1.52277e-250
18	CG1648	1.39338	0.699	0.308	2.02995e-247
18	RpL34b	0.726792	0.888	0.772	1.79175e-246
18	Gdi	0.72514	0.679	0.326	2.12152e-246
18	Flo1	0.572381	0.579	0.267	2.98035e-246
18	Lk6	0.833019	0.939	0.82	5.51016e-246
18	VhaAC45	0.744251	0.809	0.515	8.95356e-246
18	RpS5a	0.913301	0.867	0.666	9.73314e-246
18	Xbp1	0.805918	0.718	0.418	5.58331e-245
18	RpS2	0.918433	0.959	0.906	2.83668e-244
18	ctp	0.649195	0.992	0.962	9.73169e-244
18	Syt4	0.700166	0.843	0.648	4.24918e-242
18	Manf	0.566136	0.496	0.216	6.32555e-242
18	Wbp2	0.633185	0.611	0.336	7.97901e-242
18	eEF1gamma	0.816181	0.613	0.242	3.71484e-240
18	CG5174	0.661842	0.691	0.371	5.11009e-240
18	RpS18	0.830776	0.892	0.785	9.36326e-240
18	REPTOR-BP	0.599121	0.717	0.434	1.76364e-239
18	CG9231	0.723831	0.58	0.23	2.8096e-239
18	IA-2	1.49111	0.984	0.885	2.91664e-237
18	eIF4A	0.646391	0.978	0.947	4.73142e-237
18	CG5021	0.51381	0.499	0.244	5.37254e-237
18	CG30423	0.62263	0.687	0.427	1.99033e-236
18	VhaM9.7-a	0.65956	0.93	0.828	4.15284e-236
18	Msp300	1.22694	0.915	0.714	1.12209e-235
18	SsRbeta	0.505393	0.399	0.123	9.33797e-235
18	Rtnl1	0.655794	0.948	0.84	2.12379e-234
18	Srp9	0.52475	0.541	0.261	4.83337e-232
18	Sec61gamma	0.649265	0.663	0.382	3.35488e-229
18	Dad1	0.581433	0.556	0.235	6.9229e-229
18	betaTub56D	1.07193	0.818	0.545	5.31698e-227
18	CG6770	0.840163	0.972	0.869	8.68292e-227
18	eca	0.530895	0.534	0.249	1.3401e-224
18	CG15012	0.509634	0.733	0.476	8.32016e-223
18	tsr	0.933814	0.738	0.344	1.93844e-222
18	His3.3A	0.642749	0.791	0.557	3.10813e-222
18	CG33303	0.502777	0.539	0.234	1.22627e-221
18	CG31030	0.642538	0.929	0.769	1.58865e-221
18	ergic53	0.5255	0.459	0.121	1.7928e-221
18	Pis	0.609285	0.753	0.496	2.76649e-221
18	CG13364	0.568449	0.528	0.278	6.93929e-218
18	Rab3	0.729087	0.764	0.473	1.68173e-216
18	CG3662	0.622427	0.951	0.814	1.69619e-216
18	Sec61alpha	0.503616	0.417	0.125	3.22431e-214
18	Dhpr	0.66459	0.528	0.16	4.09699e-214
18	Fas2	1.32737	0.597	0.345	4.74358e-213
18	CG8860	0.548995	0.499	0.231	5.3884e-213
18	eEF2	0.734608	0.79	0.612	2.5755e-212
18	Glo1	0.687201	0.443	0.072	7.35603e-212
18	Su(var)205	0.593683	0.707	0.392	3.00857e-211
18	Vha36-1	0.60655	0.9	0.758	3.98185e-210
18	PMCA	0.658714	0.866	0.66	5.08958e-210
18	Gp93	0.518226	0.369	0.082	1.11205e-209
18	Sap47	0.646768	0.99	0.949	1.80953e-209
18	eEF1alpha1	1.31633	0.795	0.44	3.63882e-209
18	Sec61beta	0.58669	0.595	0.334	9.92353e-209
18	Nrg	0.715051	0.619	0.346	6.2339e-208
18	CG13887	0.549165	0.628	0.337	9.52996e-207
18	Cyt-b5	0.721765	0.683	0.325	1.00877e-205
18	Sar1	0.583763	0.646	0.408	7.00833e-205
18	noe	0.616316	1	0.999	3.44554e-204
18	Sod1	0.67372	0.837	0.701	2.22585e-201
18	Sytbeta	0.974411	0.607	0.192	4.70951e-200
18	Fer2LCH	0.743497	0.963	0.885	3.13848e-199
18	His3.3B	0.588336	0.814	0.571	3.59675e-197
18	Scamp	0.524479	0.609	0.322	6.30094e-196
18	smt3	0.651758	0.856	0.634	5.9144e-195
18	CG32441	0.522373	0.709	0.459	3.91061e-194
18	Ipp	0.520508	0.685	0.427	2.15007e-193
18	Rab9	0.617393	0.215	0.04	4.08713e-192
18	Arf102F	0.545934	0.727	0.514	1.05922e-191
18	sqh	0.562549	0.66	0.413	5.89988e-191
18	RpL34a	0.588471	0.655	0.401	9.03052e-190
18	ben	0.617128	0.783	0.577	3.06602e-188
18	Tom7	0.694652	0.788	0.529	4.99729e-188
18	miple1	0.647167	0.97	0.894	1.13252e-187
18	NUCB1	0.617666	0.672	0.394	5.11476e-187
18	CG40045	0.575987	0.737	0.477	6.98217e-187
18	Men	0.618959	0.594	0.253	3.17952e-186
18	ERp60	0.564093	0.534	0.194	1.46735e-185
18	Alk	0.743491	0.869	0.62	9.44482e-185
18	RpL24-like	0.599574	0.82	0.681	1.65312e-184
18	CG9646	0.532674	0.649	0.401	2.35635e-183
18	spidey	0.58438	0.697	0.428	4.10926e-183
18	eEF1alpha2	0.751414	0.876	0.664	8.5249e-183
18	lolal	0.516451	0.806	0.603	1.29643e-182
18	CG9813	0.701168	0.772	0.521	3.68011e-181
18	Tsp42Ej	0.576957	0.839	0.671	3.88774e-181
18	14-3-3zeta	0.563545	0.986	0.971	9.84395e-180
18	VhaPPA1-1	0.547953	0.762	0.558	1.18396e-179
18	Pcd	0.770579	0.724	0.338	2.17236e-179
18	CG13551	0.621347	0.655	0.389	9.03279e-178
18	CycG	0.568536	0.893	0.788	2.00892e-177
18	Nacalpha	0.573989	0.822	0.679	3.86708e-177
18	CG14767	0.561576	0.77	0.531	3.14024e-176
18	eEF5	0.665023	0.726	0.481	2.2332e-175
18	CG42817	0.689337	0.693	0.288	4.4714e-175
18	Gbeta13F	0.539562	0.963	0.901	7.79047e-175
18	CG31650	0.533622	0.591	0.304	1.42409e-173
18	Oda	0.634493	0.977	0.93	1.50152e-173
18	chrb	0.589638	0.858	0.735	3.05623e-173
18	Fer1HCH	0.696584	0.971	0.892	6.57045e-173
18	Proc	2.6636	0.328	0.128	2.06766e-170
18	CG3556	0.667412	0.677	0.408	2.43472e-169
18	CG17272	0.546756	0.654	0.378	5.3743e-169
18	chic	0.756002	0.861	0.605	1.44509e-166
18	Drat	0.549343	0.828	0.653	1.16559e-165
18	shep	0.676377	0.994	0.959	1.98667e-163
18	CG14207	0.525183	0.522	0.279	2.81724e-163
18	CG17778	0.572622	0.523	0.32	4.06905e-163
18	CG12163	0.631827	0.623	0.292	1.62968e-162
18	Pdf	3.78221	0.152	0.074	2.45455e-162
18	CG2852	0.790639	0.886	0.643	4.13769e-162
18	unc-104	0.664511	0.837	0.612	6.07397e-162
18	14-3-3epsilon	0.549098	0.965	0.934	1.73027e-159
18	Ran	0.593631	0.676	0.417	7.7014e-158
18	CG11077	0.52347	0.562	0.235	7.81953e-158
18	Cnx99A	0.52408	0.588	0.286	3.19519e-157
18	Pka-R1	0.711988	0.749	0.466	5.49138e-156
18	Appl	0.662345	0.952	0.848	2.51135e-155
18	CG31140	0.603207	0.864	0.6	4.31247e-154
18	Hipk	0.591099	0.694	0.436	7.14603e-153
18	eIF3i	0.544773	0.723	0.502	1.05475e-152
18	Uev1A	0.501707	0.561	0.295	3.34287e-151
18	Hrb27C	0.655508	0.939	0.849	9.03823e-150
18	cype	0.525354	0.911	0.857	2.8074e-149
18	CG8909	0.569703	0.706	0.375	1.20328e-148
18	CG11151	0.525478	0.571	0.296	1.5354e-147
18	bru3	1.0622	0.975	0.702	2.10397e-146
18	Hsc70-4	0.640062	0.801	0.581	1.33445e-144
18	Cyp1	0.770573	0.935	0.823	2.32136e-144
18	CG6044	0.780333	0.745	0.585	2.81586e-144
18	AnxB10	0.611016	0.525	0.326	4.2145e-143
18	CG3262	0.55238	0.666	0.371	2.8995e-142
18	Sytalpha	0.654501	0.431	0.249	2.99309e-142
18	Pdcd4	0.572567	0.94	0.791	1.5257e-139
18	Rho1	0.541472	0.696	0.414	3.01078e-138
18	CtsB1	0.740925	0.699	0.366	1.17987e-137
18	CrebA	0.975141	0.369	0.036	2.3589e-137
18	ATPsynCF6	0.503105	0.886	0.791	1.43265e-134
18	pum	0.529169	0.984	0.952	7.59311e-134
18	CG11486	0.510338	0.862	0.627	2.4992e-132
18	Vap33	0.524624	0.86	0.721	5.46029e-131
18	Neb-cGP	0.50631	0.82	0.708	7.27787e-131
18	Ubi-p5E	0.511892	0.808	0.667	1.98625e-130
18	futsch	0.672285	0.959	0.861	1.61961e-129
18	mt:ATPase6	0.636629	0.996	0.988	1.489e-128
18	ITP	3.95044	0.12	0.035	4.17778e-127
18	CG15628	0.603829	0.854	0.671	1.00328e-126
18	mbl	1.30569	0.939	0.571	2.86608e-124
18	Ten-a	0.579635	0.952	0.874	1.44405e-123
18	alpha-Spec	0.510932	0.6	0.327	4.59038e-123
18	prim	0.600587	0.523	0.299	1.1715e-120
18	Cals	0.518537	0.851	0.645	1.27718e-115
18	Df31	0.627683	0.742	0.469	3.73122e-114
18	Xrp1	0.630919	0.606	0.289	9.72757e-113
18	mt:lrRNA	0.58197	0.975	0.938	2.09683e-106
18	fne	0.578283	0.984	0.895	1.24099e-100
18	Arc1	0.622262	0.18	0.042	6.05587e-98
18	nolo	0.538504	0.295	0.193	1.69101e-97
18	CG10527	1.50656	0.399	0.143	1.34678e-95
18	AnxB9	1.20398	0.303	0.082	1.20511e-94
18	Tsp42Ee	0.540923	0.57	0.29	4.71354e-94
18	fru	0.889365	0.631	0.38	3.98331e-93
18	Calx	0.533099	0.535	0.247	9.07001e-92
18	brat	0.505205	0.735	0.437	1.70415e-91
18	IscU	0.561329	0.915	0.858	1.83747e-89
18	Cbp53E	0.522555	0.631	0.618	1.12891e-86
18	CG43737	0.506724	0.707	0.596	2.03327e-85
18	cv-2	0.581266	0.348	0.052	2.45114e-85
18	twit	1.91779	0.341	0.01	7.12193e-82
18	RpL22	0.644997	0.645	0.407	8.50559e-82
18	sNPF	1.9718	0.351	0.202	1.50894e-77
18	CG15765	0.599157	0.789	0.52	6.28759e-76
18	CG17716	0.547329	0.718	0.421	9.57233e-74
18	Cp1	0.54528	0.684	0.405	2.4679e-69
18	prt	0.583653	0.315	0.051	2.67895e-68
18	lbm	0.569679	0.192	0.015	3.19236e-67
18	CG43729	0.592395	0.894	0.712	2.52805e-63
18	CG34155	0.685572	0.333	0.139	2.57015e-62
18	CG30053	0.894144	0.14	0.003	1.33192e-60
18	Hsp23	0.72293	0.516	0.259	2.69864e-60
18	Nep1	0.574761	0.325	0.056	8.00241e-56
18	CG33543	0.524587	0.52	0.308	1.38946e-55
18	CG45263	0.535539	0.703	0.603	4.64335e-53
18	mamo	0.659525	0.687	0.611	8.1676e-50
18	CG14274	0.768914	0.224	0.077	1.17711e-49
18	CG31345	0.63555	0.371	0.13	1.43217e-49
18	Tk	2.22113	0.205	0.087	1.1493e-48
18	Imp	0.925866	0.546	0.251	1.63445e-47
18	Eip93F	0.511856	0.553	0.335	2.86945e-47
18	Nplp1	0.96029	0.339	0.2	2.41414e-46
18	Vkor	0.518666	0.119	0.015	1.88626e-44
18	Dop2R	0.614529	0.876	0.722	9.99144e-42
18	CG1402	0.599704	0.312	0.08	1.79344e-38
18	Mmp2	0.556657	0.582	0.405	1.7127e-35
18	Mip	3.48175	0.144	0.026	4.94994e-35
18	Dh31	2.12821	0.146	0.1	4.38406e-34
18	jeb	0.50175	0.797	0.616	6.49877e-31
18	HLH4C	0.837531	0.127	0.003	2.32983e-26
18	GstD1	0.531902	0.145	0.068	9.32686e-26
18	CG1572	0.618625	0.202	0.015	1.28443e-24
18	hth	0.509956	0.701	0.551	1.12558e-20
18	VGlut	0.586419	0.501	0.34	3.48983e-17
18	Fer1	0.542327	0.211	0.043	2.69314e-09
18	CG4250	0.796353	0.138	0.018	8.90928e-07
19	CG4328	0.740251	0.623	0.034	2.64081e-92
19	cpx	0.825085	0.986	0.921	1.67319e-80
19	Lmx1a	0.979625	0.681	0.031	2.87619e-66
19	DIP-alpha	0.792286	0.46	0.04	5.5535e-59
19	CG9328	0.504106	0.895	0.753	1.81818e-58
19	CR45312	0.59408	0.632	0.278	1.334e-56
19	scrt	0.501283	0.96	0.806	3.59032e-53
19	VGlut	1.50587	0.999	0.333	2.59608e-52
19	Sap47	0.622928	0.995	0.949	5.69239e-51
19	hbn	0.756261	0.559	0.047	1.72168e-41
19	CG10804	0.560889	0.825	0.447	6.71356e-41
19	Argk	0.505355	0.991	0.908	1.26197e-36
19	Eip93F	0.569081	0.526	0.336	7.52375e-36
19	Nplp1	0.885893	0.683	0.195	1.49676e-35
19	Pka-C3	0.544114	0.152	0.125	5.74344e-15
20	crb	0.72142	0.642	0.019	6.85133e-283
20	Pka-R2	1.38869	0.962	0.431	2.40242e-252
20	Mef2	0.843344	0.886	0.348	7.39911e-244
20	mub	1.17993	0.999	0.682	1.04622e-228
20	Cks85A	0.550613	0.548	0.111	2.57774e-197
20	Pka-C1	1.12168	0.999	0.722	6.24587e-195
20	CG5830	0.511647	0.611	0.206	5.27274e-178
20	CG11191	0.833652	0.811	0.241	1.70725e-163
20	Eip93F	1.13428	0.93	0.331	2.83606e-142
20	CG7378	0.558269	0.743	0.368	5.49289e-123
20	slo	0.550478	0.958	0.728	1.67257e-112
20	CG4502	0.592916	0.738	0.348	1.83144e-110
20	Tsp42En	0.501306	0.396	0.011	2.99588e-110
20	Rab27	0.789243	0.838	0.26	6.6343e-110
20	rut	0.53291	0.727	0.3	2.54278e-109
20	Rgk1	0.853518	0.867	0.201	1.44642e-101
20	fok	0.5825	0.902	0.531	3.427e-95
20	CG3625	0.624156	0.832	0.526	1.638e-88
20	Pkc53E	0.818595	0.985	0.647	1.94021e-88
20	Appl	0.579193	0.991	0.848	8.7544e-78
20	Dop1R2	0.742303	0.769	0.167	2.67459e-75
20	14-3-3zeta	0.797516	1	0.971	7.6059e-75
20	dysc	0.519638	0.996	0.875	4.27378e-74
20	fz	0.515349	0.721	0.262	5.36599e-67
20	5-HT1A	0.760955	0.904	0.374	1.82971e-65
20	jdp	1.05691	0.996	0.704	1.29945e-60
20	Rdl	0.534192	0.997	0.903	3.3031e-56
20	CG13739	0.814576	0.942	0.409	5.60665e-51
20	Bx	0.689613	0.82	0.243	3.05086e-46
20	Fas2	0.651188	0.879	0.342	1.54207e-43
20	CG32204	0.518718	0.561	0.168	8.50221e-43
20	prt	0.706946	0.621	0.048	5.98931e-41
20	CG45263	0.583926	0.974	0.6	2.12976e-38
20	Octbeta1R	0.60294	0.751	0.223	2.35844e-35
20	dati	0.620759	0.87	0.313	4.71619e-35
20	lbm	0.559147	0.365	0.013	6.18543e-35
20	Nep1	0.556267	0.575	0.054	1.1649e-29
20	rad	0.605256	0.984	0.511	2.84787e-27
20	sNPF	0.828849	0.943	0.195	3.06291e-09
21	Ets65A	0.687647	0.641	0.059	6.1798e-34
21	VGlut	1.25873	0.991	0.335	1.95606e-28
21	CG45781	0.659151	0.499	0.04	2.33283e-27
21	cpx	0.598945	0.997	0.921	1.28825e-24
21	mirr	0.578921	0.47	0.045	1.10121e-21
21	Nep2	0.568307	0.265	0.01	1.06042e-08
22	scro	0.6487	0.673	0.205	3.21268e-26
22	toy	0.532733	0.688	0.275	2.90731e-21
22	Hs3st-A	0.50482	0.84	0.565	8.70876e-08
22	klg	0.63124	0.679	0.539	0.00116644
23	CG18467	0.635662	0.677	0.311	4.48303e-49
23	otp	1.19242	0.775	0.022	1.12236e-40
23	CG2269	0.674657	0.958	0.755	4.93045e-38
23	vg	1.03523	0.761	0.021	1.64595e-35
23	CG42541	0.560968	0.658	0.552	9.44624e-31
23	IA-2	0.660596	0.995	0.885	7.63403e-23
24	Pdp1	0.840719	0.99	0.939	4.73125e-278
24	Pdf	3.95069	0.139	0.074	3.04049e-216
24	CG2269	1.49425	0.99	0.755	6.02962e-210
24	Hipk	0.789351	0.799	0.436	8.72014e-189
24	nmo	0.769751	0.943	0.819	1.30788e-181
24	fax	1.0003	0.972	0.668	3.37024e-169
24	CG13054	0.956719	0.47	0.041	3.31001e-168
24	Df31	0.914197	0.889	0.468	6.84571e-157
24	7B2	1.02544	0.995	0.841	1.8615e-153
24	bru3	1.30376	0.998	0.703	5.6962e-149
24	Pdfr	0.850336	0.455	0.139	1.35201e-138
24	CG13551	0.668646	0.741	0.389	2.52679e-135
24	cwo	0.507642	0.525	0.189	4.6183e-135
24	Mmp2	1.35539	0.686	0.404	2.87724e-134
24	cry	1.01099	0.306	0.034	1.25416e-127
24	pAbp	0.704616	0.946	0.845	7.26266e-127
24	amon	0.886213	0.845	0.478	1.14481e-124
24	RpS11	0.750787	0.977	0.889	1.97166e-123
24	RpL32	0.772115	0.944	0.842	3.53143e-121
24	RpL10Ab	0.767093	0.971	0.796	7.71512e-121
24	RpL18A	0.819182	0.974	0.862	1.41738e-118
24	Pdi	0.713181	0.545	0.268	4.16053e-118
24	RpLP1	0.778602	0.953	0.875	4.87767e-118
24	RpS13	0.842207	0.946	0.797	9.70048e-118
24	RpS15	0.796409	0.967	0.892	1.06197e-116
24	CG12384	0.567675	0.8	0.533	8.14259e-113
24	His4r	0.681717	0.99	0.956	6.32025e-109
24	RpS24	0.620367	0.913	0.808	1.48749e-108
24	RpL28	0.683844	0.964	0.914	2.86366e-108
24	RpL31	0.665759	0.974	0.909	7.9668e-107
24	RpS27	0.684187	0.977	0.907	1.5328e-106
24	eIF4A	0.544093	0.989	0.947	1.40046e-105
24	RpS20	0.750333	0.93	0.83	2.34456e-105
24	Rfx	0.542059	0.429	0.06	3.70833e-105
24	RpS19a	0.697514	0.871	0.661	1.89071e-103
24	smt3	0.573801	0.836	0.635	3.8994e-103
24	RpS3	0.691617	0.858	0.729	9.26103e-103
24	CG30172	0.657271	0.949	0.737	1.65254e-101
24	CR42862	0.531359	0.897	0.697	1.11642e-100
24	RpL13A	0.718878	0.925	0.82	6.32791e-100
24	RpLP2	0.751777	0.938	0.833	3.24537e-98
24	tsr	0.737969	0.728	0.346	3.57807e-98
24	RpS5a	0.700675	0.859	0.667	3.87787e-98
24	RpS10b	0.69912	0.936	0.817	1.13891e-96
24	RpL27	0.695748	0.92	0.751	6.93959e-96
24	RpS12	0.711093	0.943	0.826	7.56318e-94
24	Calr	0.695792	0.769	0.42	1.15647e-93
24	Rab2	0.538784	0.843	0.601	2.17769e-92
24	Phm	0.631913	0.705	0.379	2.77344e-92
24	RpL37A	0.691877	0.933	0.826	6.10433e-92
24	RpS9	0.666209	0.9	0.79	3.19967e-91
24	RpL35A	0.607788	0.923	0.787	5.81259e-91
24	RpS7	0.683549	0.966	0.893	2.41802e-90
24	svr	0.653344	0.7	0.444	1.10565e-89
24	RpL10	0.584191	0.956	0.897	1.43574e-89
24	RpL11	0.629467	0.902	0.717	2.34737e-89
24	RpS28b	0.631019	0.967	0.892	2.19224e-88
24	CG32052	0.724834	0.612	0.319	3.91166e-87
24	RpL40	0.57409	0.984	0.931	2.33571e-86
24	Pcd	0.666163	0.745	0.34	1.56378e-85
24	RpL39	0.775003	0.899	0.743	2.51213e-85
24	RpS25	0.539662	0.984	0.966	1.88602e-84
24	TMS1	0.516415	0.797	0.609	8.42068e-84
24	RpS16	0.678797	0.867	0.671	2.90866e-83
24	RpL9	0.591548	0.863	0.694	1.07704e-82
24	RpL36A	0.602649	0.921	0.781	7.27004e-82
24	RpL36	0.528759	0.964	0.926	9.95164e-82
24	RpL26	0.615223	0.921	0.843	1.43484e-81
24	RpL30	0.674834	0.83	0.598	5.71186e-81
24	chrb	0.53531	0.84	0.735	1.25663e-79
24	RpL4	0.581786	0.858	0.667	1.1789e-78
24	RpL6	0.604973	0.966	0.891	2.43556e-78
24	CG43324	0.609302	0.833	0.535	3.05921e-78
24	CG43222	0.72044	0.732	0.317	3.51803e-78
24	RpS18	0.579004	0.91	0.785	5.15392e-77
24	RpS23	0.603952	0.833	0.676	1.85814e-76
24	RpS4	0.585154	0.946	0.88	2.45332e-76
24	RpS15Aa	0.616938	0.902	0.745	9.35995e-76
24	RpL7	0.598992	0.954	0.896	1.42177e-75
24	RpS21	0.640747	0.874	0.742	2.92154e-75
24	RpL7A	0.597344	0.926	0.814	8.75953e-73
24	RpS17	0.578835	0.923	0.839	4.23416e-72
24	RpS3A	0.550327	0.954	0.888	4.33252e-72
24	CG42389	0.519988	0.777	0.536	5.2373e-71
24	cathD	0.605462	0.771	0.424	9.31412e-71
24	RpS14a	0.540646	0.93	0.826	2.62955e-70
24	CG6770	0.561404	0.961	0.869	5.02598e-70
24	RpL27A	0.555943	0.954	0.904	5.3687e-70
24	Sytbeta	0.664718	0.628	0.194	6.56771e-69
24	RpL19	0.596159	0.913	0.825	9.0449e-69
24	RpS14b	0.577478	0.825	0.646	1.01175e-67
24	RpS26	0.510982	0.967	0.899	1.82378e-67
24	RpS27A	0.590386	0.951	0.857	2.65632e-67
24	brat	0.511298	0.753	0.438	6.11138e-67
24	RpS8	0.570792	0.974	0.912	2.22385e-66
24	Eip63F-1	0.758385	0.655	0.287	3.6952e-66
24	IA-2	0.975103	0.995	0.885	4.56683e-66
24	RpL23A	0.5585	0.917	0.835	9.54479e-66
24	RpS29	0.606143	0.98	0.904	1.8508e-65
24	CG2852	0.607721	0.887	0.644	2.45856e-64
24	RpL37a	0.537177	0.992	0.959	2.50307e-64
24	RpL12	0.588943	0.928	0.822	8.80682e-63
24	Alk	0.550397	0.908	0.62	3.86663e-62
24	RpL3	0.571646	0.953	0.834	3.25007e-61
24	CG43658	0.614295	0.517	0.261	7.22969e-61
24	CG17777	1.78535	0.219	0.003	1.26392e-58
24	CG1275	0.658045	0.596	0.272	3.2075e-58
24	CG43902	0.80466	0.283	0.276	3.92646e-58
24	rad	0.853419	0.8	0.514	4.29293e-58
24	RpL14	0.50271	0.974	0.939	7.53749e-58
24	RpL23	0.529309	0.954	0.906	1.39348e-57
24	eEF1alpha2	0.52505	0.876	0.664	1.59199e-57
24	Rack1	0.536992	0.845	0.715	1.94034e-56
24	Tctp	0.513889	0.722	0.598	1.24093e-54
24	CtsB1	0.54681	0.696	0.367	1.25478e-54
24	eEF1beta	0.566027	0.668	0.396	1.71284e-52
24	awd	0.514927	0.799	0.582	3.23667e-50
24	RpL41	0.525145	0.872	0.751	1.0937e-49
24	Hsp23	0.541597	0.534	0.26	1.22498e-49
24	Hsc70-3	0.519482	0.678	0.36	1.67918e-49
24	eEF1alpha1	0.745562	0.741	0.442	3.36859e-49
24	Gpb5	0.651772	0.396	0.184	8.40613e-49
24	CG43737	0.512669	0.82	0.595	1.0868e-46
24	Tbh	0.554765	0.381	0.058	3.07379e-45
24	CG17716	0.546046	0.715	0.422	4.87335e-45
24	fru	0.726281	0.601	0.381	4.05614e-43
24	Ank2	0.515614	0.9	0.688	4.36229e-42
24	klg	0.626531	0.715	0.539	7.43681e-41
24	CG43759	0.537447	0.453	0.195	3.50606e-40
24	CG4577	0.992632	0.619	0.395	4.41836e-40
24	CG1648	0.625053	0.455	0.313	1.53836e-39
24	CG18467	0.508084	0.625	0.311	6.32554e-36
24	Dop2R	0.67396	0.861	0.723	1.06375e-30
24	Imp	0.868561	0.534	0.253	4.03139e-30
24	VGlut	1.16516	0.854	0.337	8.81131e-29
24	Nplp1	0.785125	0.56	0.198	1.76234e-27
24	CG18599	0.53468	0.247	0.009	5.63611e-27
24	bi	0.616869	0.632	0.219	9.14948e-25
24	AstC	2.84855	0.401	0.025	1.10751e-22
24	CG13408	0.554213	0.331	0.1	4.93477e-21
24	CG42394	0.578275	0.268	0.134	6.0135e-21
24	Dh44	0.683173	0.28	0.046	2.30801e-13
24	CG15537	1.14942	0.221	0.071	4.96094e-08
24	Proc	0.624308	0.226	0.13	0.000668626
24	Dh31	0.837461	0.155	0.1	0.0216227
25	ckn	0.853684	0.788	0.234	4.37879e-278
25	CG13685	0.964049	0.804	0.347	1.48306e-268
25	CG43078	1.04085	0.846	0.142	7.82176e-257
25	Slob	0.781811	0.8	0.256	6.56693e-204
25	Mmp2	1.64476	0.993	0.402	1.74694e-195
25	CG14853	0.74167	0.793	0.25	1.4783e-194
25	Epac	0.789782	0.736	0.178	3.78995e-169
25	Rbp6	1.05506	1	0.888	2.15853e-157
25	Nckx30C	0.892794	0.988	0.693	6.69501e-141
25	Rh7	1.67537	0.821	0.103	9.11678e-125
25	CG13937	0.686621	0.719	0.309	1.83941e-122
25	nrm	0.546035	0.678	0.238	1.63978e-107
25	Octbeta1R	1.18427	0.954	0.223	2.26112e-107
25	kek1	0.834109	0.982	0.611	5.67256e-106
25	rdgA	1.06541	0.979	0.428	3.34943e-101
25	CG32647	0.615975	0.862	0.422	4.01972e-98
25	CG31221	1.33237	1	0.724	1.02122e-94
25	kirre	0.684815	0.835	0.421	1.58164e-89
25	CG11221	0.625792	0.697	0.184	1.04276e-84
25	CG31324	0.58878	0.837	0.442	6.36653e-79
25	Con	0.832238	0.959	0.467	5.14134e-77
25	Pka-C3	1.70318	0.965	0.117	2.10336e-76
25	CG42541	1.03663	0.998	0.549	2.15483e-76
25	sosie	2.44794	0.998	0.033	1.96486e-72
25	sif	0.511947	0.959	0.706	4.73552e-72
25	Hs3st-A	0.62615	0.94	0.565	5.68888e-71
25	CG44422	0.703816	0.848	0.324	7.65366e-67
25	bsh	0.594217	0.522	0.011	6.72978e-65
25	CG9896	1.12784	0.802	0.113	1.4663e-64
25	Ace	0.620819	0.919	0.588	7.34103e-64
25	igl	0.586253	0.991	0.692	5.75302e-62
25	Cbp53E	0.969047	0.989	0.615	2.34264e-58
25	ct	0.579664	0.715	0.218	8.00245e-57
25	Sytalpha	0.53291	0.706	0.247	1.30546e-56
25	ChAT	0.663287	0.858	0.395	5.89287e-53
25	scro	0.734733	0.811	0.204	9.92252e-52
25	CG11000	0.591953	0.899	0.669	3.90881e-51
25	Cngl	0.613486	1	0.791	1.69869e-49
25	VAChT	0.721326	0.959	0.557	1.83537e-44
25	hth	0.824628	0.991	0.549	5.04158e-42
25	beat-IIa	0.615903	0.86	0.385	7.19164e-39
25	CG33639	0.513043	0.619	0.208	3.59995e-36
25	Aldh	0.545715	0.556	0.064	6.43035e-36
25	CG43902	0.561721	0.782	0.271	3.18523e-30
25	Tk	1.34835	0.958	0.081	9.57715e-11
25	CG2016	0.643101	0.857	0.13	0.022815
26	Pka-C1	1.62716	1	0.723	0
26	mub	1.21894	0.991	0.683	1.46088e-235
26	fok	0.871195	0.945	0.531	3.53445e-220
26	trio	0.80968	0.847	0.322	3.0535e-203
26	jdp	1.62409	1	0.705	1.61033e-195
26	14-3-3zeta	1.04143	1	0.971	3.05501e-182
26	mamo	1.69474	1	0.609	1.61501e-171
26	CG7646	0.860966	0.991	0.819	1.06637e-163
26	CG13739	1.4306	0.996	0.41	1.81545e-159
26	RhoGDI	0.703885	0.89	0.453	3.18612e-157
26	CG30158	0.79496	0.753	0.129	7.25625e-148
26	CG8641	1.35798	0.911	0.089	8.22805e-148
26	Dop1R2	1.12975	0.909	0.167	2.18797e-141
26	rut	0.627012	0.76	0.301	2.74078e-132
26	dlg1	0.670493	0.945	0.725	2.75825e-127
26	CG31191	0.557582	0.531	0.064	1.40436e-122
26	CG42322	0.527331	0.739	0.325	3.05248e-120
26	CG18812	0.561741	0.86	0.475	1.88599e-108
26	pum	0.691506	1	0.952	1.18969e-97
26	dysc	0.561143	0.996	0.876	8.29598e-97
26	ey	0.57138	0.533	0.044	1.00395e-87
26	Rgk1	0.818147	0.833	0.203	2.71512e-82
26	Pka-R2	0.776161	0.892	0.433	1.13351e-79
26	CG42817	0.586831	0.741	0.29	9.05367e-71
26	olf413	0.521857	0.735	0.285	2.81064e-65
26	cmpy	0.573447	0.782	0.359	9.61168e-61
26	dpr8	0.555745	0.936	0.535	1.68278e-56
26	Dop1R1	0.531383	0.666	0.228	1.41394e-54
26	Appl	0.539928	0.991	0.848	1.82512e-53
26	Pka-C3	1.26882	0.94	0.117	1.54262e-47
26	Cngl	0.63148	1	0.791	8.50199e-43
26	toy	0.636992	0.851	0.274	1.06706e-38
26	nAChRalpha6	0.58519	0.995	0.778	4.4245e-38
26	FK506-bp2	0.555154	0.893	0.627	1.18857e-36
26	CG31997	1.05612	0.826	0.099	2.61665e-36
26	igl	0.542072	0.959	0.693	3.39841e-30
26	prt	0.613029	0.536	0.05	1.67175e-28
26	Nep1	0.522845	0.542	0.055	2.87671e-21
26	DAT	0.712755	0.723	0.024	0.00406864
27	msi	0.868532	0.706	0.615	6.81268e-106
27	Fife	0.757765	0.847	0.477	2.76352e-59
27	5-HT1A	0.825759	0.585	0.379	7.11966e-59
27	CG15478	0.504824	0.393	0.047	7.92811e-56
27	shep	0.599561	0.998	0.959	7.04523e-50
27	dpr17	0.777703	0.3	0.266	2.06219e-49
27	CG10804	0.711782	0.816	0.449	5.90464e-46
27	CR45312	0.592453	0.579	0.28	1.51446e-41
27	beat-IV	0.525299	0.365	0.209	7.82549e-40
27	cpx	0.636341	0.996	0.921	8.62106e-37
27	VGlut	1.60593	0.996	0.336	1.50902e-36
27	CG11294	0.891673	0.613	0.038	1.72511e-28
27	svp	0.523497	0.341	0.049	8.02437e-28
27	Eip63F-1	0.51069	0.434	0.29	1.97321e-23
27	CG32017	0.629103	0.933	0.59	3.40598e-23
27	DIP-delta	0.63162	0.52	0.197	9.48181e-22
27	Rh7	0.594349	0.423	0.107	1.05873e-20
27	Octbeta1R	0.532578	0.503	0.227	2.00855e-20
27	CG42458	0.577516	0.408	0.084	1.5023e-18
27	Nplp1	0.713217	0.601	0.198	2.13495e-17
28	scyl	0.821196	0.842	0.519	3.58957e-66
28	CG34355	0.52628	0.739	0.28	5.83246e-24
28	Rh7	0.781191	0.313	0.108	6.16418e-23
28	Ets65A	0.708004	0.577	0.062	1.63931e-22
28	chrb	0.650061	0.863	0.735	4.19995e-13
28	Scp2	1.08821	0.61	0.278	0.000137332
29	beat-Ic	1.32109	0.894	0.35	2.46031e-101
29	beat-Ib	0.74935	0.78	0.321	3.4406e-62
29	CR45621	0.579092	0.492	0.03	5.44718e-36
29	beat-Ia	0.701949	0.622	0.181	2.21978e-33
29	jeb	0.76694	0.931	0.616	5.59214e-31
29	ChAT	0.649104	0.782	0.397	1.25599e-28
29	scro	0.525029	0.699	0.206	1.47947e-24
29	CG9650	0.564309	0.668	0.196	4.63017e-23
29	sr	0.544449	0.514	0.173	2.04079e-20
29	toy	0.507712	0.801	0.275	5.5627e-20
29	DIP-beta	0.528206	0.328	0.095	2.60203e-16
29	CG4577	0.653166	0.788	0.394	1.72014e-08
30	CG14509	1.61072	0.832	0.527	5.97316e-291
30	CG15628	1.30066	0.808	0.672	3.86297e-283
30	Dgp-1	0.858883	0.396	0.135	2.14975e-271
30	nAChRalpha5	1.13638	0.8	0.71	2.7845e-236
30	Syp	1.04659	0.828	0.749	1.10144e-205
30	Rdl	0.921608	0.934	0.904	3.6068e-202
30	Hk	0.874902	0.882	0.781	1.75029e-187
30	Cow	0.974152	0.614	0.426	3.16222e-185
30	nAChRalpha7	1.16116	0.768	0.628	2.26449e-176
30	para	0.885234	0.894	0.838	4.26823e-164
30	Shab	0.782707	0.618	0.339	2.03371e-160
30	CG32647	0.78182	0.612	0.425	9.15405e-146
30	tutl	0.663907	0.748	0.646	1.34287e-118
30	tipE	0.639118	0.492	0.313	8.59995e-111
30	Ih	0.607468	0.878	0.841	2.19404e-107
30	NaCP60E	0.549134	0.836	0.74	2.74604e-101
30	Ace	0.685717	0.696	0.59	1.61434e-95
30	alphaTub84B	0.701205	0.898	0.809	8.11153e-91
30	qvr	0.513355	0.904	0.855	3.95351e-86
30	ImpL3	1.46423	0.232	0.014	5.61476e-84
30	betaTub56D	0.858291	0.76	0.547	2.29977e-82
30	Xrp1	0.748208	0.624	0.291	4.38367e-82
30	CG33181	0.70067	0.868	0.572	3.17241e-79
30	futsch	0.670515	0.926	0.862	2.38327e-77
30	IscU	0.692109	0.928	0.858	6.60838e-74
30	CG3961	0.76549	0.49	0.156	1.17604e-73
30	RpS2	0.678127	0.964	0.906	7.86972e-73
30	CG5010	0.557233	0.816	0.653	2.34932e-66
30	CG8620	1.04379	0.36	0.039	1.74175e-64
30	pyd	0.738861	0.418	0.261	2.08675e-64
30	dpr1	0.805379	0.598	0.444	7.15357e-63
30	igl	0.507595	0.816	0.694	1.48118e-59
30	sta	0.793633	0.964	0.844	2.94235e-58
30	RpL35	0.564524	0.916	0.797	1.37026e-54
30	RpS21	0.562709	0.88	0.742	5.94858e-47
30	Ccn	0.547259	0.416	0.224	1.99738e-44
30	CG43729	0.594237	0.686	0.714	5.96773e-42
30	RpL30	0.521269	0.794	0.598	5.73691e-40
30	VAChT	0.542938	0.656	0.56	7.47101e-35
30	CG43902	0.677211	0.456	0.275	2.5519e-34
30	Drep3	0.82619	0.342	0.108	2.21259e-32
30	CG1648	0.624368	0.574	0.312	2.14747e-30
30	Msp300	0.529649	0.834	0.715	2.43812e-26
30	acj6	1.10238	0.58	0.095	5.92669e-26
30	Mmp2	0.572276	0.586	0.406	3.5522e-24
30	br	0.673753	0.306	0.145	1.90932e-21
30	kn	0.725536	0.418	0.034	3.23275e-21
30	hth	0.591636	0.586	0.553	6.31822e-19
30	CG31345	0.51805	0.32	0.132	3.4963e-16
30	CG10527	0.680589	0.322	0.145	3.94044e-14
31	Pkc53E	0.788635	0.978	0.649	4.5359e-77
31	Ca-alpha1T	0.757221	0.572	0.478	3.83632e-61
31	robo2	0.696557	0.354	0.101	9.95981e-50
31	CG43902	0.836186	0.808	0.272	8.17201e-45
31	Pka-R1	0.511301	0.818	0.468	1.97951e-40
31	heph	0.777501	0.923	0.582	3.90439e-35
31	Lim1	1.05025	0.945	0.189	1.00004e-31
31	Ets65A	0.697325	0.679	0.061	2.96603e-26
[truncated: 3,530 more rows]
