# Supplementary material for: A single-cell transcriptomic atlas of the adult Drosophila ventral nerve cord
Source: eLife. 2020 Apr 21;9:e54074. doi: 10.7554/eLife.54074 (PMC7173974; doi:10.7554/eLife.54074)
Supplement: Figure 4—source data 1. — Table showing the average log-fold change (>0.5) values of hemilineage-discriminative marker genes, including adjusted p-values (<0.05). pct.1 is the proportion of cells that express the gene within the predicated hemilineage, pct.2 is the proportion of cells that express the gene outside of the predicted hemilineage. [file elife-54074-fig4-data1.xlsx]

## Sheet: hemilineage markers
Lineage	gene	avg_logFC	pct.1	pct.2	p_val_adj
lin0A	fkh	1.44411	0.64	0.023	1.48479e-110
lin0A	mab-21	1.1862	0.665	0.119	5.35042e-39
lin0A	HLH3B	1.13985	0.453	0.011	5.56812e-163
lin0A	Dh31	0.882265	0.298	0.197	7.51328e-11
lin0A	Ubx	0.860111	0.621	0.291	9.92657e-27
lin0A	CG45781	0.852335	0.286	0.085	8.13923e-15
lin0A	CG4766	0.849519	0.513	0.106	4.07656e-25
lin0A	CG13739	0.824547	0.781	0.442	3.60572e-72
lin0A	CG44422	0.82422	0.584	0.348	3.24595e-39
lin0A	CG14989	0.798876	0.998	0.817	3.20274e-22
lin0A	MRE23	0.778939	0.323	0.008	3.49622e-214
lin0A	Gad1	0.747887	0.981	0.534	8.17048e-18
lin0A	DIP-beta	0.710441	0.375	0.092	3.97031e-33
lin0A	inv	0.67428	0.271	0.008	7.88478e-135
lin0A	comm	0.658466	0.387	0.109	1.94869e-58
lin0A	Lim1	0.634771	0.774	0.335	2.86291e-28
lin0A	nvy	0.613645	0.366	0.102	1.10316e-44
lin0A	eys	0.608105	0.725	0.412	1.66319e-38
lin0A	Ac78C	0.591769	0.219	0.041	1.83249e-19
lin0A	VGAT	0.585199	0.574	0.27	3.47616e-35
lin0A	CG42260	0.580998	0.81	0.649	2.22732e-88
lin0A	en	0.57879	0.232	0.008	2.07018e-96
lin0A	CG31997	0.559971	0.466	0.271	2.45251e-12
lin0A	CR45312	0.553944	0.482	0.238	1.9843e-19
lin0A	grn	0.54099	0.524	0.159	1.28679e-09
lin0A	NaCP60E	0.530827	0.919	0.8	5.24876e-75
lin0A	MYPT-75D	0.528015	0.578	0.319	1.21342e-28
lin0A	Nos	0.513001	0.186	0.055	2.82812e-07
lin0A	CG8861	0.500495	0.613	0.415	1.73971e-10
lin1A	Ets21C	1.7126	0.589	0.003	0
lin1A	mirr	1.32013	0.771	0.122	3.90844e-33
lin1A	SoxN	1.11304	0.461	0.071	7.00689e-22
lin1A	vvl	0.976982	0.815	0.308	2.97788e-29
lin1A	dpr13	0.904768	0.904	0.518	3.86939e-34
lin1A	Ptx1	0.834541	0.349	0.035	7.68236e-34
lin1A	PVRAP	0.790117	0.573	0.215	9.18645e-17
lin1A	CG30419	0.653893	0.307	0.092	4.61569e-19
lin1A	CG3655	0.628267	0.419	0.161	4.23778e-12
lin1A	VAChT	0.589744	0.643	0.315	3.99363e-10
lin1A	Dr	0.586669	0.258	0.036	4.51431e-20
lin1A	br	0.563571	0.32	0.159	0.00188921
lin1A	CR44978	0.55643	0.273	0.095	1.08476e-13
lin1A	ChAT	0.544756	0.445	0.19	3.89256e-12
lin1A	glob1	0.52451	0.18	0.057	1.9811e-11
lin1A	Hs3st-A	0.522652	0.763	0.474	4.29723e-17
lin1A	CG33639	0.513531	0.435	0.219	4.94033e-11
lin1B	HLH4C	1.63182	0.568	0.04	1.16031e-69
lin1B	H15	1.34332	0.42	0.035	3.89976e-101
lin1B	Hr51	1.32417	0.452	0.012	2.65736e-270
lin1B	CG14989	1.14301	0.997	0.816	1.75498e-30
lin1B	Lmpt	1.05379	0.414	0.121	1.08728e-30
lin1B	DIP-delta	0.916036	0.58	0.325	9.45479e-33
lin1B	CG13408	0.899942	0.232	0.062	1.93464e-08
lin1B	SPR	0.885423	0.367	0.215	1.35008e-12
lin1B	Gad1	0.811819	0.964	0.532	1.62995e-07
lin1B	mid	0.795233	0.261	0.031	5.45555e-74
lin1B	Bx	0.741473	0.543	0.285	8.25445e-16
lin1B	DIP-alpha	0.740915	0.208	0.056	2.02372e-10
lin1B	Ptx1	0.739746	0.247	0.034	5.38338e-39
lin1B	pyr	0.722365	0.237	0.051	1.06527e-26
lin1B	CG42541	0.644817	0.668	0.418	3.48543e-08
lin1B	Octbeta2R	0.557108	0.446	0.284	3.12433e-16
lin1B	sona	0.547782	0.179	0.066	4.27092e-14
lin1B	beat-VII	0.542971	0.387	0.238	3.67251e-07
lin1B	CR44978	0.521701	0.249	0.094	2.8298e-15
lin1B	Con	0.516713	0.555	0.381	1.92489e-05
lin1B	Antp	0.501585	0.824	0.549	0.0137584
lin4B	fkh	1.56485	0.622	0.019	7.79424e-240
lin4B	HLH4C	1.22009	0.51	0.04	1.6971e-49
lin4B	AstA	1.04184	0.139	0.065	0.00272871
lin4B	CG31221	0.993527	0.875	0.662	9.93544e-37
lin4B	tey	0.981916	0.371	0.049	4.06997e-46
lin4B	VAChT	0.922864	0.757	0.308	2.45409e-48
lin4B	oc	0.856125	0.287	0.007	5.55297e-272
lin4B	Hs3st-A	0.762891	0.779	0.47	9.16759e-69
lin4B	Dh31	0.726439	0.264	0.197	0.0378468
lin4B	ap	0.713911	0.246	0.002	1.65715e-228
lin4B	nvy	0.705622	0.361	0.1	6.51807e-63
lin4B	Wnt4	0.677987	0.277	0.071	2.5625e-05
lin4B	CG42458	0.676014	0.309	0.093	3.77924e-13
lin4B	MRE23	0.660393	0.222	0.009	4.34306e-129
lin4B	CG14762	0.657988	0.559	0.302	1.69773e-30
lin4B	sNPF	0.627302	0.223	0.106	0.00169033
lin4B	Rbp9	0.60097	0.711	0.48	4.27012e-28
lin4B	CG34354	0.596128	0.534	0.312	3.24114e-20
lin4B	CG17193	0.559625	0.192	0.06	3.02149e-13
lin4B	CanA-14F	0.542904	0.725	0.521	9.64147e-17
lin4B	CG43759	0.528421	0.413	0.231	1.92126e-22
lin4B	trv	0.525849	0.903	0.709	4.05617e-24
lin4B	kirre	0.52083	0.726	0.494	4.98608e-22
lin5B & 6B	vg	1.44867	0.598	0.03	1.02395e-244
lin5B & 6B	AstA	1.31852	0.118	0.064	2.93754e-48
lin5B & 6B	CR45141	1.04184	0.455	0.019	0
lin5B & 6B	CG14989	0.903651	1	0.812	9.90019e-69
lin5B & 6B	Gad1	0.88884	0.979	0.522	6.06568e-60
lin5B & 6B	DIP-beta	0.834807	0.436	0.082	2.09017e-106
lin5B & 6B	salr	0.832067	0.467	0.12	2.27851e-63
lin5B & 6B	lbl	0.827683	0.255	0.002	6.90554e-288
lin5B & 6B	FMRFa	0.813284	0.183	0.127	7.20819e-19
lin5B & 6B	CG8861	0.727254	0.672	0.407	1.15874e-43
lin5B & 6B	CG32354	0.725113	0.174	0.02	2.4021e-77
lin5B & 6B	CG4328	0.680119	0.268	0.047	1.45589e-62
lin5B & 6B	toy	0.609369	0.336	0.099	3.4128e-41
lin5B & 6B	CG32017	0.576412	0.879	0.641	5.74486e-81
lin5B & 6B	salm	0.511356	0.24	0.061	4.31557e-49
lin6A	mab-21	1.19026	0.633	0.112	2.8836e-57
lin6A	toy	1.15446	0.633	0.091	2.3929e-99
lin6A	CG4766	1.06731	0.561	0.098	3.6481e-70
lin6A	CG14989	0.9721	0.995	0.814	1.30499e-43
lin6A	mirr	0.888789	0.479	0.119	4.7982e-39
lin6A	salr	0.863595	0.513	0.122	3.35797e-42
lin6A	caup	0.767966	0.397	0.104	1.79121e-24
lin6A	CG45781	0.738823	0.285	0.082	1.41592e-22
lin6A	Gad1	0.642624	0.953	0.528	2.88729e-12
lin6A	CG12594	0.534617	0.322	0.182	3.06519e-14
lin6A	ara	0.523505	0.279	0.079	3.77581e-17
lin6A	CG30419	0.500432	0.254	0.09	5.1252e-27
lin8A & 24B	VGlut	1.64731	0.996	0.327	7.32499e-45
lin8A & 24B	toy	1.40096	0.696	0.094	1.42202e-92
lin8A & 24B	E5	1.15818	0.378	0.004	0
lin8A & 24B	Ets65A	0.891867	0.437	0.07	1.84342e-49
lin8A & 24B	CG34355	0.849892	0.378	0.066	3.34437e-65
lin8A & 24B	ey	0.749021	0.251	0.016	5.17818e-97
lin8A & 24B	kek3	0.735712	0.527	0.262	6.83638e-35
lin8A & 24B	CG42313	0.681633	0.674	0.375	2.51834e-30
lin8A & 24B	CG17716	0.645075	0.704	0.462	1.77285e-29
lin8A & 24B	Nplp1	0.585789	0.675	0.413	0.00300185
lin8A & 24B	ems	0.58422	0.185	0.002	1.00884e-175
lin8A & 24B	Antp	0.571352	0.65	0.553	1.05332e-15
lin8B	C15	1.32988	0.459	0.004	0
lin8B	acj6	1.28134	0.458	0.055	1.85053e-53
lin8B	mab-21	1.23717	0.652	0.107	4.06283e-110
lin8B	CG4766	1.15438	0.616	0.092	4.44353e-127
lin8B	DIP-eta	0.972936	0.257	0.074	4.60545e-33
lin8B	Lim3	0.945493	0.425	0.054	1.47935e-142
lin8B	PHDP	0.888806	0.322	0.016	4.24292e-173
lin8B	spab	0.799831	0.329	0.145	4.80432e-35
lin8B	jdp	0.723499	0.504	0.356	9.8078e-73
lin8B	Drep3	0.718454	0.191	0.083	9.75906e-46
lin8B	mbl	0.698034	0.939	0.798	4.93908e-66
lin8B	CG34367	0.662453	0.236	0.017	7.7021e-113
lin8B	mamo	0.657982	0.618	0.47	5.22497e-32
lin8B	CG31221	0.629402	0.838	0.66	6.66115e-59
lin8B	cpo	0.604563	0.909	0.759	2.53842e-170
lin8B	CR45312	0.604429	0.409	0.235	1.33279e-86
lin8B	CG3655	0.551705	0.299	0.159	1.19394e-49
lin8B	CG32683	0.548464	0.382	0.168	9.17281e-48
lin8B	Abd-B	0.517673	0.137	0.062	0.0292369
lin8B	heph	0.501117	0.472	0.336	8.32038e-44
lin9A	pb	1.593	0.402	0.035	4.66958e-50
lin9A	CG14989	1.28977	0.997	0.814	4.13892e-93
lin9A	grn	1.21579	0.676	0.147	2.00629e-99
lin9A	Bx	1.11882	0.769	0.274	4.25156e-148
lin9A	CG45781	0.992158	0.362	0.078	7.35433e-43
lin9A	Gad1	0.98559	0.982	0.527	2.84262e-54
lin9A	Ets65A	0.948837	0.46	0.065	3.1258e-115
lin9A	Lim1	0.67023	0.762	0.328	3.21398e-46
lin9A	CG1402	0.637751	0.296	0.118	1.06274e-20
lin9A	CG8861	0.609465	0.638	0.41	4.75224e-25
lin9A	Pvf3	0.597311	0.851	0.557	8.7594e-34
lin9A	Dr	0.588693	0.257	0.031	2.48251e-70
lin9A	elB	0.582479	0.628	0.393	4.98855e-58
lin9A	CG32017	0.547464	0.88	0.644	5.18491e-32
lin9A	Gfrl	0.547226	0.498	0.337	2.21383e-55
lin9A	beat-VII	0.542245	0.422	0.235	2.12664e-30
lin9A	VGAT	0.53468	0.545	0.266	6.93749e-54
lin9A	aop	0.507471	0.471	0.308	1.68498e-96
lin9B	Dh31	1.95486	0.694	0.195	7.25641e-12
lin9B	sens-2	1.94928	0.79	0.029	1.74099e-25
lin9B	sNPF	1.9056	0.489	0.106	3.9572e-05
lin9B	VGlut	1.73844	0.995	0.339	2.46174e-23
lin9B	acj6	1.57895	0.735	0.066	4.72074e-08
lin9B	Nplp1	1.53373	0.904	0.416	3.27712e-34
lin9B	HLH4C	1.5022	0.63	0.048	6.04932e-16
lin9B	Drgx	1.39931	0.525	0.015	2.75811e-47
lin9B	svp	1.27712	0.612	0.058	1.12979e-22
lin9B	rad	1.21076	0.895	0.363	3.83682e-22
lin9B	PHDP	1.15669	0.516	0.025	2.8306e-18
lin9B	Lim3	1.08612	0.543	0.065	1.69063e-22
lin9B	CG32017	0.983304	0.959	0.65	1.13348e-29
lin9B	jdp	0.942056	0.557	0.36	1.80169e-17
lin9B	CG13739	0.891912	0.877	0.446	5.29864e-27
lin9B	tup	0.851512	0.361	0.022	5.30493e-20
lin9B	CG32700	0.792561	0.53	0.185	5.31891e-12
lin9B	DIP-beta	0.781532	0.402	0.095	2.53107e-07
lin9B	CG34355	0.772246	0.393	0.071	4.13994e-23
lin9B	CG42339	0.742581	0.388	0.102	8.22503e-19
lin9B	5-HT1A	0.742518	0.699	0.321	2.12489e-19
lin9B	hdc	0.707876	0.89	0.662	2.51499e-16
lin9B	Fife	0.705953	0.571	0.247	2.97793e-20
lin9B	kn	0.662154	0.292	0.064	0.0111263
lin9B	CG32698	0.633461	0.365	0.138	1.8727e-06
lin9B	CG42541	0.544221	0.712	0.422	1.75628e-06
lin9B	Octbeta2R	0.534331	0.507	0.286	6.76924e-13
lin9B	l(3)02640	0.5247	0.493	0.249	2.33914e-12
lin9B	CG1688	0.513308	0.338	0.122	0.00161633
lin9B	NPFR	0.508299	0.196	0.023	5.14382e-20
lin9B	glob1	0.503041	0.256	0.057	2.01626e-13
lin10B	caup	1.87919	0.795	0.099	2.48015e-87
lin10B	ara	1.62076	0.69	0.073	1.45996e-112
lin10B	kn	1.55274	0.55	0.055	4.84095e-27
lin10B	CG43902	1.35689	0.447	0.186	1.30628e-70
lin10B	Lim3	1.13448	0.461	0.06	2.4319e-52
lin10B	sens-2	1.00208	0.317	0.029	1.11815e-16
lin10B	eys	0.981752	0.705	0.411	1.91841e-41
lin10B	CG15765	0.924345	0.68	0.427	1.88219e-44
lin10B	CR32111	0.920972	0.332	0.032	1.93822e-111
lin10B	CG31221	0.851672	0.846	0.663	1.99781e-10
lin10B	LpR1	0.808271	0.555	0.287	6.1652e-29
lin10B	igl	0.804031	0.801	0.675	1.00849e-34
lin10B	CG6154	0.788686	0.344	0.145	7.6195e-23
lin10B	CG12163	0.762285	0.515	0.278	2.3961e-36
lin10B	exex	0.749444	0.207	0.014	1.00302e-45
lin10B	GluRIB	0.66379	0.514	0.464	6.75164e-13
lin10B	zld	0.642924	0.452	0.315	1.29014e-10
lin10B	CG43729	0.620142	0.678	0.592	1.12687e-11
lin10B	CG42817	0.600689	0.284	0.132	1.20343e-20
lin10B	CG10947	0.599305	0.221	0.065	7.65146e-22
lin10B	CG11317	0.530179	0.402	0.235	0.00958005
lin10B	mub	0.522345	0.497	0.356	7.9798e-08
lin10B	ChAT	0.522066	0.361	0.19	4.17608e-05
lin10B	Mmp2	0.504094	0.396	0.221	0.000560583
lin10B	sog	0.503729	0.116	0.022	0.00298552
lin11B	HLH4C	1.52815	0.59	0.047	4.51359e-19
lin11B	caup	1.48015	0.742	0.108	4.75921e-20
lin11B	eve	1.22344	0.41	0.004	9.40137e-57
lin11B	ara	1.21226	0.568	0.081	4.31393e-21
lin11B	Hr51	1.18048	0.48	0.018	7.93461e-28
lin11B	CG14989	0.887161	1	0.819	4.345e-06
lin11B	CR32111	0.808195	0.292	0.036	1.98749e-29
lin11B	Gad1	0.778783	0.963	0.539	0.00805959
lin11B	RapGAP1	0.61993	0.609	0.41	3.66531e-06
lin11B	AstC-R2	0.6061	0.269	0.107	0.0352569
lin11B	NLaz	0.576635	0.332	0.186	0.0136455
lin11B	CG15765	0.543195	0.661	0.43	0.0307511
lin11B	CG42238	0.529258	0.362	0.268	8.62687e-06
lin11B	CCKLR-17D3	0.524344	0.21	0.052	6.23175e-08
lin11B	Dat	0.504624	0.387	0.181	1.29137e-06
lin12B	CCHa2	2.71324	0.155	0.026	3.80314e-19
lin12B	AstC	2.209	0.14	0.02	1.03426e-18
lin12B	CG15537	1.51367	0.198	0.053	6.64926e-14
lin12B	pb	1.31803	0.39	0.037	1.67476e-24
lin12B	CG9896	1.0825	0.45	0.075	3.8622e-55
lin12B	Fer3	1.00315	0.361	0.015	0
lin12B	Gad1	0.993703	0.98	0.528	6.55728e-39
lin12B	CG34155	0.956542	0.422	0.12	2.69841e-42
lin12B	CG14989	0.844736	1	0.814	4.72717e-28
lin12B	H15	0.754593	0.303	0.036	5.15619e-55
lin12B	CR43716	0.670688	0.113	0.002	1.26171e-22
lin12B	sr	0.655198	0.339	0.155	4.00712e-22
lin12B	sNPF	0.59538	0.196	0.107	0.00346661
lin12B	trh	0.593214	0.207	0.017	1.63367e-80
lin12B	CG32052	0.590185	0.639	0.332	7.73765e-31
lin12B	Hasp	0.576924	0.946	0.871	3.38537e-63
lin12B	tey	0.561798	0.244	0.051	1.25125e-24
lin12B	DIP-alpha	0.557028	0.216	0.055	1.19031e-08
lin12B	CG32017	0.545296	0.858	0.645	8.3272e-30
lin12B	CG4328	0.542788	0.237	0.051	1.38303e-22
lin12B	dpr17	0.526355	0.476	0.29	1.8681e-12
lin13A & 19A	Fer2	1.39556	0.522	0.005	0
lin13A & 19A	Gad1	1.32944	0.986	0.515	4.86968e-188
lin13A & 19A	scro	1.19892	0.285	0.004	0
lin13A & 19A	Sp1	1.15285	0.311	0.041	9.99141e-46
lin13A & 19A	CG14989	1.11421	0.999	0.809	7.75554e-141
lin13A & 19A	CG45781	0.870049	0.33	0.073	1.18582e-83
lin13A & 19A	Scp2	0.751656	0.626	0.519	1.02691e-67
lin13A & 19A	Dbx	0.715089	0.239	0.009	7.98473e-287
lin13A & 19A	msi	0.705359	0.918	0.74	3.32154e-215
lin13A & 19A	CG42458	0.68319	0.291	0.087	2.74865e-54
lin13A & 19A	caup	0.678307	0.339	0.1	5.21436e-53
lin13A & 19A	mirr	0.66471	0.383	0.116	4.58515e-46
lin13A & 19A	ara	0.599461	0.28	0.074	1.7389e-67
lin13A & 19A	Eip63F-1	0.596641	0.605	0.37	2.00311e-61
lin13A & 19A	CG32225	0.578845	0.556	0.275	8.37943e-135
lin13A & 19A	CG16833	0.576474	0.466	0.193	4.46435e-156
lin13A & 19A	CG10804	0.567822	0.867	0.574	2.38784e-109
lin13A & 19A	VGAT	0.564499	0.562	0.258	4.09631e-131
lin13A & 19A	trn	0.559296	0.331	0.164	2.87783e-37
lin13A & 19A	CG1607	0.542714	0.517	0.276	3.24518e-128
lin13A & 19A	SPR	0.538341	0.288	0.214	1.1165e-26
lin13A & 19A	CG8861	0.537603	0.622	0.406	7.49428e-53
lin13A & 19A	CG9328	0.535944	0.865	0.724	1.46455e-208
lin13A & 19A	cpx	0.532306	0.996	0.964	1.78934e-167
lin13A & 19A	Dscam2	0.524274	0.869	0.723	3.16512e-152
lin13A & 19A	PVRAP	0.505791	0.359	0.212	3.12015e-46
lin13B	beat-Ia	1.68842	0.69	0.27	7.53672e-168
lin13B	vg	1.38474	0.567	0.042	1.15618e-56
lin13B	D	1.36444	0.494	0.005	0
lin13B	tey	1.10411	0.474	0.047	4.90569e-74
lin13B	Gad1	1.07809	0.974	0.532	1.10913e-42
lin13B	CR45141	1.01313	0.427	0.029	1.0788e-145
lin13B	CG14989	0.938988	0.996	0.816	1.01464e-37
lin13B	CG42674	0.889094	0.763	0.334	5.2021e-61
lin13B	CG17839	0.881757	0.606	0.252	2.28767e-56
lin13B	Sox21b	0.848087	0.315	0.002	3.19552e-291
lin13B	svp	0.847746	0.391	0.054	2.69903e-44
lin13B	dpr10	0.835416	0.542	0.211	1.99316e-87
lin13B	Eip63F-1	0.823721	0.526	0.38	1.44998e-43
lin13B	SoxN	0.812165	0.407	0.068	1.07048e-38
lin13B	beat-Ic	0.683934	0.688	0.402	6.43694e-35
lin13B	Cngl	0.645886	0.983	0.882	2.27764e-68
lin13B	CG32225	0.620789	0.574	0.284	1.61192e-51
lin13B	VGAT	0.613907	0.587	0.268	5.02962e-52
lin13B	CG18599	0.5913	0.185	0.002	8.67837e-183
lin13B	dpr1	0.569988	0.715	0.454	4.27286e-27
lin13B	cpx	0.55435	1	0.965	6.51165e-60
lin13B	CG7582	0.549218	0.645	0.388	1.19592e-62
lin13B	CG31814	0.544306	0.283	0.141	1.68044e-18
lin13B	GluRIB	0.531784	0.719	0.459	1.06668e-34
lin13B	Gyc88E	0.519027	0.161	0.059	1.90337e-18
lin13B	Tina-1	0.509527	0.667	0.455	9.5283e-52
lin14A	VGlut	1.6232	0.998	0.324	6.15844e-47
lin14A	CG15537	1.51518	0.235	0.052	1.25229e-10
lin14A	toy	1.4066	0.683	0.091	7.17796e-102
lin14A	Dr	0.990105	0.325	0.03	1.67249e-132
lin14A	Ets65A	0.946377	0.423	0.068	3.9101e-61
lin14A	Lim1	0.83108	0.773	0.33	6.53165e-36
lin14A	CG32698	0.80058	0.364	0.132	1.62479e-34
lin14A	grn	0.790116	0.541	0.154	5.937e-20
lin14A	PVRAP	0.697483	0.465	0.213	8.80614e-19
lin14A	CG34355	0.678695	0.314	0.066	1.45211e-52
lin14A	Drep3	0.676838	0.218	0.083	2.39697e-08
lin14A	CG31814	0.595359	0.305	0.139	1.48711e-12
lin14A	NLaz	0.579231	0.352	0.182	1.20296e-09
lin14A	CG3655	0.578996	0.283	0.161	1.78625e-23
lin14A	DIP-theta	0.577257	0.264	0.126	7.57464e-08
lin14A	Corin	0.565741	0.467	0.281	3.88254e-29
lin14A	CG32017	0.540983	0.884	0.645	9.02449e-13
lin14A	zfh2	0.528024	0.242	0.072	3.05178e-20
lin14A	CG11319	0.522399	0.414	0.274	8.01232e-17
lin14A	Pvf3	0.508243	0.825	0.559	1.72613e-05
lin14A	msi	0.501223	0.802	0.749	2.1511e-17
lin15B	twit	2.99088	0.947	0.081	0
lin15B	Proc	2.64794	0.972	0.345	0
lin15B	CG42394	2.37842	0.799	0.15	1.98204e-262
lin15B	rhea	2.37152	0.98	0.151	0
lin15B	CG14274	2.14054	0.772	0.073	2.00387e-236
lin15B	AnxB9	1.71435	0.704	0.059	0
lin15B	nolo	1.65119	0.839	0.177	0
lin15B	Fas2	1.58607	0.914	0.387	6.33889e-276
lin15B	mbl	1.58507	1	0.799	0
lin15B	CR31781	1.55301	0.279	0.072	6.46584e-31
lin15B	CG10527	1.49964	0.64	0.28	2.70569e-213
lin15B	CG1402	1.42424	0.824	0.107	2.23975e-129
lin15B	SP1173	1.26607	0.598	0.02	0
lin15B	lbm	1.18572	0.431	0.022	7.3341e-116
lin15B	CG1648	1.1627	0.58	0.234	1.7975e-226
lin15B	cv-2	1.15155	0.44	0.039	2.80862e-236
lin15B	CG13506	1.13876	0.777	0.198	0
lin15B	foxo	1.07594	0.421	0.011	7.18006e-301
lin15B	dally	1.06251	0.908	0.406	1.86165e-273
lin15B	Tsp42Ef	1.0582	0.487	0.029	0
lin15B	nord	1.05547	0.454	0.073	2.09235e-216
lin15B	CG31345	0.953604	0.693	0.226	1.30285e-83
lin15B	Xrp1	0.943367	0.846	0.304	5.1497e-276
lin15B	CR45223	0.916968	0.345	0.049	6.05578e-28
lin15B	mamo	0.902138	0.894	0.466	4.13827e-53
lin15B	CG1572	0.889992	0.354	0.023	3.6205e-37
lin15B	ringer	0.880051	0.861	0.487	0
lin15B	Atf3	0.837586	0.622	0.128	2.33562e-220
lin15B	Trx-2	0.828751	0.894	0.519	0
lin15B	CG33543	0.827301	0.775	0.269	1.44216e-183
lin15B	stai	0.808774	0.998	0.904	0
lin15B	Msp300	0.808187	0.953	0.753	3.4538e-230
lin15B	pix	0.805132	0.78	0.356	8.81335e-298
lin15B	CG11768	0.785605	0.643	0.181	3.03874e-172
lin15B	Ank2	0.7853	0.927	0.604	0
lin15B	CG43737	0.780953	0.941	0.618	2.42856e-277
lin15B	CG17816	0.765988	0.9	0.529	0
lin15B	CG14509	0.753998	0.849	0.536	4.74172e-175
lin15B	Imp	0.750506	0.793	0.312	1.7284e-41
lin15B	Nrg	0.738899	0.827	0.431	8.59824e-303
lin15B	beat-IIa	0.725092	0.693	0.451	1.75013e-137
lin15B	bi	0.705583	0.388	0.091	3.59056e-21
lin15B	vn	0.693084	0.323	0.013	1.09439e-254
lin15B	CG15628	0.686402	0.958	0.789	1.52614e-148
lin15B	CG3556	0.684753	0.828	0.441	2.24234e-255
lin15B	CG9705	0.680801	0.496	0.162	1.54496e-160
lin15B	Aldh	0.679699	0.158	0.028	7.65839e-29
lin15B	CG8407	0.678245	0.384	0.033	1.49199e-299
lin15B	ab	0.672356	0.758	0.389	8.79396e-90
lin15B	nAChRalpha7	0.669922	0.83	0.689	9.94791e-135
lin15B	Eip63F-1	0.668167	0.807	0.373	5.73142e-70
lin15B	wry	0.663283	0.824	0.514	4.84286e-161
lin15B	Tsp42Ee	0.659649	0.618	0.238	2.2712e-233
lin15B	Frq1	0.652422	0.963	0.835	8.30066e-262
lin15B	pHCl-1	0.649946	0.691	0.309	1.37948e-151
lin15B	beat-VI	0.643706	0.577	0.243	1.54577e-115
lin15B	GlcAT-P	0.61773	0.725	0.327	1.7236e-178
lin15B	pyd	0.61626	0.521	0.252	4.02611e-81
lin15B	Nmda1	0.612037	0.81	0.476	1.77897e-262
lin15B	CG42817	0.611996	0.527	0.126	7.31462e-165
lin15B	CG1943	0.601953	0.583	0.207	1.15198e-206
lin15B	eEF2	0.597746	0.899	0.677	1.52694e-269
lin15B	CG42392	0.596775	0.919	0.635	1.6101e-209
lin15B	AnxB10	0.596617	0.521	0.352	2.63507e-205
lin15B	FMRFaR	0.596256	0.499	0.145	1.77135e-58
lin15B	CG8331	0.595681	0.75	0.348	4.04931e-235
lin15B	CG14207	0.593855	0.711	0.37	4.99583e-297
lin15B	Chmp1	0.593258	0.76	0.373	7.07458e-285
lin15B	CalpA	0.58561	0.591	0.214	4.84767e-220
lin15B	RapGAP1	0.581007	0.738	0.404	2.00914e-120
lin15B	Cbp53E	0.574289	0.874	0.722	2.96519e-62
lin15B	Dad	0.572727	0.459	0.097	9.66751e-229
lin15B	Appl	0.570051	0.952	0.749	3.1639e-295
lin15B	Cad87A	0.567605	0.462	0.098	3.03319e-119
lin15B	uzip	0.564895	0.646	0.231	1.82516e-224
lin15B	ATP8B	0.564223	0.435	0.08	7.31537e-167
lin15B	CG8026	0.562239	0.686	0.317	3.96448e-269
lin15B	Myo81F	0.56152	0.282	0.086	5.79937e-50
lin15B	CG11191	0.561111	0.585	0.274	1.78628e-149
lin15B	capu	0.558894	0.75	0.39	1.05755e-176
lin15B	CG10098	0.557048	0.727	0.378	5.0923e-226
lin15B	CG3014	0.555999	0.324	0.008	0
lin15B	CG18549	0.553622	0.618	0.287	1.25013e-219
lin15B	Atpalpha	0.552319	0.998	0.989	0
lin15B	para	0.551624	0.98	0.899	2.02804e-206
lin15B	Con	0.550592	0.63	0.38	5.60529e-89
lin15B	CG14086	0.543581	0.228	0.006	4.55396e-229
lin15B	eag	0.530985	0.71	0.343	1.2576e-162
lin15B	betaTub56D	0.5287	0.883	0.697	1.32681e-191
lin15B	PHGPx	0.526505	0.774	0.427	5.22368e-202
lin15B	Cow	0.520835	0.828	0.477	1.16447e-203
lin15B	TyrRS	0.519097	0.49	0.146	1.00267e-175
lin15B	CG7781	0.518833	0.927	0.73	0
lin15B	CG43689	0.518065	0.312	0.067	6.54423e-15
lin15B	Vkor	0.517023	0.193	0.017	5.07166e-18
lin15B	AMPdeam	0.516803	0.808	0.461	3.48306e-221
lin15B	CG32944	0.514781	0.454	0.101	3.50457e-219
lin15B	CG9947	0.50755	0.576	0.221	1.09081e-225
lin15B	unc-104	0.506397	0.945	0.677	1.19319e-177
lin16B	Sp1	2.32957	0.893	0.034	1.38675e-59
lin16B	bi	2.16653	0.918	0.075	1.29562e-85
lin16B	VGlut	1.90136	0.983	0.327	5.90015e-71
lin16B	caup	1.22472	0.649	0.1	2.07088e-45
lin16B	svp	1.08884	0.454	0.051	1.72924e-72
lin16B	ara	0.981222	0.449	0.076	8.29862e-47
lin16B	salr	0.812014	0.511	0.126	1.90145e-26
lin16B	Lim3	0.809784	0.368	0.061	4.87637e-41
lin16B	CG34355	0.669501	0.317	0.067	3.49411e-42
lin16B	vvl	0.620916	0.711	0.304	1.15147e-15
lin16B	CG1358	0.607462	0.317	0.181	1.7151e-40
lin16B	exex	0.56931	0.204	0.013	2.49354e-64
lin16B	mirr	0.549051	0.319	0.126	4.80716e-10
lin16B	CR32111	0.501345	0.189	0.034	6.13661e-44
lin20A & 22A	bi	1.89962	0.772	0.067	2.60724e-81
lin20A & 22A	sNPF	1.32244	0.231	0.104	3.33408e-13
lin20A & 22A	sv	1.13577	0.355	0.02	1.16477e-233
lin20A & 22A	Ets65A	1.07466	0.435	0.063	1.88032e-123
lin20A & 22A	SoxN	0.908087	0.342	0.064	1.2362e-51
lin20A & 22A	vvl	0.838369	0.71	0.297	3.61979e-29
lin20A & 22A	VAChT	0.703935	0.635	0.305	3.67719e-39
lin20A & 22A	side	0.682798	0.764	0.505	4.13268e-40
lin20A & 22A	ChAT	0.671364	0.429	0.182	3.54423e-48
lin20A & 22A	CG31221	0.620047	0.928	0.655	3.36377e-12
lin20A & 22A	DIP-beta	0.566225	0.234	0.091	1.86918e-13
lin20A & 22A	Nlg3	0.524933	0.768	0.639	8.82363e-26
lin20A & 22A	CG7708	0.523564	0.325	0.148	2.58626e-30
lin20A & 22A	CG14762	0.50449	0.517	0.299	9.8652e-22
lin21A	VGlut	1.7747	0.981	0.33	4.04524e-65
lin21A	CG34355	0.71416	0.357	0.067	1.58371e-54
lin21A	Bx	0.708811	0.649	0.283	7.28178e-39
lin21A	CG42313	0.705955	0.596	0.378	8.73236e-35
lin21A	ey	0.676979	0.269	0.017	3.13839e-100
lin21A	CG17716	0.648163	0.729	0.462	6.91826e-44
lin21A	CG13287	0.604414	0.199	0.013	5.53764e-58
lin21A	tj	0.571566	0.186	0.009	2.29063e-66
lin21A	CG12994	0.562171	0.338	0.145	4.93853e-25
lin21A	CG10804	0.516358	0.833	0.586	7.80776e-33
lin23B	acj6	2.31666	0.938	0.045	5.58247e-107
lin23B	otp	1.42917	0.492	0.032	2.59609e-83
lin23B	sNPF	1.37134	0.418	0.1	6.94391e-19
lin23B	Drep3	1.31836	0.426	0.077	5.45462e-61
lin23B	Sytbeta	1.31423	0.644	0.177	1.24283e-119
lin23B	rdgA	1.30981	0.704	0.259	1.39038e-54
lin23B	slou	1.25225	0.394	0.01	0
lin23B	Antp	1.18116	0.916	0.545	3.76968e-76
lin23B	CG42458	1.17369	0.425	0.089	4.6554e-48
lin23B	heph	1.11397	0.839	0.327	1.24946e-43
lin23B	CG34351	1.05136	0.344	0.156	6.27629e-66
lin23B	Pvf3	1.03757	0.892	0.557	5.07976e-82
lin23B	spab	1.02857	0.438	0.144	2.58682e-16
lin23B	kn	1.02791	0.29	0.059	3.70475e-21
lin23B	mspo	1.01933	0.771	0.458	9.12831e-82
lin23B	CR45312	1.00098	0.625	0.231	1.58966e-63
lin23B	jeb	0.991023	0.778	0.605	1.56842e-48
lin23B	Lim1	0.986974	0.8	0.33	4.44294e-67
lin23B	jdp	0.93931	0.598	0.355	7.31031e-35
lin23B	eys	0.920542	0.762	0.407	6.64424e-66
lin23B	Fas3	0.918495	0.482	0.165	2.31546e-59
lin23B	nAChRalpha6	0.914966	0.818	0.813	1.62682e-96
lin23B	dpr1	0.898515	0.635	0.456	1.14426e-56
lin23B	CG10089	0.853912	0.381	0.181	4.67039e-134
lin23B	CG31221	0.846903	0.918	0.66	3.17193e-20
lin23B	twz	0.805172	0.164	0.06	4.27202e-39
lin23B	Ddc	0.780405	0.75	0.483	1.0121e-24
lin23B	cpo	0.780334	0.92	0.76	7.04013e-87
lin23B	unc-4	0.767191	0.288	0.04	2.41264e-58
lin23B	CG42750	0.744103	0.8	0.585	3.54431e-56
lin23B	Dscam2	0.711973	0.931	0.725	5.31035e-78
lin23B	CG42541	0.705076	0.705	0.416	2.97432e-21
lin23B	klg	0.689101	0.795	0.69	3.01543e-24
lin23B	ct	0.660035	0.349	0.126	1.86961e-22
lin23B	CG43658	0.653841	0.322	0.159	1.09936e-21
lin23B	roX2	0.606118	0.584	0.474	1.65811e-25
lin23B	tai	0.591507	0.735	0.586	2.16583e-56
lin23B	CG42540	0.590725	0.6	0.432	1.01689e-40
lin23B	CG4341	0.577332	0.374	0.201	8.4204e-26
lin23B	CG8861	0.575399	0.61	0.413	0.000508346
lin23B	Hsromega	0.5691	1	0.99	2.60625e-36
lin23B	ST6Gal	0.548545	0.154	0.065	9.24467e-22
lin23B	CG8248	0.540296	0.378	0.186	9.59761e-32
lin23B	CG14762	0.538982	0.529	0.302	1.64227e-10
lin23B	St3	0.531818	0.635	0.45	1.05252e-19
lin23B	scrt	0.528813	0.919	0.815	1.58172e-24
lin23B	mub	0.522936	0.499	0.355	3.3446e-26
lin23B	Sema2b	0.517433	0.348	0.204	4.79901e-14
lin23B	CG6154	0.512132	0.228	0.147	1.8746e-18
lin23B	CG31475	0.510308	0.32	0.163	2.27692e-12
lin23B	CG32856	0.509004	0.311	0.151	4.08875e-30
lin23B	CG32683	0.508565	0.314	0.173	1.34514e-12
lin23B	pros	0.507561	0.962	0.833	2.6649e-16
lin23B	Pkc53E	0.50737	0.672	0.562	5.91707e-23
lin23B	Lmpt	0.502338	0.252	0.125	3.84031e-07
lin23B	CG31323	0.500739	0.212	0.091	5.06819e-21
