# Supplementary material for: A single-cell transcriptomic atlas of the adult Drosophila ventral nerve cord
Source: eLife. 2020 Apr 21;9:e54074. doi: 10.7554/eLife.54074 (PMC7173974; doi:10.7554/eLife.54074)
Supplement: Figure 5—source data 1. — Cell counts of Acj6-positive and Acj6/GOI co-positive cells in prothoracic hemilineage 23B and mesothoracic hemilineages 8B and 9B. Values are for a single side of a single individual (along with means, standard deviations, and standard errors). [file elife-54074-fig5-data1.xlsx]

## Sheet: Sheet1
knMI15480-TG4.2
	23B (prothoracic)				8B & 9B (mesothoracic)
	Acj6+	kn+ & Acj6+	%		Acj6+	kn+ & Acj6+	%
	43	15	34.8837		29	7	24.1379
	43	15	34.8837		28	7	25
	36	13	36.1111		28	5	17.8571
	42	14	33.3333		27	4	14.8148
	36	13	36.1111		30	4	13.3333
	43	16	37.2093		25	6	24
	36	10	27.7778		26	4	15.3846
mean	39.8571	13.7143	34.33		27.5714	5.28571	19.2183
sd	3.62531	1.97605	3.14042		1.71825	1.38013	5.01778
se	1.37024	0.746876	1.18697		0.649437	0.521641	1.89654
twzMI14153-TG4.2
	23B (prothoracic)				8B & 9B (mesothoracic)
	Acj6+	twz+ & Acj6+	%		Acj6+	twz+ & Acj6+	%
	38	8	21.0526		29	11	37.931
	40	11	27.5		29	9	31.0345
	37	7	18.9189		27	8	29.6296
	44	8	18.1818		25	9	36
	45	9	20		24	9	37.5
	42	10	23.8095		25	7	28
	36	7	19.4444		23	7	30.4348
mean	40.2857	8.57143	21.2725		26	8.57143	32.9328
sd	3.4983	1.51186	3.29948		2.38048	1.39728	4.08935
se	1.32223	0.571429	1.24709		0.899735	0.528121	1.54563
Lim3MI03817-TG4.1
	23B (prothoracic)				8B & 9B (mesothoracic)
	Acj6+	Lim3+ & Acj6+	%		Acj6+	Lim3+ & Acj6+	%
	40	0	0		25	23	92
	35	0	0		27	24	88.8889
	44	0	0		25	23	92
	41	0	0		25	22	88
	44	0	0		28	25	89.2857
	37	0	0		30	27	90
mean	40.1667	0	0		26.6667	24	90.0291
sd	3.65605	0	0		2.06559	1.78885	1.65769
se	1.49257	0	0		0.843274	0.730297	0.676749
