# Supplementary material for: A single-cell transcriptomic atlas of the adult Drosophila ventral nerve cord
Source: eLife. 2020 Apr 21;9:e54074. doi: 10.7554/eLife.54074 (PMC7173974; doi:10.7554/eLife.54074)
Supplement: Figure 7—source data 1. — Table showing the average log-fold change values (>0.5) of monoaminergic cluster-discriminative marker genes, including adjusted p-values (<0.05). pct.1 is the proportion of cells that express the gene in the cluster, pct.2 is the proportion of cells that express the gene in the other clusters. [file elife-54074-fig7-data1.xlsx]

## Sheet: Vmat cluster markers
cluster	gene	avg_logFC	pct.1	pct.2	p_val_adj
Serotonin	SerT	3.21695	1	0.027	2.14e-27
Serotonin	Trh	2.98851	0.986	0.098	2.42e-32
Serotonin	vvl	2.10946	1	0.634	1.01e-102
Serotonin	CG13408	1.42686	0.406	0.036	1.75e-06
Serotonin	Ptp99A	1.35368	1	0.705	1.53e-24
Serotonin	CG17193	1.14564	0.435	0.062	6.47e-05
Serotonin	Ddc	1.12413	0.884	0.554	0.00747467
Serotonin	5-HT1A	1.06561	0.87	0.464	3.72e-08
Serotonin	JhI-21	1.01375	0.855	0.527	3.77e-05
Serotonin	ey	0.887947	0.377	0.027	0.015081
Serotonin	Lim3	0.858332	0.449	0.027	0.00171703
Serotonin	Pu	0.833119	0.681	0.277	0.0348806
Serotonin	kug	0.817308	0.478	0.125	0.00202959
Serotonin	CG32683	0.704672	0.652	0.214	0.0129649
Serotonin	salr	0.701708	0.739	0.232	0.000303444
Serotonin	stan	0.696985	0.391	0.098	0.0247094
Serotonin	Dscam3	0.694831	0.536	0.134	0.000488459
Serotonin	Mkp3	0.686662	0.986	0.759	7.07e-06
Serotonin	CG32204	0.672857	0.42	0.045	0.0367745
Serotonin	CG12994	0.664237	0.507	0.241	0.0489671
Dopmaine	ple	3.01531	0.98	0.031	3.43e-26
Dopmaine	beat-Ic	1.74447	1	0.214	6.94e-17
Dopmaine	mirr	1.72885	0.86	0.092	4.38e-18
Dopmaine	Pvf3	1.69692	0.94	0.344	2.09e-07
Dopmaine	hth	1.43198	0.96	0.603	9.43e-07
Dopmaine	kek1	1.14003	0.92	0.496	2.23e-06
Dopmaine	skl	1.05045	0.5	0.122	0.00326639
Dopmaine	beat-Ib	1.03417	0.74	0.153	1.15e-07
Dopmaine	Toll-6	0.874637	0.76	0.397	0.00183844
Dopmaine	CG15236	0.846081	0.46	0.145	0.00183362
Dopmaine	ed	0.787928	0.5	0.176	0.00586517
Dopmaine	Nlg3	0.718693	0.88	0.618	0.000107293
Octopamine/Tyramine	Tbh	2.85347	0.676	0.028	8.76e-23
Octopamine/Tyramine	CG42394	2.63519	0.676	0.25	6.42e-22
Octopamine/Tyramine	Tdc2	2.45722	0.676	0.028	8.4e-20
Octopamine/Tyramine	twit	2.17942	0.514	0.097	0.000201738
Octopamine/Tyramine	rhea	2.02146	0.703	0.181	8.61e-19
Octopamine/Tyramine	vg	1.83498	0.649	0.021	1.52e-10
Octopamine/Tyramine	lbm	1.57293	0.459	0.021	1.08e-07
Octopamine/Tyramine	CG1572	1.56579	0.432	0.076	0.00405637
Octopamine/Tyramine	CG12594	1.45985	0.676	0.396	2.48e-06
Octopamine/Tyramine	AnxB9	1.32138	0.405	0.062	3.15e-07
Octopamine/Tyramine	CG9896	1.27377	0.351	0.028	6.15e-06
Octopamine/Tyramine	Fas2	1.16489	0.595	0.576	0.000131153
Octopamine/Tyramine	Pde1c	0.937327	0.703	0.347	0.000510226
Octopamine/Tyramine	CG14274	0.929305	0.27	0.049	0.0305698
Octopamine/Tyramine	IA-2	0.90519	1	0.965	4.56e-09
Octopamine/Tyramine	CG1402	0.882325	0.405	0.069	0.000310979
Octopamine/Tyramine	Msp300	0.850675	0.946	0.736	8.83e-06
Octopamine/Tyramine	CG17816	0.8483	0.838	0.451	2.55e-06
Octopamine/Tyramine	CG13743	0.848203	0.622	0.354	0.000179634
Octopamine/Tyramine	CG8066	0.838702	0.405	0.097	0.00497064
Octopamine/Tyramine	ringer	0.821435	0.838	0.743	5.64e-05
Octopamine/Tyramine	GlcAT-P	0.814661	0.811	0.417	0.000877754
Octopamine/Tyramine	SP1173	0.811454	0.297	0.049	0.00608668
Octopamine/Tyramine	Atf3	0.801897	0.784	0.319	2.01e-06
Octopamine/Tyramine	CG1943	0.766793	0.811	0.5	0.00032227
Octopamine/Tyramine	Tsp42Ee	0.76089	0.568	0.368	1.48e-05
Octopamine/Tyramine	stai	0.743243	1	0.993	1.98e-09
Octopamine/Tyramine	uzip	0.731558	0.622	0.319	0.000303384
Octopamine/Tyramine	CG14989	0.72752	0.784	0.681	0.00498193
Octopamine/Tyramine	mbl	0.709215	1	0.972	0.00312861
Octopamine/Tyramine	betaTub56D	0.685806	0.946	0.799	1.23e-05
Octopamine/Tyramine	Dscam4	0.673275	0.541	0.257	0.000654674
Octopamine/Tyramine	pum	0.649092	1	0.993	1.56e-10
Octopamine/Tyramine	Ten-a	0.632977	0.919	0.785	0.0275384
Octopamine/Tyramine	Teh4	0.617267	0.351	0.062	0.0149575
Octopamine/Tyramine	Vmat	0.57753	1	1	0.00226234
Octopamine/Tyramine	CG14207	0.571074	0.703	0.424	0.00855777
Octopamine/Tyramine	JTBR	0.565477	0.486	0.16	0.0373667
Octopamine/Tyramine	CG17691	0.549229	0.405	0.104	0.0268321
Octopamine/Tyramine	shep	0.508699	1	1	0.00383072
Histamine	Lmx1a	1.68509	0.76	0.083	1.16e-12
Histamine	otp	1.50876	0.56	0.026	4.96e-07
Histamine	CG43795	1.36419	0.64	0.077	7.99e-10
Histamine	cv-2	1.16885	0.56	0.064	9.87e-05
Histamine	Frq1	1.13964	0.92	0.545	0.036546
Histamine	CG42594	1.12984	0.68	0.224	3.6e-05
Histamine	rk	0.984432	0.48	0.045	0.000152935
