# Supplementary material for: A single-cell transcriptomic atlas of the adult Drosophila ventral nerve cord
Source: eLife. 2020 Apr 21;9:e54074. doi: 10.7554/eLife.54074 (PMC7173974; doi:10.7554/eLife.54074)
Supplement: Figure 8—source data 1. — Table of neuropeptide expressed genes, their maximum observed log-normalized expression, the rank position of this expression, the percentile of this expression, and their associated receptors. n.d. = no data available regarding associated receptors. [file elife-54074-fig8-data1.xlsx]

## Sheet: NPs
NP Gene	Max Expresison	Rank	Percentile	Receptor
Capa	8.68713	1	100	CapaR
Lk	8.63036	3	99.9802	Lkr
FMRFa	8.53929	4	99.9703	FMRFaR
Nplp1	8.49591	5	99.9605	Gyc76C
Pdf	8.27752	7	99.9407	Pdfr
Orcokinin	8.25089	8	99.9308	n.d
Dh31	8.08894	9	99.9209	DH31-R
Trissin	7.70262	12	99.8912	TrissinR
CCHa1	7.4233	13	99.8814	CCHa1-R
AstC	7.29033	16	99.8517	AstC-R1, AstC-R2
Gpb5	7.14167	17	99.8418	Lgr1
Gpa2	7.13895	18	99.8319	Lgr1
Ms	6.88821	20	99.8121	MsR1, MsR2
Proc	6.84888	21	99.8023	Proc-R
CCHa2	6.77578	23	99.7825	CCHa2-R
Ilp7	6.68032	27	99.7429	Lgr4
Mip	6.56775	29	99.7232	SPR
AstA	6.40097	32	99.6935	AstA-R1, AstA-R2
CCAP	6.35052	35	99.6638	CCAP-R
Crz	6.28698	38	99.6342	CrzR
Tk	6.11215	45	99.565	TkR86C, TkR99D
sNPF	5.95778	53	99.4859	sNPFR
spab	5.79827	54	99.476	n.d
NPF	4.96455	135	98.6751	NPFR
ITP	4.4486	256	97.4787	n.d
Nplp2	4.3561	302	97.0239	n.d
Dh44	3.99305	544	94.6312	DH44R1, DH44R2
Burs	3.85256	693	93.158	rk
