# Supplementary material for: A single-cell transcriptomic atlas of the adult Drosophila ventral nerve cord
Source: eLife. 2020 Apr 21;9:e54074. doi: 10.7554/eLife.54074 (PMC7173974; doi:10.7554/eLife.54074)
Supplement: Figure 9—source data 1. — Table showing the average log-fold change values (>0.5) of glial cluster-discriminative marker genes, including adjusted p-values (<0.05). pct.1 is the proportion of cells that express the gene in the cluster, pct.2 is the proportion of cells that express the gene in the other clusters. [file elife-54074-fig9-data1.xlsx]

## Sheet: Glia cluster markers
cluster	gene	avg_logFC	pct.1	pct.2	p_val_adj
cortex	CG9686	4.24794	0.9	0.189	2.15e-09
cortex	wrapper	3.23435	0.8	0.032	2.02e-13
cortex	CG3270	2.59316	0.7	0.018	9.76e-11
cortex	Obp44a	2.46347	0.8	0.347	2.6e-05
cortex	apolpp	2.44959	0.8	0.185	1.7e-05
cortex	CG40470	2.19229	0.7	0.018	4.3e-06
cortex	CG11407	2.1373	0.8	0.014	3.28e-10
cortex	Slc45-1	2.11177	0.6	0.018	3.13e-06
cortex	CG42235	2.03113	0.8	0.176	2.24e-06
cortex	glob1	1.97371	0.8	0.081	1.36e-08
cortex	mnd	1.96745	0.9	0.419	3.33e-09
cortex	Picot	1.92864	0.8	0.221	0.000268228
cortex	scramb1	1.60725	0.9	0.117	1.01e-10
cortex	Akap200	1.60262	0.5	0.032	4.5e-06
cortex	CDase	1.49975	0.9	0.243	0.0421923
cortex	CG1764	1.49509	0.6	0.045	7.36e-06
cortex	EbpIII	1.3658	0.6	0.131	0.0104072
cortex	CG34355	1.22054	0.4	0.023	0.0360974
cortex	CG1468	1.19936	0.6	0.045	0.00181087
cortex	CG17839	1.15409	0.5	0.027	0.000249896
cortex	CG1607	1.15151	0.5	0.032	0.0170771
cortex	Fatp	1.0619	0.6	0.09	0.00462112
cortex	CG17544	0.993855	0.4	0.036	0.0314758
surface	CG6910	4.17814	0.782	0.017	6.88e-43
surface	CG4797	3.66126	0.764	0.017	2.53e-26
surface	Cys	3.31475	0.855	0.056	1.05e-55
surface	CG18067	3.28595	0.255	0.028	1.01e-07
surface	CG6126	3.06817	0.745	0.011	3.62e-31
surface	Tret1-1	2.80675	0.745	0.017	8.46e-19
surface	ImpL2	2.71156	0.436	0.028	3.72e-13
surface	Fas2	2.64787	0.836	0.13	6.03e-48
surface	Dip-B	2.5014	0.691	0.068	4.04e-33
surface	CG8177	2.25972	0.673	0.034	3.65e-22
surface	Bsg	2.20039	0.982	0.395	1.91e-75
surface	Idgf4	2.11644	0.4	0.045	2.73e-10
surface	CG2082	2.11586	0.636	0.045	7.78e-26
surface	CG34417	2.05844	0.782	0.023	2.29e-19
surface	CG8837	1.98764	0.582	0.023	4.65e-20
surface	sog	1.96292	0.745	0.017	3.28e-13
surface	NaPi-III	1.9465	0.727	0.056	3.33e-29
surface	CG5390	1.88384	0.764	0.028	2.56e-20
surface	nrv3	1.80741	0.945	0.655	3.86e-54
surface	CG10550	1.78005	0.818	0.215	8.11e-34
surface	CG3168	1.74342	0.745	0.164	3.71e-38
surface	SPARC	1.7249	0.727	0.322	6.33e-35
surface	sda	1.6458	0.6	0.028	5.53e-15
surface	gem	1.64224	0.927	0.492	9.67e-42
surface	CG13937	1.6408	0.727	0.119	1.95e-30
surface	CG7220	1.62527	0.673	0.107	7.86e-23
surface	jdp	1.61709	0.727	0.192	2.63e-38
surface	CG9743	1.56732	0.691	0.034	3.04e-19
surface	Sirup	1.55323	0.8	0.446	9.5e-31
surface	CG5973	1.47693	0.618	0.023	2.13e-13
surface	Vha68-2	1.4518	0.745	0.119	1.32e-35
surface	Acon	1.42594	0.8	0.186	1.03e-34
surface	CG3961	1.41957	0.6	0.028	3.02e-15
surface	Ih	1.36426	0.655	0.085	5.44e-14
surface	CG8475	1.35731	0.673	0.079	9.95e-24
surface	Pcyt2	1.34893	0.8	0.339	3.98e-23
surface	scf	1.34848	0.691	0.277	1.71e-27
surface	CG14687	1.33376	0.927	0.712	7.37e-31
surface	CG43658	1.32933	0.745	0.153	1.08e-27
surface	CG9413	1.30429	0.545	0.062	4.05e-21
surface	CG3009	1.25982	0.291	0.051	1.9e-09
surface	ITP	1.25286	0.545	0.028	8.84e-12
surface	Dys	1.23662	0.545	0.017	3e-08
surface	CG2846	1.23642	0.527	0.034	9.2e-12
surface	Prip	1.18734	0.6	0.22	9.79e-19
surface	Tsp42Ed	1.18286	0.218	0.017	0.000408585
surface	CG30285	1.14506	0.891	0.384	2.19e-22
surface	kirre	1.13581	0.491	0.056	5.44e-09
surface	AhcyL1	1.13433	0.582	0.04	2.22e-13
surface	Vmat	1.13204	0.255	0.034	2.43e-05
surface	CG1572	1.11881	0.273	0.028	0.00362592
surface	Pfrx	1.11317	0.509	0.028	1.32e-13
surface	CG13255	1.11052	0.709	0.153	2.17e-17
surface	Hex-A	1.09106	0.927	0.661	7.8e-31
surface	Spn27A	1.07841	0.418	0.034	6.11e-11
surface	Cyp6a17	1.07714	0.855	0.305	4.73e-23
surface	CG13877	1.07547	0.273	0.028	0.000153942
surface	Aldh	1.05626	0.782	0.271	9.94e-19
surface	CG10433	1.05497	0.891	0.718	3.02e-22
surface	Oat	1.05306	0.418	0.028	4.32e-08
surface	CG14989	1.05078	0.673	0.672	0.00841864
surface	Vha16-1	1.0412	0.964	0.537	2.11e-40
surface	Ttd14	1.03378	0.509	0.056	2.69e-10
surface	Timp	1.03289	0.8	0.384	5.31e-15
surface	LpR1	1.02563	0.473	0.04	2.34e-11
surface	CG18622	1.01788	0.618	0.068	2.16e-15
surface	CG7530	1.01081	0.618	0.085	2.38e-15
surface	CG17026	0.994366	0.618	0.107	7.5e-13
surface	CG11665	0.986311	0.655	0.164	9.93e-23
surface	CG11790	0.984888	0.691	0.175	6.37e-15
surface	Snp	0.971186	0.309	0.017	0.000565177
surface	MFS14	0.964782	0.382	0.028	5.88e-07
surface	CG9360	0.961107	0.4	0.051	1.65e-07
surface	CG7231	0.92466	0.418	0.017	5.29e-05
surface	sea	0.91756	0.582	0.158	6.94e-26
surface	RpS15	0.916223	1	0.932	2.18e-54
surface	l(1)G0289	0.915904	0.636	0.136	1.16e-16
surface	CG12811	0.914814	0.527	0.056	4.64e-11
surface	CG30460	0.89983	0.455	0.017	0.000195088
surface	Cam	0.888487	0.927	0.616	8.84e-18
surface	Oda	0.888223	0.982	0.966	1.9e-62
surface	Thor	0.865779	0.345	0.04	1.9e-06
surface	ras	0.864963	0.436	0.04	1.01e-10
surface	Eip93F	0.861747	0.673	0.13	9.37e-14
surface	CG13907	0.854343	0.509	0.028	5.53e-08
surface	Irc	0.844812	0.345	0.028	9.38e-06
surface	Kr-h2	0.836232	0.564	0.136	6.89e-19
surface	VhaM9.7-b	0.821452	0.818	0.452	1.14e-24
surface	alc	0.820312	0.909	0.435	1.81e-26
surface	wal	0.800943	0.818	0.311	1.53e-23
surface	Gp150	0.797453	0.473	0.034	2.83e-07
surface	Vha26	0.796605	0.909	0.475	5.23e-27
surface	kay	0.791244	0.436	0.113	0.000813607
surface	CG5455	0.789688	0.455	0.068	8.84e-10
surface	Vha55	0.788689	0.818	0.379	1.4e-29
surface	cathD	0.788632	0.8	0.514	1.3e-29
surface	FER	0.783672	0.436	0.028	1.99e-07
surface	CG34136	0.780794	0.291	0.073	0.0175193
surface	CG32407	0.777498	0.418	0.119	1.71e-06
surface	CG5793	0.773096	0.8	0.35	7.29e-17
surface	eEF1alpha1	0.76454	0.945	0.842	5.23e-31
surface	CG42542	0.763414	0.618	0.169	7.52e-14
surface	Rab10	0.761393	0.345	0.028	3.68e-07
surface	Rgk1	0.759507	0.364	0.051	0.000575678
surface	Mgstl	0.757845	0.455	0.068	4.09e-14
surface	Reep1	0.754821	0.691	0.181	8.52e-12
surface	CG15098	0.753728	0.927	0.65	7.92e-40
surface	CG13887	0.751457	0.473	0.079	8.53e-07
surface	CG2991	0.748602	0.418	0.051	3.21e-06
surface	ade5	0.74829	0.309	0.017	0.00100258
surface	olf186-F	0.743791	0.473	0.045	4.14e-10
surface	Lmpt	0.743551	0.545	0.198	6.08e-12
surface	CG10479	0.740694	0.255	0.034	0.00734089
surface	mt:ND4	0.736046	0.945	0.718	4.59e-25
surface	Nlp	0.734984	0.709	0.186	1.99e-18
surface	Gprk2	0.734072	0.564	0.13	7.37e-11
surface	awd	0.733573	0.691	0.418	7.82e-30
surface	Vha36-1	0.730881	0.891	0.452	5.36e-28
surface	Tis11	0.730533	0.455	0.051	7.37e-09
surface	Pdcd4	0.729837	0.527	0.09	0.000148914
surface	bun	0.725326	0.673	0.328	1.2e-13
surface	CG16758	0.722551	0.345	0.034	0.00125959
surface	RpS18	0.719206	0.945	0.774	1.66e-28
surface	pdgy	0.698117	0.709	0.407	4.79e-26
surface	SmD3	0.68965	0.418	0.028	2.25e-09
surface	SelR	0.689069	0.473	0.102	1.01e-12
surface	CG1648	0.680583	0.418	0.164	4.27e-08
surface	His2Av	0.677632	0.309	0.04	0.000538353
surface	oys	0.672229	0.473	0.096	3.2e-08
surface	RpS16	0.664572	0.909	0.644	1.65e-23
surface	CG11537	0.663156	0.491	0.062	6.79e-10
surface	yip2	0.66095	0.636	0.186	5.43e-14
surface	pyd3	0.660918	0.364	0.04	1.95e-05
surface	VhaAC39-1	0.659446	0.782	0.322	5.45e-17
surface	alpha-Est9	0.657854	0.473	0.073	1.66e-09
surface	msi	0.654201	0.6	0.203	9.81e-07
surface	CG6028	0.652697	0.527	0.113	2.23e-08
surface	betaggt-II	0.645025	0.564	0.181	7.78e-15
surface	AdSS	0.63697	0.6	0.175	1.5e-16
surface	CG4302	0.633318	0.691	0.22	1.05e-07
surface	Non2	0.631862	0.4	0.107	8.96e-05
surface	RpS9	0.624415	0.927	0.712	1.79e-27
surface	VhaAC45	0.620981	0.6	0.243	3.97e-18
surface	Ssadh	0.620873	0.8	0.723	4.44e-27
surface	CG32647	0.619204	0.345	0.023	8.37e-06
surface	pdm3	0.617762	0.436	0.119	9.74e-11
surface	CG11576	0.608987	0.345	0.023	0.000845271
surface	by	0.603446	0.345	0.079	0.00125435
surface	CG31689	0.600333	0.273	0.023	8.39e-05
surface	CG16947	0.587212	0.364	0.045	0.000253288
surface	CG17292	0.585022	0.345	0.034	0.00123281
surface	Rgl	0.578989	0.418	0.062	1.67e-07
surface	Dg	0.570936	0.291	0.017	0.0123424
surface	Pax	0.567376	0.364	0.045	1.11e-05
surface	uex	0.566719	0.491	0.164	0.00460735
surface	His4r	0.558352	1	0.955	8.34e-42
surface	RpL27A	0.556146	1	0.977	6.47e-42
surface	scu	0.554105	0.455	0.096	1.46e-09
surface	RpL31	0.549858	1	0.808	2.57e-29
surface	VhaPPA1-1	0.548512	0.6	0.232	1.12e-17
surface	RhoL	0.546679	0.273	0.017	0.0215976
surface	NK7.1	0.543335	0.418	0.079	0.000496013
surface	CG17272	0.54301	0.345	0.051	0.00201614
surface	CG33129	0.542708	0.545	0.13	1.63e-06
surface	RpS20	0.542055	1	0.932	2.77e-33
surface	ena	0.538974	0.309	0.028	0.000107001
surface	Thiolase	0.537598	0.4	0.147	8e-09
surface	Gabat	0.537073	0.945	0.904	2.85e-18
surface	Msp300	0.535906	0.782	0.418	4.05e-09
surface	CG11899	0.535829	0.418	0.085	1.13e-08
surface	mt:srRNA	0.535775	0.291	0.051	0.0135926
surface	Vha44	0.531978	0.655	0.232	4.36e-10
surface	mino	0.530273	0.345	0.017	0.000299069
surface	Nph	0.528307	0.4	0.102	0.00219393
surface	Snap29	0.526793	0.4	0.085	2.24e-06
surface	CG33995	0.525871	0.836	0.384	7.38e-12
surface	FK506-bp2	0.524717	0.691	0.288	7.31e-17
surface	Usp7	0.523977	0.436	0.164	0.0410579
surface	RpS4	0.515042	0.945	0.831	6.38e-24
surface	Vha13	0.513749	0.873	0.689	7.1e-28
surface	CG17646	0.51315	0.236	0.017	0.00778836
surface	CG42240	0.512269	0.491	0.158	9.03e-08
surface	CG42496	0.508161	0.255	0.017	0.0340671
surface	CG4538	0.508118	0.273	0.028	0.0316598
surface	mts	0.507952	0.855	0.497	1.13e-21
surface	CG13252	0.50753	0.291	0.051	0.0362219
surface	CG7272	0.506429	0.582	0.209	3.54e-05
surface	Mlc-c	0.502197	0.473	0.096	7.7e-09
surface	RpL26	0.501965	0.927	0.819	1.41e-31
surface	CG1943	0.501256	0.364	0.056	2.39e-05
ensheathing	CG16743	3.04271	0.976	0.167	7.81e-69
ensheathing	CG9657	2.66803	0.963	0.133	2.97e-60
ensheathing	Ugt35b	2.43193	0.988	0.3	5.27e-49
ensheathing	List	2.27392	0.793	0.067	1.93e-24
ensheathing	CG10513	2.24808	0.793	0.107	3.96e-24
ensheathing	CG31248	2.20052	0.939	0.193	3.76e-41
ensheathing	CG42613	1.979	0.939	0.167	6.65e-27
ensheathing	Inx3	1.91564	0.756	0.12	1e-23
ensheathing	CG9377	1.89897	0.476	0.1	0.000419685
ensheathing	CG10514	1.84443	0.61	0.053	4.76e-15
ensheathing	wdp	1.83106	0.585	0.027	3.19e-09
ensheathing	CG31663	1.81146	0.732	0.093	3.44e-19
ensheathing	CG7084	1.76467	0.61	0.047	1.57e-11
ensheathing	CG6040	1.75227	0.573	0.053	5.66e-13
ensheathing	CG30197	1.74044	0.939	0.4	0.000279635
ensheathing	Eaat2	1.71913	0.634	0.053	1.8e-12
ensheathing	CG9436	1.66862	0.512	0.047	2.36e-10
ensheathing	euc	1.64054	0.793	0.18	4.35e-06
ensheathing	CG11889	1.61545	0.488	0.027	1.54e-07
ensheathing	CG9507	1.61042	0.659	0.093	2.25e-16
ensheathing	Npc2a	1.5854	0.89	0.267	1.58e-18
ensheathing	hoe1	1.5521	0.756	0.213	8.98e-22
ensheathing	Tsf1	1.54238	0.866	0.36	2.57e-08
ensheathing	CG12177	1.53288	0.756	0.22	1.68e-22
ensheathing	zyd	1.49437	0.805	0.113	2.51e-14
ensheathing	CR43259	1.49405	0.646	0.08	1.52e-12
ensheathing	DNaseII	1.46928	0.683	0.08	6.83e-13
ensheathing	CG1213	1.4446	0.512	0.06	1.96e-10
ensheathing	CG31869	1.42292	0.415	0.033	5.09e-07
ensheathing	axo	1.41736	0.512	0.06	2.07e-09
ensheathing	mgl	1.41027	0.732	0.22	9.79e-07
ensheathing	CR44107	1.40088	0.488	0.067	1.25e-09
ensheathing	wtrw	1.38918	0.61	0.06	2.84e-08
ensheathing	ssp7	1.38333	0.402	0.06	3.07e-06
ensheathing	CG5895	1.35235	0.927	0.287	1.03e-15
ensheathing	Orct	1.29243	0.573	0.2	0.00994712
ensheathing	dally	1.27669	0.976	0.74	2.09e-33
ensheathing	Dbi	1.27307	0.659	0.173	1.61e-07
ensheathing	Oatp58Dc	1.26104	0.5	0.067	7.39e-08
ensheathing	CG31344	1.252	0.598	0.167	4.35e-13
ensheathing	ClC-a	1.24328	0.366	0.04	4.21e-05
ensheathing	nrv2	1.223	1	0.713	5.52e-26
ensheathing	Cyp1	1.21157	1	0.82	3.05e-11
ensheathing	CG10178	1.19426	0.39	0.027	5.06e-05
ensheathing	Past1	1.19251	0.561	0.207	4.69e-08
ensheathing	Ten-a	1.15815	0.732	0.153	7.08e-06
ensheathing	CG5254	1.13783	0.512	0.093	3.82e-06
ensheathing	CDase	1.10566	0.61	0.087	3.49e-05
ensheathing	vvl	1.10427	0.512	0.12	0.00905474
ensheathing	Mal-A5	1.09708	0.512	0.093	1.01e-05
ensheathing	Sod3	1.07068	0.963	0.627	4.95e-17
ensheathing	CG9471	1.06386	0.683	0.34	1.44e-11
ensheathing	Ssk	1.06231	0.476	0.12	0.000204883
ensheathing	CG5835	1.0523	0.305	0.02	0.00632323
ensheathing	CG11892	1.02682	0.317	0.04	0.00198748
ensheathing	Idgf3	1.02549	0.878	0.4	1.88e-07
ensheathing	Proc-R	1.02543	0.354	0.067	0.00532549
ensheathing	SLC22A	1.02394	0.293	0.047	0.00152049
ensheathing	CG10960	0.994891	0.561	0.153	1.82e-07
ensheathing	bnb	0.992815	0.61	0.113	0.0143121
ensheathing	GlcAT-P	0.989364	0.72	0.307	2.87e-10
ensheathing	CG8369	0.980414	0.976	0.567	0.000158718
ensheathing	Hydr1	0.980381	0.463	0.12	1.03e-05
ensheathing	Adh	0.952919	0.988	0.94	5.68e-08
ensheathing	Irk2	0.938175	0.854	0.44	1.16e-13
ensheathing	cdi	0.938011	0.561	0.247	0.00425015
ensheathing	CG6723	0.923064	0.744	0.353	1.48e-10
ensheathing	CG3940	0.89883	0.988	0.533	1.37e-07
ensheathing	CG14945	0.874003	0.622	0.187	2.01e-05
ensheathing	CG2680	0.862481	0.354	0.067	0.00101822
ensheathing	CG31676	0.862231	0.878	0.567	2.63e-05
ensheathing	Jheh1	0.849754	0.378	0.093	0.0179986
ensheathing	Alp4	0.789763	0.317	0.053	0.0365344
ensheathing	Csas	0.762816	0.744	0.367	1.37e-06
ensheathing	CR45161	0.749864	0.646	0.347	1.95e-05
ensheathing	rho	0.729441	0.524	0.187	0.0243257
ensheathing	CG5758	0.724631	0.939	0.76	4.7e-05
ensheathing	CG12730	0.694039	0.646	0.433	0.000688514
ensheathing	RpL41	0.668481	1	0.987	0.0120883
ensheathing	MESK2	0.633002	0.72	0.44	0.010074
ensheathing	CG4829	0.539064	0.72	0.38	0.00424982
astocyte-like	alrm	3.81784	1	0.231	1.07e-160
astocyte-like	Gat	3.29479	1	0.578	7.22e-170
astocyte-like	CG9394	2.84019	0.976	0.483	2.67e-142
astocyte-like	CG1537	2.81972	0.953	0.075	1.55e-33
astocyte-like	Eaat1	2.70803	1	0.252	4.75e-81
astocyte-like	CG42342	2.70562	0.976	0.218	1.66e-54
astocyte-like	wun2	2.37155	0.824	0.034	1.89e-14
astocyte-like	Tet	2.36257	0.918	0.122	1.2e-32
astocyte-like	Dat	2.23421	0.753	0.095	4.06e-18
astocyte-like	Adgf-D	2.22365	0.906	0.129	1.17e-28
astocyte-like	e	2.11503	0.659	0.041	6.85e-11
astocyte-like	CG13631	2.09269	0.859	0.517	1.98e-36
astocyte-like	flw	2.08691	0.953	0.415	1.58e-45
astocyte-like	Tsp5D	1.96571	0.894	0.456	5.02e-50
astocyte-like	CG43693	1.94985	0.918	0.429	6.55e-33
astocyte-like	Chd64	1.86372	0.906	0.497	7.15e-33
astocyte-like	CG6465	1.75851	0.659	0.109	8.65e-14
astocyte-like	CG34367	1.74516	0.553	0.034	1.94e-07
astocyte-like	CG12991	1.71582	0.682	0.109	1.96e-13
astocyte-like	CG42741	1.69569	0.471	0.014	0.000951332
astocyte-like	CG32982	1.68536	0.965	0.408	3.64e-23
astocyte-like	GstD3	1.57192	0.8	0.354	6.37e-10
astocyte-like	CG15209	1.50238	0.894	0.592	0.0266605
astocyte-like	CR45018	1.47695	0.529	0.259	1.85e-05
astocyte-like	Prosap	1.46699	0.929	0.381	1.2e-22
astocyte-like	ogre	1.4557	0.976	0.673	1.26e-24
astocyte-like	CG31235	1.45373	0.541	0.061	1.04e-06
astocyte-like	Amph	1.43602	0.953	0.401	1.55e-19
astocyte-like	wun	1.43201	0.553	0.163	1.03e-07
astocyte-like	RapGAP1	1.42883	0.835	0.347	4.79e-16
astocyte-like	Pde6	1.40159	0.435	0.068	5.35e-05
astocyte-like	sty	1.40006	0.612	0.15	1.69e-09
astocyte-like	CG1358	1.39616	0.718	0.218	2.4e-10
astocyte-like	Gs2	1.38365	1	0.741	4.53e-19
astocyte-like	pum	1.36477	0.988	0.789	7.59e-23
astocyte-like	CR43459	1.31637	0.541	0.218	0.000328107
astocyte-like	CAH1	1.30733	0.918	0.558	5.14e-08
astocyte-like	CG9328	1.28368	0.682	0.245	2.21e-07
astocyte-like	CG1552	1.26103	0.976	0.667	1.92e-06
astocyte-like	fok	1.25925	0.882	0.361	9.94e-13
astocyte-like	htl	1.2507	0.506	0.15	3.15e-05
astocyte-like	Galphai	1.23948	0.576	0.224	0.000116164
astocyte-like	tal-AA	1.23841	0.929	0.449	4.23e-09
astocyte-like	CG31705	1.19936	0.941	0.694	3.47e-05
astocyte-like	CG30015	1.19461	0.4	0.088	0.000523367
astocyte-like	Ace	1.18255	0.765	0.32	3.43e-08
astocyte-like	CG42265	1.15694	0.447	0.082	7.35e-05
astocyte-like	Hexo2	1.14529	0.447	0.129	0.0141272
astocyte-like	Cyp4g15	1.14401	0.671	0.238	0.000978169
astocyte-like	CG43739	1.12145	0.529	0.163	0.00010773
astocyte-like	Rbfox1	1.11757	0.929	0.687	2.01e-10
astocyte-like	GILT3	1.11615	0.482	0.122	0.000286991
astocyte-like	corn	1.08385	0.4	0.075	0.000250315
astocyte-like	Spn31A	1.08047	0.271	0.02	0.0260587
astocyte-like	ringer	1.06971	0.447	0.122	5.12e-05
astocyte-like	bbc	1.04322	1	0.673	5.39e-06
astocyte-like	Treh	1.018	0.929	0.558	5.77e-05
astocyte-like	Eip63E	1.01138	0.671	0.34	0.0100883
astocyte-like	CG7607	0.998737	1	0.497	7.57e-10
astocyte-like	ninaB	0.991029	0.518	0.218	0.0150814
astocyte-like	Mkp3	0.947483	0.741	0.395	3.38e-06
astocyte-like	CG14688	0.931966	0.8	0.483	2.42e-05
astocyte-like	CG14141	0.906811	0.976	0.626	3.11e-06
astocyte-like	tna	0.894571	0.765	0.429	0.00313223
astocyte-like	CG8861	0.874402	0.353	0.102	0.0270231
astocyte-like	mei-P26	0.82164	0.812	0.449	0.00106492
